# Supplementary material for: Photoinduced, copper-catalyzed three components cyanofluoroalkylation of alkenes with fluoroalkyl iodides as fluoroalkylation reagents
Source: Royal Society of Chemistry journal article supplement (doi:10.1039/c7cc07128k), 2017-01-01

# **Photoinduced, Copper-Catalyzed Three Components Cyanofluoroalkylation of Alkenes with Fluoroalkyl Iodides as Fluoroalkylation Reagents**

Quanping Guo, Mengran Wang, Yanfang Wang, Zhaoqing Xu\*,  
and Rui Wang\*

*Key Laboratory of Preclinical Study for New Drugs of Gansu Province, The Institute  
of Pharmacology, School of Basic Medical Science, Lanzhou University, 199 West  
Donggang Road, Lanzhou 730000, China.*

E-mail: zqxu@lzu.edu.cn, wangrui@lzu.edu.cn

## **Supporting Information**

### **Table of Content:**

|                                                                      |            |
|----------------------------------------------------------------------|------------|
| <b>1. General information</b>                                        | <b>S2</b>  |
| <b>2. General procedure for the synthesis of alkenes</b>             | <b>S2</b>  |
| <b>3. General procedure for the cyanofluoroalkylation of alkenes</b> | <b>S4</b>  |
| <b>4. Synthetic applications</b>                                     | <b>S8</b>  |
| <b>5. The mechanistic study</b>                                      | <b>S8</b>  |
| <b>6. References</b>                                                 | <b>S13</b> |
| <b>7. Characterization of products</b>                               | <b>S14</b> |
| <b>8. X-ray structure of 6e</b>                                      | <b>S26</b> |
| <b>9. NMR spectra of new compounds</b>                               | <b>S27</b> |

## 1. General information

Unless stated otherwise, all reactions were carried out under an argon atmosphere. All solvents were purified and dried according to standard methods prior to use.  $^1\text{H}$  NMR,  $^{13}\text{C}$  NMR,  $^{19}\text{F}$  NMR, and  $^{31}\text{P}$  NMR spectra were recorded on a Varian instrument (300 MHz, 75 MHz, 282 MHz, and 121 MHz) spectrometer in  $\text{CDCl}_3$  using tetramethylsilane (TMS) as internal standard unless otherwise noted. Data for  $^1\text{H}$  NMR are recorded as follows: chemical shift ( $\delta$ , ppm), multiplicity (s = singlet, d = doublet, t = triplet, m = multiplet, br = broad, q = quartet or unresolved, coupling constant(s) in Hz, integration). Data for  $^{13}\text{C}$  NMR,  $^{19}\text{F}$  NMR and  $^{31}\text{P}$  NMR are reported in terms of chemical shift ( $\delta$ , ppm). High resolution mass spectra (HRMS) were obtained by the ESI or EI ionization sources.

**Materials:**  $\text{Cu}(\text{OAc})_2$  was prepared from  $\text{Cu}(\text{OAc})_2 \cdot \text{H}_2\text{O}$  by refluxing in acetic anhydride and washed with dry  $\text{Et}_2\text{O}$ . All other reagents were commercially available and used as received.

## 2. General procedure for the synthesis of alkenes

### 2.1 General procedure for the synthesis of alkenes **2a—2p**.<sup>1</sup>

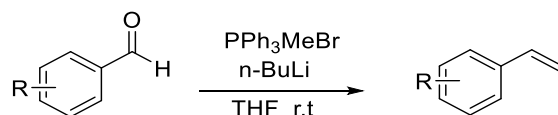

In a 100 mL round bottomed flask equipped with a stir bar, methyltriphenylphosphonium bromide (12 mmol, 1.2 equiv) were dissolved with 50 mL THF under Ar atmosphere, *n*-BuLi (2.5 mol/L, 12mmol, 1.2 equiv) were added dropwise under 0 °C, the mixture was stirred for 15 minutes. Aldehyde (10.0 mmol) was dissolved with THF, which was added into reaction, and the mixture continues to stir for 1 h under 0 °C. After the reaction mixture was stirred at room temperature for another 9 h, the mixture was quenched with water and extracted with diethyl ether. The combine organic layer was washed with  $\text{H}_2\text{O}$  and brine, and dried over by  $\text{Na}_2\text{SO}_4$ . The solvent was removed under reduced pressure, and the residue was chromatographed (*n*-hexane) by silica gel column to give alkenes **2a-2p**.

## 2.2 General procedure for the synthesis of alkene **2g**.<sup>2</sup>

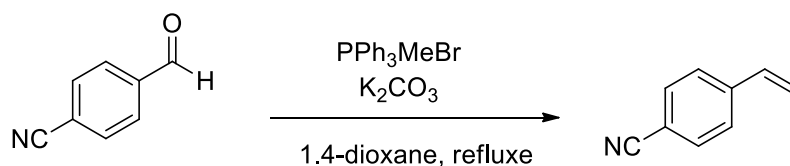

In a 100 mL round bottomed flask equipped with a stir bar, methyltriphenylphosphonium bromide (12 mmol, 1.2 equiv) and  $\text{K}_2\text{CO}_3$  (20 mmol, 2 equiv) were dissolved with 20 mL 1,4-dioxane, aldehyde (10 mmol) was dissolved with 1,4-dioxane, which was added into the reaction mixture. After the reaction mixture was heated to reflux (110 °C) overnight, the mixture was cooled to room temperature, quenched with water, and extracted with diethyl ether. The combine organic layer was washed with  $\text{H}_2\text{O}$  and brine, and dried over  $\text{Na}_2\text{SO}_4$ . The solvent was removed under reduced pressure, and the residue was chromatographed (*n*-hexane) by silica gel column to give alkene **2g**.

## 2.3 General procedure for the synthesis of alkene **5e**.<sup>3</sup>

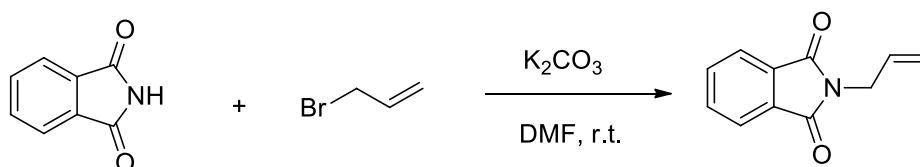

In a 50 ml round bottomed flask equipped with a stir bar, isoindoline-1,3-dione (5 mmol) and  $\text{K}_2\text{CO}_3$  (6.5 mmol, 1.3 equiv) was dissolved with 15 mL DMF. Allyl bromide (6.5 mmol, 1.3 equiv) was added dropwise into the mixture. After the reaction was completed by TLC monitoring, and the reaction mixture was quenched with water and extracted with DCM, washed with brine, and dried over  $\text{Na}_2\text{SO}_4$ , the solvent was removed under reduced pressure, and the residue was chromatographed by silica gel column to give **5e**.

## 2.4 General procedure for the synthesis of **5j**.<sup>4</sup>

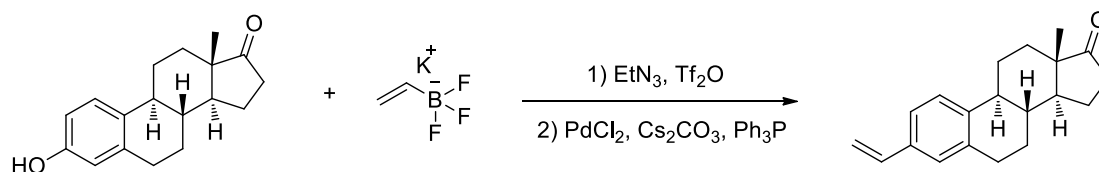

1) A mixture of estrone (5 mmol) dissolved in 30 mL DCM was added  $\text{Et}_3\text{N}$  (10 mmol, 2 equiv). Trifluoromethanesulfonic anhydride (5.5 mmol, 1.1 equiv) was added dropwise no less than 9 minutes into the mixture under 0 °C. The reaction mixture was stirred at room temperature for 3 h. The resulting mixture was extracted with DCM, washed with sat.  $\text{NH}_4\text{Cl}$ . The organic layer was dried over  $\text{Na}_2\text{SO}_4$ , and the solvent was removed under reduced pressure. The crude product was directly used in the next step without further purification.

2) The previous crude product, potassium vinyltrifluoroborate (5 mmol), PdCl<sub>2</sub> (0.1 mmol, 0.02 equiv), Ph<sub>3</sub>P (0.3 mmol, 0.06 equiv), H<sub>2</sub>O (0.6 ml), and CsCO<sub>3</sub> (15 mmol, 3 equiv) were combined in an oven-dried sealing tube. The vessel was evacuated and backfilled with N<sub>2</sub> (repeated for 3 times), THF (20 mL) were added *via* syringe. The tube was sealed with a Teflon lined cap and the reaction mixture was placed into a preheated oil bath at 85 °C for 19 h. The mixture was then cooled to room temperature, filtered through a plug of silica and washed with EtOAc. The filtrate was concentrated under vacuum and purified by flash column chromatography on silica gel (PE: EA = 5:1) to give the product **5j**.

### 3. General procedures for the cyanofluoroalkylation of alkenes.

#### 3.1 Optimization of reaction conditions

**Table S1. Catalysts screening<sup>a</sup>**

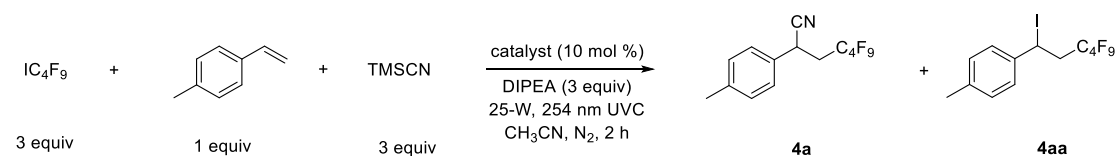

| Entry          | Catalyst                              | Yield ( <b>4a/4aa</b> ) (%) <sup>b</sup> | Entry | Catalyst                                                          | Yield ( <b>4a/4aa</b> ) (%) <sup>b</sup> |
|----------------|---------------------------------------|------------------------------------------|-------|-------------------------------------------------------------------|------------------------------------------|
| 1              | CuI                                   | 31/0                                     | 10    | CuF <sub>2</sub>                                                  | 65/0                                     |
| 2 <sup>c</sup> | CuI                                   | 61/0                                     | 11    | CuF <sub>2</sub> .H <sub>2</sub> O                                | 67/0                                     |
| 3              | CuCl                                  | 61/0                                     | 12    | CuCl <sub>2</sub> .H <sub>2</sub> O                               | 63/0                                     |
| 4              | CuBr                                  | 64/0                                     | 13    | Cu(OH) <sub>2</sub>                                               | 68/0                                     |
| 5              | Cu(MeCN) <sub>4</sub> PF <sub>6</sub> | 57/0                                     | 14    | CuSO <sub>4</sub>                                                 | 67/0                                     |
| 6              | Cu <sub>2</sub> O                     | 65/0                                     | 15    | Fe(OTf) <sub>3</sub>                                              | 0                                        |
| 7              | Cu(OTf) <sub>2</sub>                  | 59/0                                     | 16    | Fe(acac) <sub>3</sub>                                             | 0                                        |
| 8              | <b>Cu(OAc)<sub>2</sub></b>            | <b>87/0</b>                              | 17    | Ni(OTf) <sub>2</sub>                                              | 0                                        |
| 9              | Cu(acac) <sub>2</sub>                 | 61/0                                     | 18    | Ni(NO <sub>3</sub> ) <sub>2</sub> (H <sub>2</sub> O) <sub>6</sub> | 11/5                                     |

<sup>a</sup>Unless otherwise noted, the reactions were carried out by using **2a** (0.1 mmol), **1a** (3.0 equiv), **3** (3 equiv), amine (3 equiv), solvent (1.0 mL), catalyst (10 mol %), under N<sub>2</sub>, and stirred at rt for 2 h under UV light irradiation (25-W UVC (254 nm) compact fluorescent light bulb). <sup>b</sup>Based on <sup>1</sup>H NMR analysis using anisole as an internal standard. <sup>c</sup>2 equiv of H<sub>2</sub>O was added here and after.

**Table S2. Amines screening<sup>a</sup>**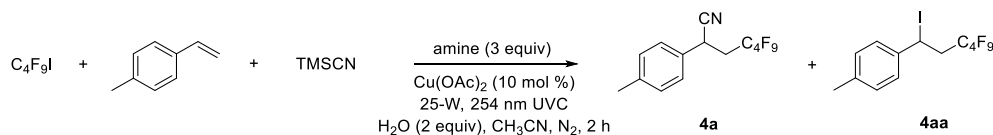

| Entry | Amine              | Yield (4a/4aa) (%) <sup>b</sup> | Entry | Amine       | Yield (4a/4aa) (%) <sup>b</sup> |
|-------|--------------------|---------------------------------|-------|-------------|---------------------------------|
| 1     | Et <sub>3</sub> N  | 61/0                            | 5     | TMEDA       | 30/0                            |
| 2     | DBU                | 38/0                            | 6     | phenylamine | 4/30                            |
| 3     | pyridine           | 9/22                            | 7     | DMAP        | 40/0                            |
| 4     | Et <sub>2</sub> NH | 66/0                            | 8     | DABCO       | 64/0                            |

<sup>a</sup>0.1 mmol scale. <sup>b</sup>Based on <sup>1</sup>H NMR analysis using anisole as an internal standard.

**Table S3. Solvents screening<sup>a</sup>**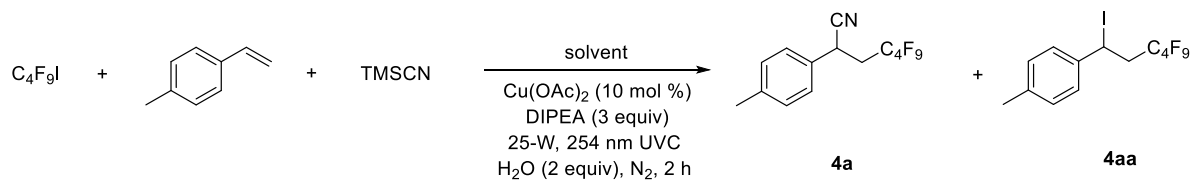

| Entry | Solvent          | Yield (4a/4aa) (%) <sup>b</sup> | Entry | Solvent     | Yield (4a/5) (%) <sup>b</sup> |
|-------|------------------|---------------------------------|-------|-------------|-------------------------------|
| 1     | DMF              | 28/0                            | 5     | acetone     | 21/2                          |
| 2     | THF              | 3/0                             | 6     | DCM         | 28/0                          |
| 3     | DMSO             | 55/0                            | 7     | 1,4-dioxane | 25/3                          |
| 4     | H <sub>2</sub> O | 3/0                             | 8     | toluene     | 5/5                           |

<sup>a</sup>0.1 mmol scale. <sup>b</sup>Based on <sup>1</sup>H NMR analysis using anisole as an internal standard.

**Table S4. Control experiments:**

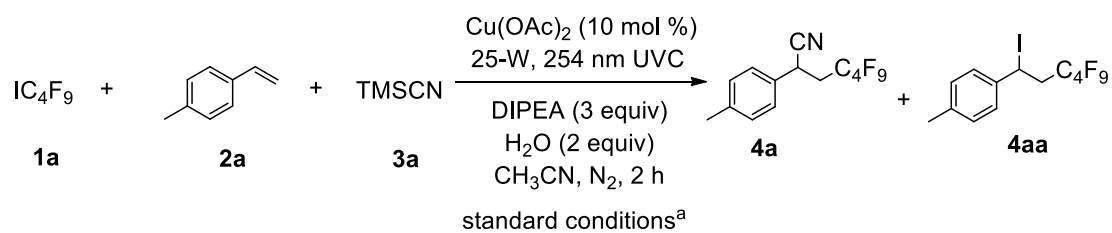

| entry                 | change from the "standard conditions" | yield ( <b>4a/4aa</b> ) (%) <sup>b</sup> |
|-----------------------|---------------------------------------|------------------------------------------|
| 1                     | no change                             | 87/0                                     |
| 2                     | no hv, 80 °C, 12 h                    | 0                                        |
| 3                     | no hv, rt, 24 h                       | 0                                        |
| 4                     | no DIPEA                              | 0/12                                     |
| 5                     | no Cu(OAc) <sub>2</sub>               | 0                                        |
| 6                     | <b>1a</b> (1.0 equiv)                 | 29/0                                     |
| 7                     | <b>1a</b> (2.0 equiv)                 | 48/0                                     |
| 8                     | <b>3a</b> (1.0 equiv)                 | 24/0                                     |
| 9                     | <b>3a</b> (2.0 equiv)                 | 45/0                                     |
| 10                    | DIPEA (1.0 equiv)                     | 15/0                                     |
| 11                    | DIPEA (2.0 equiv)                     | 40/0                                     |
| <b>12<sup>c</sup></b> | <b>DIPEA (4.0 equiv)</b>              | <b>92(91)/0</b>                          |
| 13                    | 5 mol % of Cu(OAc) <sub>2</sub>       | 65/0                                     |
| 14                    | 365 nm UVC instead of 254 nm UVC      | 19/0                                     |

<sup>a</sup>Standard conditions were carried out by using **2a** (0.1 mmol), **1a** (3.0 equiv), Cu(OAc)<sub>2</sub> (10 mol %), DIPEA (3.0 equiv), H<sub>2</sub>O (2 equiv), CH<sub>3</sub>CN (1ml), under Ar, and stirred at rt for 2 h under UV light irradiation. <sup>b</sup>Based on <sup>1</sup>H NMR analysis using anisole as an internal standard. <sup>c</sup>Isolated yields in para.

### 3.2 General procedures of the cyanofluoroalkylation of alkenes

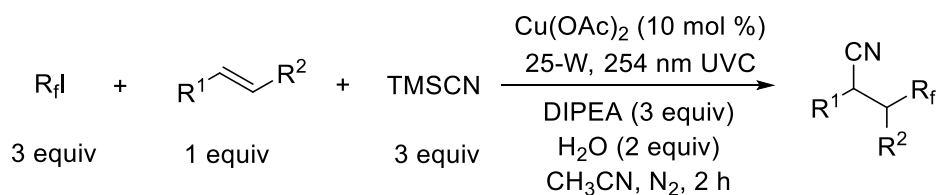

To an oven-dried 10 mL quartz test tube with a magnetic stirring bar was added Cu(OAc)<sub>2</sub> (0.04 mmol, 10 mol %). Then, air was withdrawn and backfilled with Ar (three times). Perfluoroalkyl iodide (R<sub>f</sub>I, 1.2 mmol, 3 equiv), alkene (0.4 mmol) and trimethylsilyl cyanide (TMSCN, 1.2 mmol, 3 equiv), 4 mL of CH<sub>3</sub>CN, ethyldiisopropylamine (DIPEA, 1.6 mmol, 4 equiv), H<sub>2</sub>O (0.8 mmol, 2 equiv) were added in turn by syringe. Thereafter, the test tube was transferred to a UV photoreactor (25W, see Scheme S1 for details), where it was irradiated at 254 nm for 2 h. Two hours later, the reaction was quenched with water (2 mL), extracted with DCM, dried over anhydrous sodium sulfate, concentrated in *vacuo* and purified by column chromatography (*n*-hexane/dichloromethane 20:1-5:1) to afford the product.

For CF<sub>3</sub>I, an oven-dried 10 mL quartz test tube with a magnetic stirring bar was added Cu(OAc)<sub>2</sub> (0.04 mmol, 10 mol %), air was withdrawn and backfilled with Ar (three times). The mixture was cooled to -78°C, trifluoromethyl iodide (1.2 mmol, 3 equiv) was condensed and added to the above mixture via a Dewar type condenser fitted with an 18-gauge needle. Then, alkene (0.4 mmol) and trimethylsilyl cyanide (TMSCN, 1.2 mmol, 3 equiv), 4 mL of CH<sub>3</sub>CN, ethyldiisopropylamine (DIPEA, 1.6 mmol, 4 equiv), H<sub>2</sub>O (0.8 mmol, 2 equiv) were added in turn by syringe. Thereafter, the test tube was transferred to a UV photoreactor (25W, see Scheme S1 for details), where it was irradiated at 254 nm for 2 h. Two hours later, the reaction was quenched with water (2 mL), extracted with DCM, dried over anhydrous sodium sulfate, concentrated in *vacuo* and purified by column chromatography (*n*-hexane/dichloromethane 20:1-5:1) to afford the product.

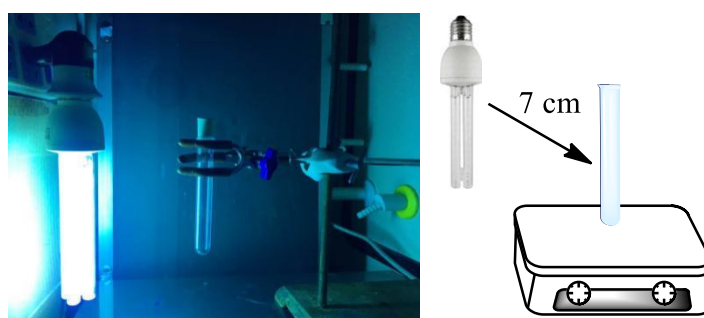

**Scheme S1. Placement of CFL around quartz test tube.**

Instructions on placement of CFL: One 25-W UVC compact fluorescent light bulb was placed next to the quartz test tube and the distance was about 7 cm. A cardboard box lined with tin foil was placed over the lamps and stir plate. In one side of the cardboard box, part of the side was cut out, and a high-speed fan was setup for dissipating heat.

## 4. Synthetic applications.<sup>5</sup>

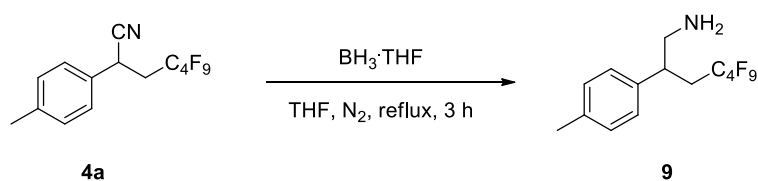

$\text{BH}_3 \cdot \text{THF}$  (1.8 mmol) was added to a solution of **4a** (0.6 mmol) in dry THF (2 mL) at room temperature under an atmosphere of  $\text{N}_2$ , and then refluxed for 3 h. The reaction was quenched by the dropwise addition of 6M aqueous HCl (1 mL). After refluxing for a further 2 h, the solution was made basic with 6M aqueous NaOH, then extracted three times with DCM. The combined extracts were dried over  $\text{Na}_2\text{SO}_4$ , and the solvent was removed in *vacuo*. The residue was purified by flash column chromatography to afford the derivative product **9**.

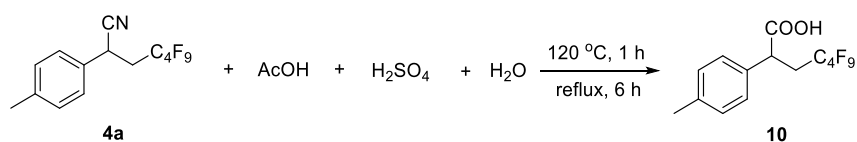

A 10 mL round bottom flask equipped with a stir bar was added **4a**, AcOH (1 mL),  $\text{H}_2\text{O}$  (1 mL),  $\text{H}_2\text{SO}_4$  (1 mL), and heated to  $120^\circ\text{C}$  for 1 h. Then, refluxed for 6 h. The resulting mixture was cooled to room temperature; sodium hydroxide was used to adjust pH to 14. The suspension was diluted with  $\text{H}_2\text{O}$  until all the solids dissolved. The solution was washed with EtOAc (2×20 ml). The hydrochloric acid was added dropwise until pH = 1. The resulting mixture was extracted with EtOAc (3×20 ml), washed with brine, dried over  $\text{Na}_2\text{SO}_4$ , filtered, and concentrated in *vacuo*. The crude material was purified by flash chromatography on silica gel to afford derivative product **10**.

## 5. The mechanistic study

### 5.1 Radical inhibition experiments

In order to gain some information on the reaction mechanism, radical inhibition experiments were examined. When radical scavenger TEMPO (2,2,6,6-tetromethyl-1-piperidinyloxy, 4.0 equiv) was added under the standard conditions, the reaction was completely suppressed (eq 1). No **4a** was detected and TEMPO- $\text{C}_4\text{F}_9$  product **11** was isolated by column chromatography gave 45% yield. Addition of butylated hydroxytoluene (BHT) led to a dramatic decrease of the yield (eq 2). These results indicated that a radical pathway could be involved. Which suggested that a radical pathway was involved in the current reaction.



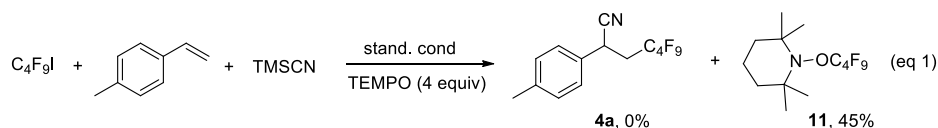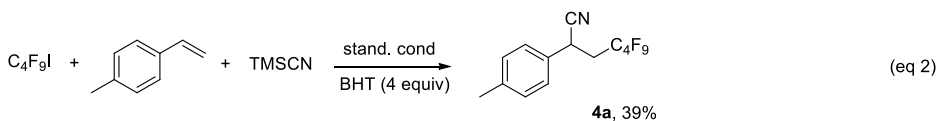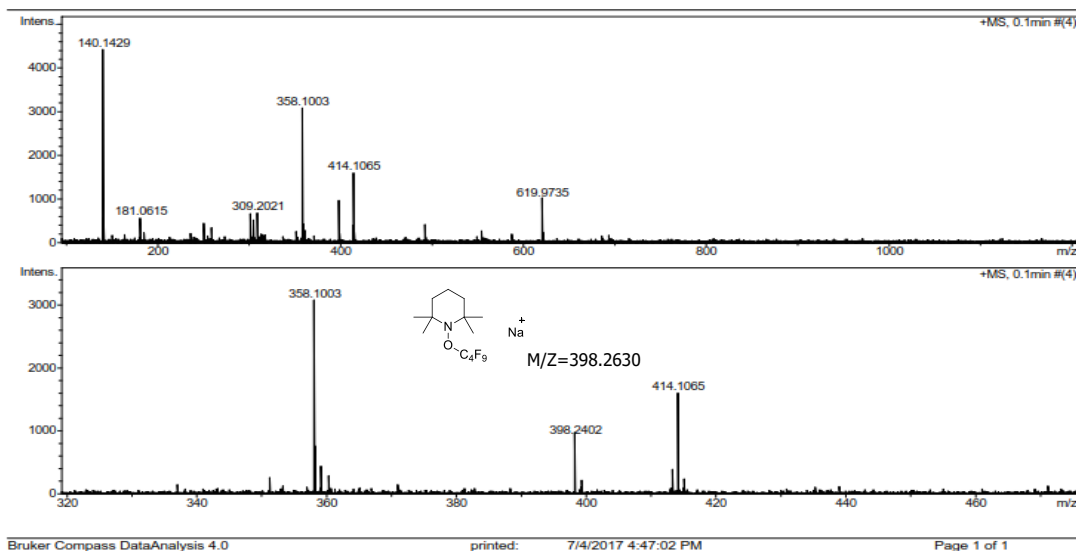

### HRMS-ESI

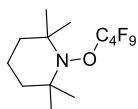

**2,2,6,6-tetramethyl-1-(perfluorobutoxy)piperidine (16)**, Colorless liquid;

$^1\text{H}$  NMR (300 MHz,  $\text{CDCl}_3$ )  $\delta$  1.57 (s, 6H), 1.18 (s, 12H).

$^{13}\text{C}$  NMR (75 MHz,  $\text{CDCl}_3$ )  $\delta$  61.88, 40.42, 33.43, 20.63, 16.78.

$^{19}\text{F}$  NMR (282 MHz,  $\text{CDCl}_3$ )  $\delta$  -78.84 (t,  $J = 5.4$  Hz, 2F), -81.04 (t,  $J = 9.9$  Hz, 3F), -124.52—124.64 (m, 2F), -126.10 (d,  $J = 3.4$  Hz, 2F).

**HRMS (ESI):**  $\text{C}_{13}\text{H}_{18}\text{F}_9\text{NO} + \text{Na}^+$  Calcd: 398.2630, Found: 398.2402.

### 5.2 Control experiments

To further prove the reaction as a multicomponent reaction, control experiment was carried out. Under the standard conditions, in the absence of TMSCN, no iodoperfluorobutylated product could be observed, and the *p*-methylstyrene (**2a**) was mostly consumed, thus questioning vinyl iodides as effective intermediates in these transformations.

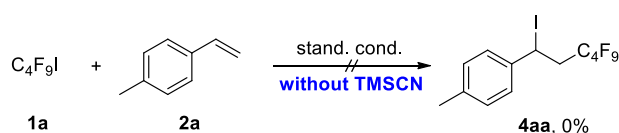

### $^1\text{H}$ NMR of *p*-methylstyrene (**2a**)

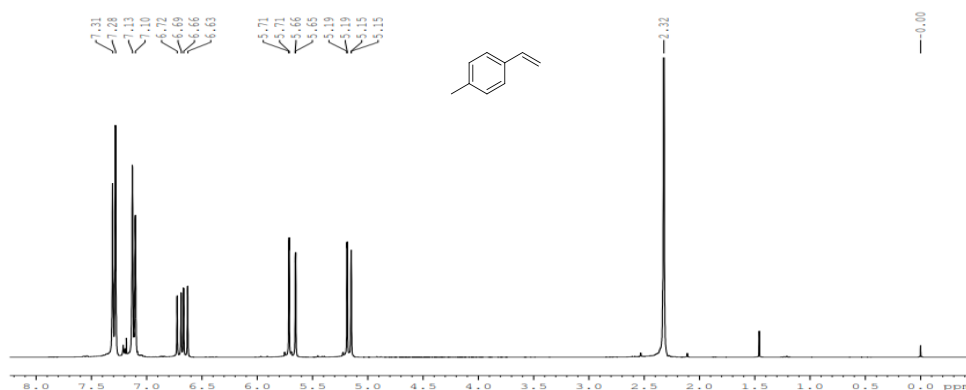

### Crude $^1\text{H}$ NMR of standard reaction

Crude  $^1\text{H}$  NMR of standard reaction

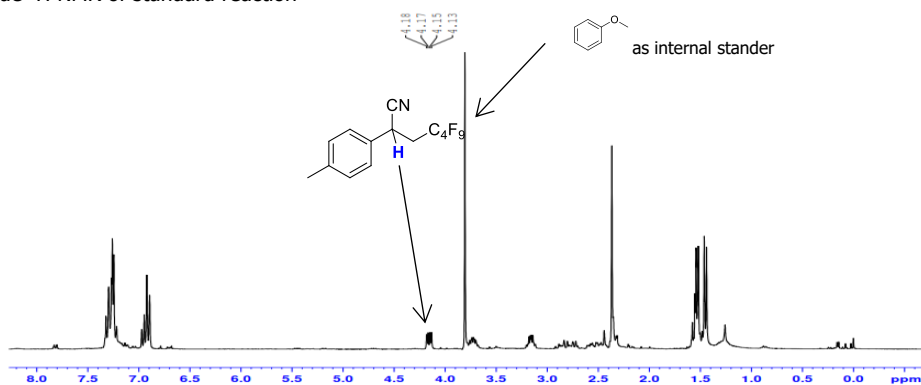

### Crude $^1\text{H}$ NMR (under the standard conditions, in the absence of TMSCN)

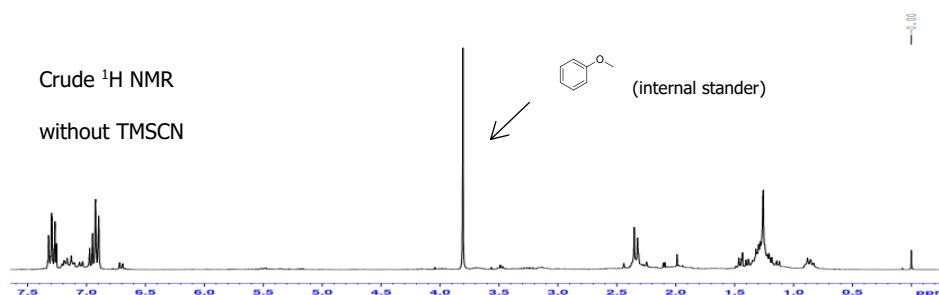

To explore the influence of DIPEA in the reaction, control experiment was carried out. Under the standard conditions, in the absence of DIPEA, no **4a** were observed, whereas the iodoperfluoroalkylation product **4aa** was obtained in 12% yield and *p*-methylstyrene (**2a**) was mostly consumed. Furthermore, to explore the influence of bases, a series of inorganic bases were used instead of DIPEA. However, no **4a** or **4aa** were observed, and *p*-methylstyrene (**2a**) was mostly consumed. The negative results demonstrated the importance of DIPEA in this reaction.

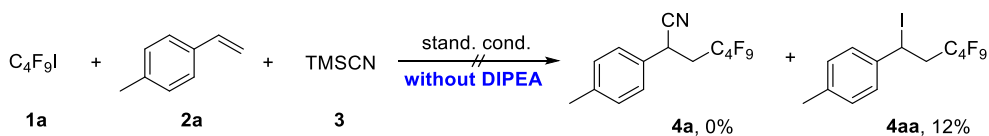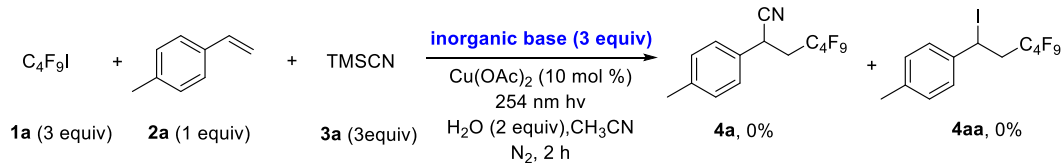

inorganic bases = *t*-BuOK, *t*-BuONa, *t*-BuOLi, Na<sub>2</sub>CO<sub>3</sub>, Cs<sub>2</sub>CO<sub>3</sub>, NaOH, and PhCO<sub>2</sub>Na.

### Crude <sup>1</sup>H NMR (under the standard conditions, in the absence of DIPEA)

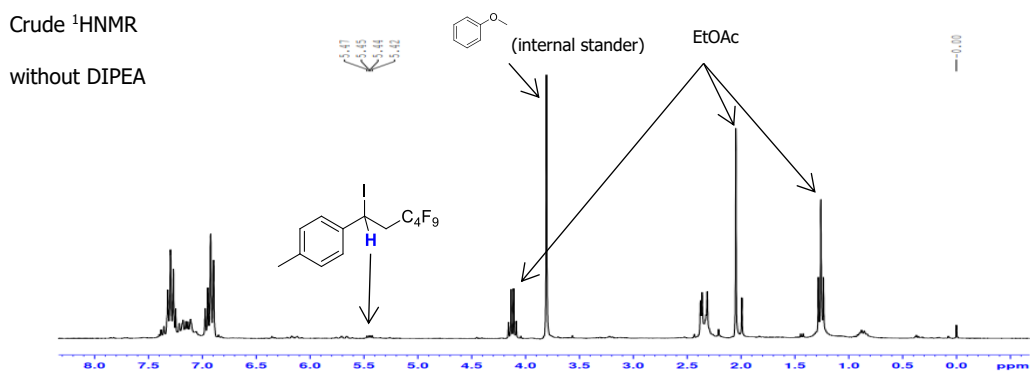

### NMR spectra of 4aa

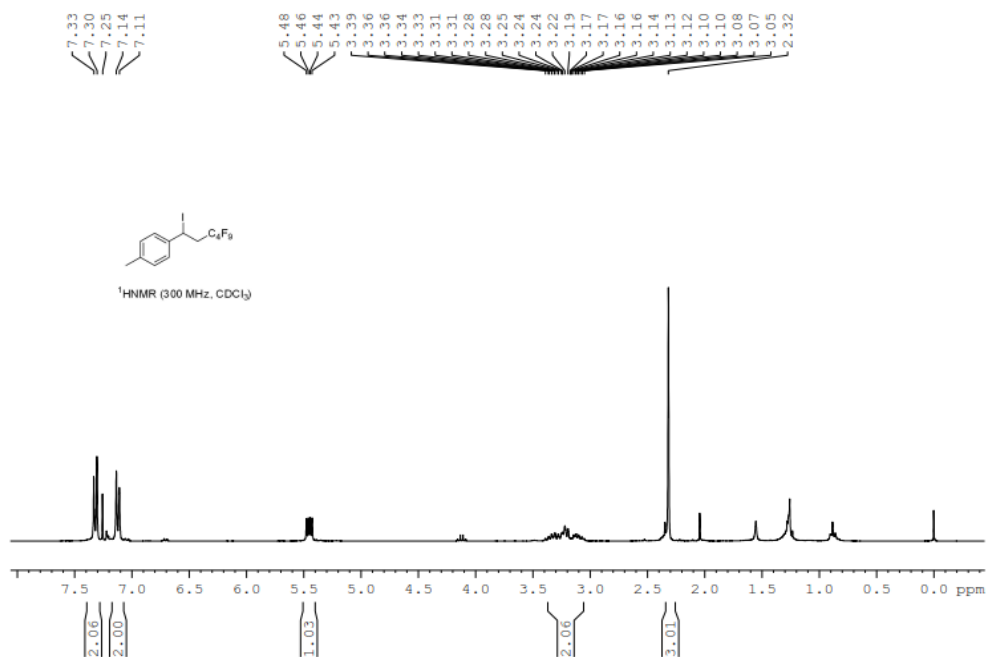



$^{13}\text{C}$  NMR (75 MHz,  $\text{CDCl}_3$ )  $\delta$  139.84, 138.59, 129.57, 126.55, 42.14 (t,  $J = 20.3$  Hz), 21.20, 16.92.

$^{19}\text{F}$  NMR (282 MHz,  $\text{CDCl}_3$ )  $\delta$  -81.03 (t,  $J = 8.5$  Hz, 3F), -112.10—-115.61 (m, 2F), -124.52 (d,  $J = 8.5$  Hz, 2F), -125.96 (d,  $J = 14.1$  Hz, 2F).

Under standard conditions, **4aa** could react with TMS-CN and gave the cross coupling product **4a** in 87% yield.

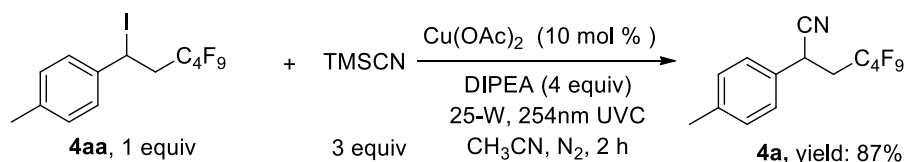

### 5.3 Proposed mechanism<sup>6</sup>

Although multiple scenarios can be envisaged, based on these investigations and previous reports, a plausible mechanism was proposed. Firstly, the rapid ligand exchange delivered the  $\text{Cu}^{\text{II}}$  species, which was reduced by the electron rich *tert*-amine and formed an amine radical cation and  $\text{Cu}^{\text{I}}$ . Under UV light irradiation,  $\text{Cu}^{\text{I}}$  was excited to its triplet state  $[\text{Cu}^{\text{I}}]^*$ . The following oxidative quenching step converted  $\text{R}_f\text{I}$  into  $\cdot\text{R}_f$  and  $\text{I}^-$  along with recycling of  $\text{Cu}^{\text{II}}$ . Meanwhile,  $\cdot\text{R}_f$  attacked alkene to give the radical intermediate **A**. Then, it reacted with  $\text{Cu}^{\text{II}}(\text{CN})_n$  and formed a  $\text{Cu}^{\text{III}}$  species **B**. The subsequent reductive elimination provided the desired cyanofluoroalkylation product. It should be noted that both  $\text{Cu}^{\text{I}}$  and  $\text{Cu}^{\text{II}}$  salts showed good catalytic activities. These results indicated that the catalytic cycle could be initiated either from  $\text{Cu}^{\text{II}}$  or  $\text{Cu}^{\text{I}}$ . Unstable species  $\text{TMS}^+$  and  $\text{I}^-$  undergo rapid hydrolysis and then neutralized by amine, which promoted a completed conversion.

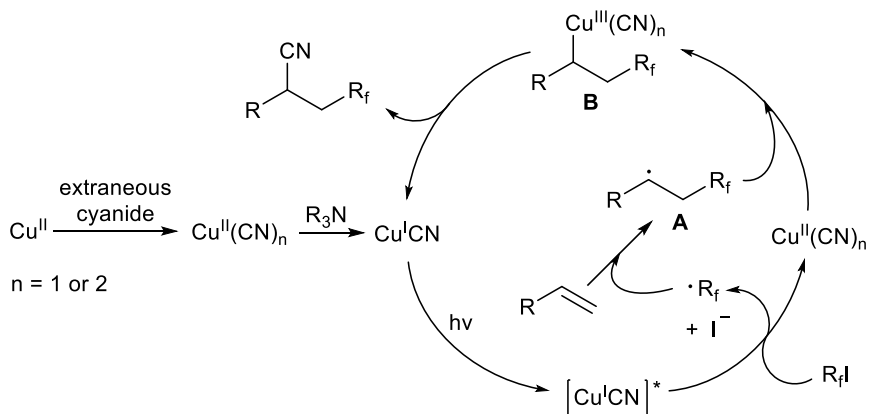

## 6. References

1. T. Ramnial, S. A. Taylor, M. L. Bender, B. Gorodetsky, P. T. K. Lee, D. A. Dickie, B. M. McCollum, C. C. Pye, C. J. Walsby, J. A. C. Clyburne, *J. Org. Chem.* **2008**, 73, 801.
2. J. Zhang, Y. Tang, *Adv. Synth. Catal.* **2016**, 358, 752.
3. G. Ding, B. Lu, Y. Li, J. Wan, Z. Zhang, X. Xie, *Adv. Synth. Catal.* **2015**, 357, 1013.
4. L. Crespin, L. Biancalana, T. Morack, D. C. Blakemore, S. V. Ley, *Org. Lett.* **2017**, 19, 1084.

5. Y. He, L. Li, Y. Yang, Z. Zhou, H. Hua, X. Liu, Y.-M. Liang, *Org. Lett.* **2014**, *16*, 270.  
 6. a) S. Paria, O. Reiser, *ChemCatChem.* **2014**, *6*, 2477. b) O. Reiser, *Acc. Chem. Res.* **2016**, *49*, 1990. c) A. C. Hernandez-Perez, S. K. Collins, *Acc. Chem. Res.* **2016**, *49*, 1557. d) T. S. Ratani, S. Bachman, G. C. Fu, J. C. Peters, *J. Am. Chem. Soc.* **2015**, *137*, 13902. e) A. Baralle, L. Fensterbank, J.-P. Goddard, C. Ollivier, *Chem. Eur. J.* **2013**, *19*, 10809. f) B. Michelet, C. Deldaele, S. Kajouj, C. Moucheron, G. Evano, *Org. Lett.* **2017**, *19*, 3576.

## 7. Characterization of products

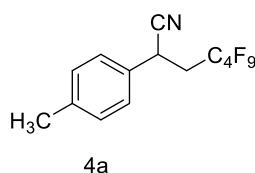

**4,4,5,5,6,6,7,7,7-nonafluoro-2-(p-tolyl)heptanenitrile (4a)**, 132.3mg, yield: 91%.

White solid, mp 44-45°C.

<sup>1</sup>H NMR (300 MHz, CDCl<sub>3</sub>) δ 7.25 (q, *J* = 8.4 Hz, 4H), 4.15 (dd, *J* = 4.5, 9.8 Hz, 1H), 2.72-2.82 (m, 1H), 2.42-2.61 (m, 1H), 2.37 (s, 3H).

<sup>13</sup>C NMR (75 MHz, CDCl<sub>3</sub>) δ 139.09, 130.81, 130.26, 127.06, 118.97, 37.02 (t, *J* = 21.0 Hz), 29.32 (d, *J* = 3.8 Hz), 21.04.

<sup>19</sup>F NMR (282 MHz, CDCl<sub>3</sub>) δ -81.08—-81.12(m, 3F), -112.85—-113.88 (m, 1F), -114.07—-115.09 (m, 1F), -124.37—-124.47 (m, 2F), -125.93—-126.09 (m, 2F).

**HRMS (ESI):** C<sub>14</sub>H<sub>10</sub>F<sub>9</sub>N+Na<sup>+</sup> Calcd: 386.0562, Found: 386.0566.

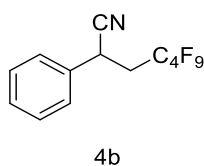

**4,4,5,5,6,6,7,7,7-nonafluoro-2-phenylheptanenitrile (4b)**, 121.5mg, yield: 87%.

Light yellow liquid

<sup>1</sup>H NMR (300 MHz, CDCl<sub>3</sub>) δ 7.26–7.45 (m, 5H), 4.19 (dd, *J* = 4.5, 9.9 Hz, 1H), 2.75 - 2.95 (m, 1H), 2.33 - 2.64 (m, 1H).

<sup>13</sup>C NMR (75 MHz, CDCl<sub>3</sub>) δ 133.78, 129.68, 129.09, 127.22, 118.77, 37.02, 29.73.

<sup>19</sup>F NMR (282 MHz, CDCl<sub>3</sub>) δ -80.98 (m, 3F), -113.73—-114.03 (m, 2F), -124.36 (dd, *J* = 12.7, 8.7 Hz, 2F), -125.93 (dd, *J* = 12.7, 8.7 Hz, 2F).

**HRMS (EI):** C<sub>13</sub>H<sub>8</sub>F<sub>9</sub>N Calcd: 349.0513, Found: 349.0516.

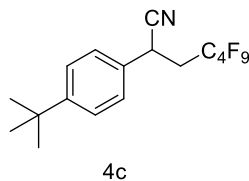

**2-(4-(tert-butyl)phenyl)-4,4,5,5,6,6,7,7,7-nonafluoroheptanenitrile (4c)**, 139.4mg, yield:86%. Light yellow liquid

<sup>1</sup>H NMR (300 MHz, CDCl<sub>3</sub>) δ 7.45 (d, *J* = 8.4 Hz, 2H), 7.32 (d, *J* = 8.4 Hz, 2H), 4.16 (dd, *J* = 10.1, 4.2 Hz, 1H), 2.73 - 2.93 (m, 1H), 2.41 - 2.62 (m, 1H), 1.33 (s, 9H).

<sup>13</sup>C NMR (75 MHz, CDCl<sub>3</sub>) δ 152.29, 130.76, 126.89, 126.60, 118.96, 37.03 (t, *J* = 21 Hz), 34.66, 31.16, 29.21.

<sup>19</sup>F NMR (282 MHz, CDCl<sub>3</sub>) δ -81.11—-81.04 (m, 3F), -112.78—-113.84 (m, 1F), -114.16—-115.22 (m, 1F), -124.44 (d, *J* = 8.5 Hz, 2F), -125.99 (t, *J* = 14.1 Hz, 2F).

**HRMS (ESI):** C<sub>17</sub>H<sub>16</sub>F<sub>9</sub>N+Na<sup>+</sup> Calcd: 428.1031, Found: 428.1037.

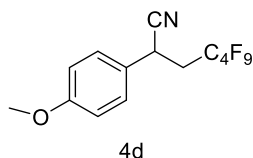

**4,4,5,5,6,6,7,7,7-nonafluoro-2-(4-methoxyphenyl)heptanenitrile (4d)**, 130.4mg, yield: 86%. Light yellow liquid.

$^1\text{H NMR}$  (300 MHz,  $\text{CDCl}_3$ )  $\delta$  7.29 (d,  $J = 8.2$  Hz, 2H), 6.94 (d,  $J = 8.7$  Hz, 2H), 4.15 (dd,  $J = 9.7, 4.6$  Hz, 1H), 3.82 (s, 3H), 2.71–2.92 (m, 1H), 2.41–2.60 (m, 1H).

$^{13}\text{C NMR}$  (75 MHz,  $\text{CDCl}_3$ )  $\delta$  159.99, 128.42, 125.63, 119.07, 114.93, 55.36, 37.04 (t,  $J = 21$  Hz), 28.98.

$^{19}\text{F NMR}$  (282 MHz,  $\text{CDCl}_3$ )  $\delta$  -81.05– -81.12 (m, 3F), -112.03– -114.05 (m, 1F), -114.35 (dd,  $J = 149.2, 136.3$  Hz, 1F), -123.17– -125.15 (m, 2F), -126.00 (dd,  $J = 16.0, 7.6$  Hz, 2F).

**HRMS (ESI):**  $\text{C}_{14}\text{H}_{10}\text{F}_9\text{NO} + \text{Na}^+$  Calcd: 402.0511, Found: 402.0523.

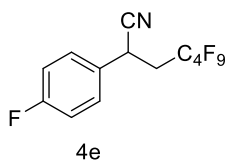

**4,4,5,5,6,6,7,7,7-nonafluoro-2-(4-fluorophenyl)heptanenitrile (4e)**, 130.7mg, yield: 89%. Light yellow liquid.

$^1\text{H NMR}$  (300 MHz,  $\text{CDCl}_3$ )  $\delta$  7.36–7.41 (m, 2H), 7.13 (t,  $J = 8.7$  Hz, 2H), 4.21 (dd,  $J = 9.7, 4.6$  Hz, 1H), 2.74–2.94 (m, 1H), 2.44–2.62 (m, 1H).

$^{13}\text{C NMR}$  (75 MHz,  $\text{CDCl}_3$ )  $\delta$  162.90 (d,  $J = 247.5$  Hz), 129.60 (d,  $J = 3.8$  Hz), 129.12 (d,  $J = 3.8$  Hz), 118.63, 116.69 (d,  $J = 21.8$  Hz), 36.88 (t,  $J = 21.0$  Hz), 29.09.

$^{19}\text{F NMR}$  (282 MHz,  $\text{CDCl}_3$ )  $\delta$  -81.17 (t,  $J = 9.3$  Hz, 3F), -112.10 (d,  $J = 2.1$  Hz, 1F), -113.84–114.05 (m, 2F), -114.48 (d,  $J = 2.8$  Hz, 2F), -126.09 (dd,  $J = 16.0, 7.6$  Hz, 2F).

**HRMS (ESI):**  $\text{C}_{13}\text{H}_7\text{F}_{10}\text{N} + \text{Na}^+$  Calcd: 390.0311, Found: 390.0322.

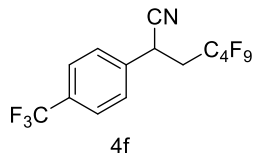

**4,4,5,5,6,6,7,7,7-nonafluoro-2-(4-(trifluoromethyl)phenyl)heptanenitrile (4f)**, 145.1mg, yield: 87%. Light yellow liquid.

$^1\text{H NMR}$  (300 MHz,  $\text{CDCl}_3$ )  $\delta$  7.72 (d,  $J = 8.2$  Hz, 2H), 7.55 (d,  $J = 8.2$  Hz, 2H), 4.28 (dd,  $J = 9.4, 4.8$  Hz, 1H), 2.78–2.98 (m, 1H), 2.47–2.67 (m, 1H).

$^{13}\text{C NMR}$  (75 MHz,  $\text{CDCl}_3$ )  $\delta$  137.61, 131.58 (d,  $J = 33$  Hz), 127.85, 126.67 (t,  $J = 3.0$  Hz), 123.52 (d,  $J = 270$  Hz), 118.00, 36.69 (t,  $J = 21.8$  Hz), 29.65.

$^{19}\text{F NMR}$  (282 MHz,  $\text{CDCl}_3$ )  $\delta$  -63.04 (s, 3F), -81.06– -81.14 (m, 3F), -111.58– -113.81 (m, 2F), -124.30– -124.43 (m, 2F), -125.98 (dd,  $J = 11.7, 9.1$  Hz, 2F).

**HRMS (ESI):**  $\text{C}_{14}\text{H}_7\text{F}_{12}\text{N} + \text{Na}^+$  Calcd: 440.0285, Found: 440.0292.

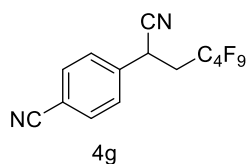

**4-(1-cyano-3,3,4,4,5,5,6,6,6-nonafluorohexyl)benzonitrile (4g)**, 113.7mg, yield: 76%. Light yellow liquid.

**<sup>1</sup>H NMR** (300 MHz, CDCl<sub>3</sub>) δ 7.77 (d, *J* = 8.3 Hz, 2H), 7.56 (d, *J* = 8.2 Hz, 2H), 4.29 (dd, *J* = 9.1, 5.0 Hz, 1H), 2.78–2.99 (m, 1H), 2.48–2.67 (m, 1H).

**<sup>13</sup>C NMR** (75 MHz, CDCl<sub>3</sub>) δ 138.63, 133.40, 128.29, 117.68, 117.64, 113.48, 36.45 (t, *J* = 21.0 Hz), 29.87.

**<sup>19</sup>F NMR** (282 MHz, CDCl<sub>3</sub>) δ -80.99– -81.07 (m, 3F), -112.86– -113.98 (m, 2F), -124.30 (t, *J* = 32.5 Hz, 2F), -125.88– -125.98 (m, 2F).

**HRMS (ESI):** C<sub>14</sub>H<sub>7</sub>F<sub>9</sub>N<sub>2</sub>+Na<sup>+</sup> Calcd: 397.0363, Found: 397.0361.

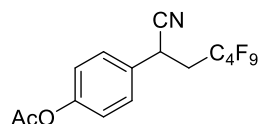

4h

**4-(1-cyano-3,3,4,4,5,5,6,6,6-nonafluorohexyl)phenyl acetate (4h)**, 127.0mg, yield:78%.

White solid, mp 44-45°C.

**<sup>1</sup>H NMR** (300 MHz, CDCl<sub>3</sub>) δ 7.42 (d, *J* = 8.6 Hz, 2H), 7.18 (d, *J* = 8.8 Hz, 2H), 4.20 (dd, *J* = 9.9, 4.4 Hz, 1H), 2.68–2.94 (m, 1H), 2.45–2.63 (m, 1H), 2.32 (s, 3H).

**<sup>13</sup>C NMR** (75 MHz, CDCl<sub>3</sub>) δ 169.21, 151.06, 131.20, 128.45, 122.97, 118.54, 37.03, 28.80, (t, *J* = 21.0 Hz), 21.11.

**<sup>19</sup>F NMR** (282 MHz, CDCl<sub>3</sub>) δ -80.92– -81.01 (m, 3F), -112.48– -113.89 (m, 1F), -113.97– -115.19 (m, 1F), -124.36(d, *J* = 8.5 Hz, 2F), -125.92 (dd, *J* = 12.8, 8.6 Hz, 2F).

**HRMS (ESI):** C<sub>15</sub>H<sub>10</sub>F<sub>9</sub>NO<sub>2</sub>+Na<sup>+</sup> Calcd: 430.0460, Found: 430.0462.

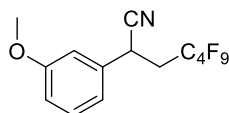

4i

**4,4,5,5,6,6,7,7,7-nonafluoro-2-(3-methoxyphenyl)heptanenitrile (4i)**, 127.4mg, yield:84%.

Light yellow liquid.

**<sup>1</sup>H NMR** (300 MHz, CDCl<sub>3</sub>) δ 7.35 (t, *J* = 11.5, 1H), 6.94 (dd, *J* = 10.8, 7.4 Hz, 3H), 4.15 (dd, *J* = 9.9, 4.3 Hz, 1H), 3.84 (s, 3H), 2.74 - 2.94 (m, 1H), 2.44 - 2.64 (m, 1H).

**<sup>13</sup>C NMR** (75 MHz, CDCl<sub>3</sub>) δ 160.41, 135.19, 130.77, 119.29, 118.69, 114.28, 113.10, 55.40, 36.99 (t, *J* = 21.0 Hz), 29.68.

**<sup>19</sup>F NMR** (282 MHz, CDCl<sub>3</sub>) δ -79.72– -81.94 (m, 3F), -111.82– -113.88 (m, 1F), -113.79– -115.69 (m, 1F), -124.35(dd, *J* = 12.7, 5.7 Hz, 2F), -125.58– -126.61 (m, 2F).

**HRMS (ESI):** C<sub>14</sub>H<sub>10</sub>F<sub>9</sub>NO+Na<sup>+</sup> Calcd: 402.0511, Found: 402.0525.

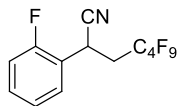

4j

**4,4,5,5,6,6,7,7,7-nonafluoro-2-(2-fluorophenyl)heptanenitrile (4j)**, 126.3mg, yield: 86%.

Light yellow liquid.

**<sup>1</sup>H NMR** (300 MHz, CDCl<sub>3</sub>) δ 7.37–7.55 (m, 2H), 7.12–7.27 (m, 2H), 4.48 (dd, *J* = 9.4, 4.7 Hz, 1H), 2.67–2.94 (m, 1H), 2.51–2.66 (m, 1H).

**<sup>13</sup>C NMR** (75 MHz, CDCl<sub>3</sub>) δ 159.63 (d, *J* = 246.8 Hz), 131.25 (d, *J* = 8.3 Hz), 129.03 (d, *J* = 2.6 Hz), 125.27 (d, *J* = 3.7 Hz), 120.94 (d, *J* = 13.6 Hz), 117.80, 116.35 (d, *J* = 21.0 Hz), 35.12 (t, *J* = 21.0 Hz), 24.23.

**<sup>19</sup>F NMR** (282 MHz, CDCl<sub>3</sub>) δ -80.00– -81.10 (m, 3F), -112.91– -115.53 (m, 2F), -117.57 (s, 1F), -124.35– -124.46 (m, 2F), -125.91– -126.02 (m, 2F).

**HRMS (ESI):** C<sub>13</sub>H<sub>7</sub>F<sub>10</sub>N+Na<sup>+</sup> Calcd: 390.0311, Found: 390.0330.



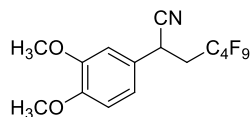

4k

**2-(3,4-dimethoxyphenyl)-4,4,5,5,6,6,7,7,7-nonafluoroheptanenitrile (4k)**, 142.4mg, yield:87%. Light yellow liquid.

**<sup>1</sup>H NMR** (300 MHz, CDCl<sub>3</sub>) δ 6.84–6.95 (m, 3H), 4.13 (dd, *J* = 9.8, 4.5 Hz, 1H), 3.92 (d, 3H), 3.90 (s, 3H), 2.73–2.94 (m, 1H), 2.43–2.63 (m, 1H).

**<sup>13</sup>C NMR** (75 MHz, CDCl<sub>3</sub>) δ 149.77, 149.55, 126.00, 119.65, 118.99, 111.71, 109.95, 56.07, 56.00, 36.83 (t, *J* = 21.0 Hz), 29.38.

**<sup>19</sup>F NMR** (282 MHz, CDCl<sub>3</sub>) δ -81.96– -81.05 (m, 3F), -112.13– -113.99 (m, 1F), -113.99– -115.61 (m, 1F), -122.97– -125.25 (m, 2F), -124.83– -126.45 (m, 2F).

**HRMS (ESI):** C<sub>15</sub>H<sub>12</sub>F<sub>9</sub>NO<sub>2</sub>+Na<sup>+</sup> Calcd: 432.0617, Found: 432.0638.

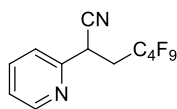

4l

**4,4,5,5,6,6,7,7,7-nonafluoro-2-(pyridin-2-yl)heptanenitrile (4l)**, 119.0mg, yield: 85%.

Light yellow liquid.

**<sup>1</sup>H NMR** (300 MHz, CDCl<sub>3</sub>) δ 8.64 (d, *J* = 4.5 Hz, 1H), 7.79 (td, *J* = 7.7, 1.6 Hz, 1H), 7.55 (d, *J* = 7.8 Hz, 1H), 7.21-7.36 (m, 1H), 4.36 (dd, *J* = 9.2, 4.8 Hz, 1H), 2.7-83.16(m, 2H).

**<sup>13</sup>C NMR** (75 MHz, CDCl<sub>3</sub>) δ 152.32, 150.27, 137.79, 123.80, 122.17, 118.16, 34.18 (t, *J* = 21.0 Hz), 31.69

**<sup>19</sup>F NMR** (282 MHz, CDCl<sub>3</sub>) δ -80.99 - -81.07 (m, 3F), -111.09 - -113.50 (m,1F), -113.64 - -116.35 (m,1F), -122.57 - -125.15 (m, 2F), -125.97 (td, *J* = 12.7, 4.2 Hz, 2F).

**HRMS (ESI):** C<sub>12</sub>H<sub>7</sub>F<sub>9</sub>N<sub>2</sub>+Na<sup>+</sup> Calcd: 373.0363, Found: 373.0365.

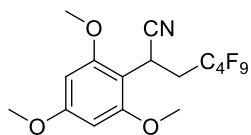

4m

**4,4,5,5,6,6,7,7,7-nonafluoro-2-(2,4,6-trimethoxyphenyl)heptanenitrile (4m)**, 100.1mg, yield:57%. Light yellow liquid.

**<sup>1</sup>H NMR** (300 MHz, CDCl<sub>3</sub>) δ 6.14 (s, 2H), 4.81 (dd, *J* = 8.4, 5.4 Hz, 1H), 3.88 (s, 6H), 3.82 (s, 3H), 2.90–3.12 (m, 1H), 2.33–2.54 (m, 1H).

**<sup>13</sup>C NMR** (75 MHz, CDCl<sub>3</sub>) δ 161.90, 158.33, 119.50, 102.70, 90.92, 55.95, 55.41, 33.02, 31.59, 18.02.

**<sup>19</sup>F NMR** (282 MHz, CDCl<sub>3</sub>) δ -81.00– -81.10 (m, 3F), -113.64– -114.74 (m, 1F), -115.27– -116.33 (m, 1F), -124.43– -124.52 (m, 2F), -125.95– -126.04 (m, 2F).

**HRMS (ESI):** C<sub>16</sub>H<sub>14</sub>F<sub>9</sub>NO<sub>3</sub>+Na<sup>+</sup> Calcd: 462.0722, Found: 462.0746.

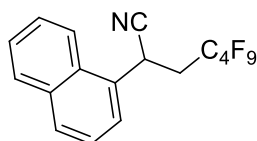

4n

**4,4,5,5,6,6,7,7,7-nonafluoro-2-(naphthalen-1-yl)heptanenitrile (4n)**, 118.1mg, yield: 74%. Light yellow liquid.

**<sup>1</sup>H NMR** (300 MHz, CDCl<sub>3</sub>) δ 7.77–7.97 (m, 4H), 7.51–7.68 (m, 3H), 4.96 (dd, *J* = 10.5, 2.5 Hz, 1H), 2.85–3.02 (m, 1H), 2.59–2.82 (m, 1H).

**<sup>13</sup>C NMR** (75 MHz, CDCl<sub>3</sub>) δ 134.21, 130.10, 129.73, 129.18, 129.09, 127.78, 126.59, 126.08, 125.55, 121.03, 119.05, 36.03 (t, *J* = 21.8 Hz), 26.60.

**<sup>19</sup>F NMR** (282 MHz, CDCl<sub>3</sub>) δ -80.97 (dd, *J* = 9.5, 2.8 Hz, 3F), -111.28– -114.04 (m, 1F), -114.76 (dd, *J* = 147.9, 134.8 Hz, 1F), -124.30 (d, *J* = 8.8 Hz, 2F), -125.85 (t, *J* = 11.3 Hz, 2F).

**HRMS (ESI):** C<sub>17</sub>H<sub>10</sub>F<sub>9</sub>N+Na<sup>+</sup> Calcd: 422.0562, Found: 422.0583.

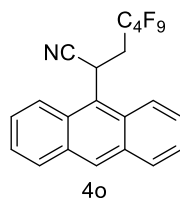

**2-(anthracen-9-yl)-4,4,5,5,6,6,7,7,7-nonafluoroheptanenitrile (4o)**, 120.4mg, yield: 67%.

Light yellow liquid

**<sup>1</sup>H NMR** (300 MHz, CDCl<sub>3</sub>) δ 7.60 (d, *J* = 7.4 Hz, 1H), 7.54–7.29 (m, 7H), 6.08 (t, *J* = 7.8 Hz, 1H), 4.78 (t, *J* = 16.2 Hz, 1H), 3.68 (dd, *J* = 17.8, 7.8 Hz, 1H), 3.48 (dd, *J* = 17.9, 7.8 Hz, 1H).

**<sup>13</sup>C NMR** (75 MHz, CDCl<sub>3</sub>) δ 140.35, 139.51, 135.25, 130.97, 130.73, 130.08, 128.92, 128.34, 128.03, 127.43, 127.37, 124.58, 117.91, 114.72, 48.94 (t, *J* = 22.5 Hz), 18.48.

**<sup>19</sup>F NMR** (282 MHz, CDCl<sub>3</sub>) δ -79.55– -82.64 (m, 3F), -111.62– -111.83 (m, 2F), -119.37– -119.45 (m, 2F), -125.74– -125.93 (m, 2F).

**HRMS (ESI):** C<sub>21</sub>H<sub>12</sub>F<sub>9</sub>N+Na<sup>+</sup> Calcd: 472.0718, Found: 472.0715.

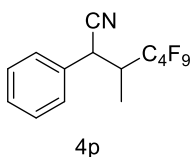

**4,4,5,5,6,6,7,7,7-nonafluoro-3-methyl-2-phenylheptanenitrile (4p)**, 69.7mg, yield: 48%.

Colourless liquid.

**<sup>1</sup>H NMR** (300 MHz, CDCl<sub>3</sub>) δ 7.37–7.48 (m, 5H), 4.48 (d, *J* = 2.1 Hz, 1H), 2.59–2.72 (m, 1H), 1.27 (d, *J* = 7.0 Hz, 3H) .

**<sup>13</sup>C NMR** (75 MHz, CDCl<sub>3</sub>) δ 132.92, 129.41, 128.81, 127.60, 116.86, 41.99 (t, *J* = 20.3 Hz), 36.06, 8.49.

**<sup>19</sup>F NMR** (282 MHz, CDCl<sub>3</sub>) δ -79.74– -81.79 (m, 3F), -113.10– -115.01 (m, 1F), -117.23– -118.71 (m, 1F), -119.78– -121.26 (m, 1F), -121.26– -122.83 (m, 1F), -124.24– -125.88 (m, 1F), -125.96– -127.70 (m, 1F).

**HRMS (ESI):** C<sub>14</sub>H<sub>10</sub>F<sub>9</sub>N+Na<sup>+</sup> Calcd: 386.0562, Found: 386.0555.

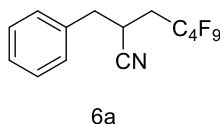

**2-benzyl-4,4,5,5,6,6,7,7,7-nonafluoroheptanenitrile (6a)**, 114.7mg, yield: 79%.

White solid, mp 43 °C

**<sup>1</sup>H NMR** (300 MHz, CDCl<sub>3</sub>) δ 7.27–7.41 (m, 5H), 3.17–3.27 (m, 1H), 3.28–3.10 (m, 2H), 2.23–2.60 (m, 2H).

**<sup>13</sup>C NMR** (75 MHz, CDCl<sub>3</sub>) δ 134.97, 129.09, 127.99, 119.53, 38.38, 32.61, 25.94.

**<sup>19</sup>F NMR** (282 MHz, CDCl<sub>3</sub>) δ -80.96– -81.05 (m, 3F), -112.29– -114.63 (m, 2F), -124.30– -126.02 (m, 4F).

**HRMS (ESI):** C<sub>14</sub>H<sub>10</sub>F<sub>9</sub>N+Na<sup>+</sup> Calcd: 386.0567, Found: 386.0565.

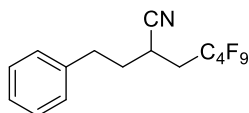

6b

**4,4,5,5,6,6,7,7,7-nonafluoro-2-phenethylheptanenitrile (6b)**, 125.2mg, yield: 83%.

Yellow liquid

$^1\text{H NMR}$  (300 MHz,  $\text{CDCl}_3$ )  $\delta$  7.19–7.36 (m, 5H), 2.88–3.01 (m, 2H), 2.71–2.89 (m, 1H), 2.41–2.67(m, 1H), 2.28–2.39 (m, 1H), 1.96–2.19 (m, 2H).

$^{13}\text{C NMR}$  (75 MHz,  $\text{CDCl}_3$ )  $\delta$  139.04, 128.85, 128.37, 126.80, 119.65, 34.27, 33.39 (t,  $J = 21.0$  Hz), 32.82, 23.52.

$^{19}\text{F NMR}$  (282 MHz,  $\text{CDCl}_3$ )  $\delta$  -81.01– -81.10 (m, 3F), -113.58– -113.82 (m, 2F), -124.41– -124.53 (m, 2F), -125.93– -126.04 (m, 2F).

**HRMS (ESI):**  $\text{C}_{15}\text{H}_{12}\text{F}_9\text{N}+\text{Na}^+$  Calcd: 400.0718, Found: 400.0717.

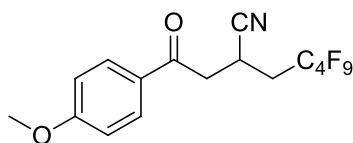

6c

**4,4,5,5,6,6,7,7,7-nonafluoro-2-(2-(4-methoxyphenyl)-2-oxoethyl)heptanenitrile. (6c)**,

116.2mg, yield: 69%. White solid, mp 125-126°C.

$^1\text{H NMR}$  (300 MHz,  $\text{CDCl}_3$ )  $\delta$  7.93 (d,  $J = 8.2$  Hz, 2H), 6.97 (d,  $J = 8.4$  Hz, 2H), 3.90 (s, 3H), 3.67 (s, 1H), 3.35 – 3.55 (m, 2H), 2.49–2.68 (m, 2H).

$^{13}\text{C NMR}$  (75 MHz,  $\text{CDCl}_3$ )  $\delta$  192.39, 164.38, 130.44, 128.39, 119.83, 114.13, 55.60, 39.86, 32.56, 19.43.

$^{19}\text{F NMR}$  (282 MHz,  $\text{CDCl}_3$ )  $\delta$  -80.98 (t,  $J = 9.0$  Hz, 2F), -112.41– -114.81 (m, 2F), -124.34(d,  $J = 7.8$  Hz, 2F), -125.90 (t,  $J = 10.4$  Hz, 3F).

**HRMS (ESI):**  $\text{C}_{16}\text{H}_{12}\text{F}_9\text{NO}_2+\text{Na}^+$  Calcd: 4444.0622, Found: 444.0616.

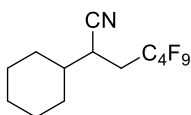

6d

**2-cyclohexyl-4,4,5,5,6,6,7,7,7-nonafluoroheptanenitrile (6d)**, 130.7mg, yield: 92%.

White solid, mp 43-44°C

$^1\text{H NMR}$  (300 MHz,  $\text{CDCl}_3$ )  $\delta$  2.72–2.98 (m, 1H), 2.40–2.70. (m, 1H), 2.12–2.40 (m, 1H), 1.68–2.00(m, 5H), 1.59 (s, 1H), 1.27–1.36 (m, 5H).

$^{13}\text{C NMR}$  (75 MHz,  $\text{CDCl}_3$ )  $\delta$  119.13, 39.96, 31.42 (t,  $J = 21.8$  Hz), 30.01, 28.47, 25.78, 25.58.

$^{19}\text{F NMR}$  (282 MHz,  $\text{CDCl}_3$ )  $\delta$  -81.12 (dd,  $J = 8.0, 4.8$  Hz, 3F), -112.14– -116.35 (m, 2F), -123.04– -125.49 (m, 2F), -125.16– -126.96 (m, 2F).

**HRMS (ESI):**  $\text{C}_{13}\text{H}_{14}\text{F}_9\text{N}+\text{Na}^+$  Calcd: 378.0875, Found: 378.0883.

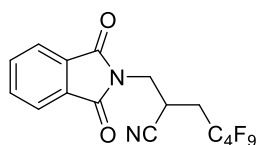

6e

**2-((1,3-dioxoisindolin-2-yl)methyl)-4,4,5,5,6,6,7,7,7-nonafluoroheptanenitrile (6e),**

146.9mg, yield:85%. White solid, mp 111-112°C.

<sup>1</sup>H NMR (300 MHz, CDCl<sub>3</sub>) δ 7.92 (dd, *J* = 5.5, 3.0 Hz, 2H), 7.79 (dd, *J* = 5.5, 3.1 Hz, 2H), 4.14 (dd, *J* = 13.8, 7.9 Hz, 1H), 3.95 (dd, *J* = 13.8, 6.8 Hz, 1H), 3.53–3.63 (m, 1H), 2.38–2.77 (m, 2H).

<sup>13</sup>C NMR (75 MHz, CDCl<sub>3</sub>) δ 167.58, 134.71, 131.42, 123.94, 117.56, 38.81, 31.55 (t, *J* = 22.5 Hz), 24.15.

<sup>19</sup>F NMR (282 MHz, CDCl<sub>3</sub>) δ -80.98– -81.07 (m, 3F), -111.21– -114.98 (m, 2F), -122.97– -125.21 (m, 2F), -124.92– -126.50 (m, 2F).

**HRMS (ESI):** C<sub>16</sub>H<sub>9</sub>F<sub>9</sub>N<sub>2</sub>O<sub>2</sub>+Na<sup>+</sup> Calcd: 455.0413, Found: 455.0401.

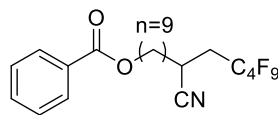

6f

**10-cyano-12,12,13,13,14,14,15,15,15-nonafluoropentadecyl benzoate (6f),** 149.5mg, yield:72%. Light yellow liquid.

<sup>1</sup>H NMR (300 MHz, CDCl<sub>3</sub>) δ 8.04 (t, *J* = 2.1 Hz, 2H), 7.53–7.59 (m, 1H), 7.34–7.50 (m, 2H), 4.31 (t, *J* = 6.6 Hz, 2H), 2.87–3.08 (m, 1H), 2.40–2.66 (m, 1H), 2.11–2.38 (m, 1H), 1.86–1.67 (m, 4H), 1.33–1.85(s, 12H).

<sup>13</sup>C NMR (75 MHz, CDCl<sub>3</sub>) δ 166.68, 132.83, 130.47, 129.51, 128.32, 119.97, 65.04, 33.42 (t, *J* = 21.0 Hz), 32.65, 29.30, 29.15, 28.81, 28.67, 26.71, 25.97, 24.06.

<sup>19</sup>F NMR (282 MHz, CDCl<sub>3</sub>) δ -81.03– -81.11 (m, 3F), -113.71– -114.00 (m, 2F), -124.42– -124.53 (m, 2F), -125.96– -126.07 (m, 2F).

**HRMS (ESI):** C<sub>23</sub>H<sub>26</sub>F<sub>9</sub>NO<sub>2</sub>+Na<sup>+</sup> Calcd: 542.1712, Found: 542.1704.

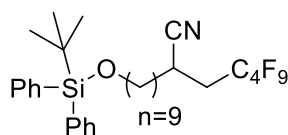

6g

**11-((tert-butyl-diphenylsilyloxy)-2-(2,2,3,3,4,4,5,5,5-nonafluoropentyl)undecanenitrile (6g),** 193.4mg, yield: 74%. Light yellow liquid.

<sup>1</sup>H NMR (300 MHz, CDCl<sub>3</sub>) δ 7.65–7.69 (m, 4H), 7.35–7.43 (m, 6H), 3.65 (t, *J* = 6.5 Hz, 2H), 2.91–3.01 (m, 1H), 2.17–2.64 (m, 2H), 1.67–1.75 (m, 2H), 1.1.27–1.61 (m, 14H), 1.05 (s, 9H).

<sup>13</sup>C NMR (75 MHz, CDCl<sub>3</sub>) δ 135.58, 134.15, 129.50, 127.58, 120.00, 63.96, 33.47 (t, *J* = 21.0 Hz), 32.70, 32.55, 29.42, 29.28, 29.21, 28.86, 26.86, 26.76, 25.73, 24.09, 19.23.

<sup>19</sup>F NMR (282 MHz, CDCl<sub>3</sub>) δ -80.94– -81.04 (m, 3F), -113.70– -113.94 (m, 2F), -124.37– -124.48 (m, 2F), -125.90– -126.01 (m, 2F).

**HRMS (ESI):** C<sub>32</sub>H<sub>40</sub>F<sub>9</sub>NOSi+Na<sup>+</sup> Calcd: 676.2628, Found: 676.2519.

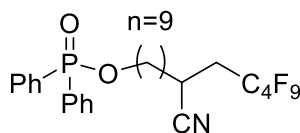

6h

**10-cyano-12, 12, 13, 13, 14, 14, 15, 15, 15-nonafluoropentadecyl diphenylphosphinate (6h),** 210.52, yield: 85%. Colourless liquid.

<sup>1</sup>H NMR (300 MHz, CDCl<sub>3</sub>) δ 7.78–7.83 (m, 4H), 7.42–7.53 (m, 6H), 4.01 (q, *J* = 6.7 Hz, 2H), 2.91–3.01 (m, 1H), 2.43–2.64 (m, 1H), 2.18–2.38 (m, 1H), 1.62–1.78 (m, 4H), 1.35–1.61 (m, 4H), 1.29–1.60 (m, 12H).

$^{13}\text{C}$  NMR (75 MHz,  $\text{CDCl}_3$ )  $\delta$  132.52, 132.11, 132.08, 131.68, 131.55, 130.70, 128.60, 128.42, 119.97, 64.95 (d,  $J = 6.1$  Hz), 33.43 (t,  $J = 21.0$  Hz), 32.65, 30.50 (d,  $J = 6.6$  Hz), 29.25, 29.13, 29.02, 28.78, 26.71, 25.54, 24.07.

$^{19}\text{F}$  NMR (282 MHz,  $\text{CDCl}_3$ )  $\delta$  -80.98– -81.06 (m, 3F), -113.70– -113.96 (m, 2F), -124.39– -124.49 (m, 2F), -125.93– 126.03 (m, 2F).

$^{31}\text{P}$  NMR (121 MHz,  $\text{CDCl}_3$ )  $\delta$  31.21.

**HRMS (ESI):**  $\text{C}_{28}\text{H}_{31}\text{F}_9\text{NO}_2\text{P}+\text{Na}^+$  Calcd: 638.1841, Found: 638.1912.

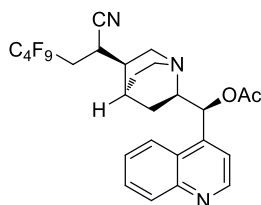

6i

**(1S)-((2R,4S,5S)-5-((S)-1-cyano-3,3,4,4,5,5,6,6,6-nonafluorohexyl)quinuclidin-2-yl)(quinolin-4-yl)methyl acetate (6i)**, 176.8mg, yield:76%, d.r. = 2:1. Light yellow liquid.

$^1\text{H}$  NMR (300 MHz,  $\text{CDCl}_3$ )  $\delta$  8.89 (d,  $J = 4.3$  Hz, 1H), 8.11 (dd,  $J = 17.0, 8.6$  Hz, 2H), 7.44–7.87 (m, 2H), 7.34 (d,  $J = 4.4$  Hz, 1H), 6.58 (t,  $J = 8.4$  Hz, 1H), 2.30–3.27 (m, 8H), 2.15 (s, 3H), 1.53–1.86 (m, 6H).

$^{13}\text{C}$  NMR (75 MHz,  $\text{CDCl}_3$ )  $\delta$  169.67, 149.97, 148.52, 144.37, 130.59, 129.45, 127.20, 125.39, 122.98, 118.96, 117.83, 73.71, 58.57, 49.70, 48.99, 48.96, 37.45, 31.88, 26.11, 26.42, 25.43, 24.42, 21.71, 21.02.

$^{19}\text{F}$  NMR (282 MHz,  $\text{CDCl}_3$ )  $\delta$  -80.89– -80.98 (m, 3F), -111.49– -114.97 (m, 2F), -124.11– -124.18 (m, 2F), -125.80– -125.88 (m, 2F).

**HRMS (ESI):**  $\text{C}_{26}\text{H}_{24}\text{F}_9\text{N}_3\text{O}_2+\text{H}^+$  Calcd: 582.1725, Found: 582.1816.

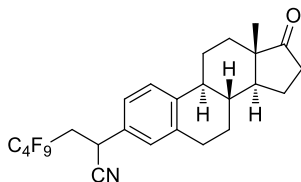

6j

**4,4,5,5,6,6,7,7,7-nonafluoro-2-((8R,9S,13S,14S)-13-methyl-17-oxo-7,8,9,11,12,13,14,15,16,17-decahydro-6H-cyclopenta[a]phenanthren-3-yl)heptanenitrile (6j)**, 187.0mg, yield: 89%, d.r. > 20:1. Colourless liquid.

$^1\text{H}$  NMR (300 MHz,  $\text{CDCl}_3$ )  $\delta$  7.35 (d,  $J = 7.9$  Hz, 1H), 7.15 (d,  $J = 8.1$  Hz, 2H), 4.13 (dd,  $J = 10.1, 4.2$  Hz, 1H), 2.94 (dd,  $J = 8.7, 3.9$  Hz, 2H), 2.67–2.88 (m, 1H), 2.37–2.67 (m, 3H), 2.30 (t,  $J = 8.4$  Hz, 1H), 1.90–2.23 (m, 4H), 1.35–1.78 (m, 6H), 0.91 (s, 3H).

$^{13}\text{C}$  NMR (75 MHz,  $\text{CDCl}_3$ )  $\delta$  140.87, 138.17, 131.23, 127.67, 126.69, 124.46, 118.93, 50.41, 47.89, 44.24, 37.91, 37.30 (t,  $J = 21.0$  Hz), 37.02, 31.50, 29.29, 26.23, 25.64, 21.55, 13.78.

$^{19}\text{F}$  NMR (282 MHz,  $\text{CDCl}_3$ )  $\delta$  -80.98– -81.07 (m, 3F), -112.72– -115.14 (m, 2F), -124.37 (t,  $J = 7.6$  Hz, 2F), -125.80– -125.98 (m, 2F).

**HRMS (ESI):**  $\text{C}_{25}\text{H}_{24}\text{F}_9\text{NO}+\text{Na}^+$  Calcd: 548.1612, Found: 548.1615.

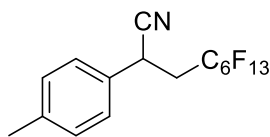

8a

**4,4,5,5,6,6,7,7,8,8,9,9,9-tridecafluoro-2-(p-tolyl)nonanenitrile (8a)**, 163.0mg, yield: 88%. Colourless liquid.

<sup>1</sup>H NMR (300 MHz, CDCl<sub>3</sub>) δ 7.21–7.29 (m, 4H), 4.15 (dd, *J* = 9.8, 4.5 Hz, 1H), 2.72–2.93 (m, 1H), 2.46–2.61 (m, 1H), 2.37 (s, 3H).

<sup>13</sup>C NMR (75 MHz, CDCl<sub>3</sub>) δ 139.08, 130.83, 130.26, 127.05, 118.93, 37.15 (t, *J* = 20.3 Hz), 29.38, 21.03.

<sup>19</sup>F NMR (282 MHz, CDCl<sub>3</sub>) δ -80.83– -80.91 (m, 3F), -113.47– -113.87 (m, 2F), -121.77– -121.86 (m, 2F), -122.84– -122.93 (m, 2F), -123.42– -123.55 (m, 2F), -126.14– -126.27 (m, 2F).

**HRMS (ESI):** C<sub>16</sub>H<sub>10</sub>F<sub>13</sub>N+Na<sup>+</sup> Calcd: 486.0498, Found: 486.0512.

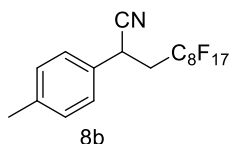

**4,4,5,5,6,6,7,7,8,8,9,9,10,10,11,11,11-heptadecafluoro-2-(*p*-tolyl)undecanenitrile (8b)**, 193.7mg, yield: 86%. White solid, mp 65–66°C.

<sup>1</sup>H NMR (300 MHz, CDCl<sub>3</sub>) δ 7.21–7.29 (m, 4H), 4.16 (dd, *J* = 9.8, 4.5 Hz, 1H), 2.72–2.93 (m, 1H), 2.42–2.61 (m, 1H), 2.37 (s, 3H).

<sup>13</sup>C NMR (75 MHz, CDCl<sub>3</sub>) δ 139.08, 130.82, 130.26, 127.06, 118.95, 37.16, 29.38, 21.06.

<sup>19</sup>F NMR (282 MHz, CDCl<sub>3</sub>) δ -80.82 (dd, *J* = 9.9 Hz, 3F), -113.48– -113.87 (m, 2F), -121.58– -123.48 (m, 10F), -126.12– -126.27 (m, 2F).

**HRMS (ESI):** C<sub>18</sub>H<sub>10</sub>F<sub>17</sub>N+Na<sup>+</sup> Calcd: 586.0439, Found: 586.0433.

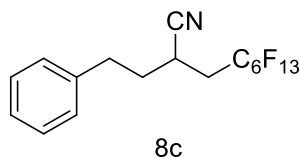

**4,4,5,5,6,6,7,7,8,8,9,9,9-tridecafluoro-2-phenethylnonanenitrile (8c)**, 158.4mg, yield: 83%. White solid, mp 47–48°C.

<sup>1</sup>H NMR (300 MHz, CDCl<sub>3</sub>) δ 7.30–7.35 (m, 5H), 2.85–3.01 (m, 2H), 2.76–2.84 (m, 1H), 2.44–2.65 (m, 1H), 2.18–2.38 (m, 1H), 1.94–2.15 (m, 2H).

<sup>13</sup>C NMR (75 MHz, CDCl<sub>3</sub>) δ 139.04, 128.83, 128.36, 126.78, 119.63, 34.27, 33.49 (t, *J* = 22.5 Hz), 32.82, 23.55.

<sup>19</sup>F NMR (282 MHz, CDCl<sub>3</sub>) δ -80.85– -80.94 (m, 3F), -113.34– -113.58 (m, 2F), -121.81– -121.89 (m, 2F), -122.81– -122.94 (m, 2F), -123.47– -123.63 (m, 2F), -126.15– -126.29 (m, 2F).

**HRMS (ESI):** C<sub>18</sub>H<sub>14</sub>F<sub>13</sub>N+Na<sup>+</sup> Calcd: 500.0654, Found: 500.0667.

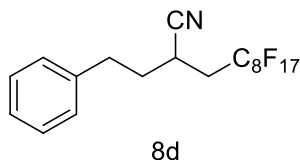

**4,4,5,5,6,6,7,7,8,8,9,9,10,10,11,11,11-heptadecafluoro-2-phenethylundecanenitrile (8d)**, 196.2mg, yield: 85%. White solid, mp 75–76°C.

<sup>1</sup>H NMR (300 MHz, CDCl<sub>3</sub>) δ 7.20–7.36 (m, 5H), 2.87–3.13 (m, 2H), 2.71–2.89 (m, 1H), 2.44–2.69 (m, 1H), 2.19–2.33 (m, 1H), 1.94–2.14 (m, 2H).

<sup>13</sup>C NMR (75 MHz, CDCl<sub>3</sub>) δ 139.02, 128.84, 128.36, 126.79, 119.64, 34.28, 33.50, 32.82, 23.55

<sup>19</sup>F NMR (282 MHz, CDCl<sub>3</sub>) δ -80.82 (t, *J* = 9.9 Hz, 3F), -113.34– -113.56 (m, 2F), -121.61– -123.48 (m, 10F), -126.12– -126.24 (m, 2F).

**HRMS (ESI):** C<sub>20</sub>H<sub>14</sub>F<sub>17</sub>N+Na<sup>+</sup> Calcd: 600.0590, Found: 600.0627.

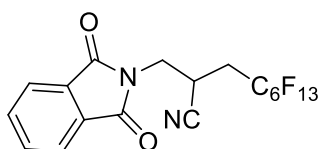

8e

**2-((1,3-dioxisoindolin-2-yl)methyl)-4,4,5,5,6,6,7,7,8,8,9,9,9-tridecafluorononanenitrile (8e)**, 168.1mg, yield:79%. White solid, mp 127-128°C.

<sup>1</sup>H NMR (300 MHz, CDCl<sub>3</sub>) δ 7.91 (dd, *J* = 5.2, 3.1 Hz, 2H), 7.79 (dd, *J* = 5.3, 3.0 Hz, 2H), 4.13 (dd, *J* = 13.8, 7.9 Hz, 1H), 3.95 (dd, *J* = 13.8, 6.8 Hz, 1H), 3.49–3.65 (m, 1H), 2.38–2.77 (m, 2H).

<sup>13</sup>C NMR (75 MHz, CDCl<sub>3</sub>) δ 167.57, 134.71, 131.42, 123.95, 117.53, 38.82, 31.82(*t*, *J* = 20.6 Hz), 24.17.

<sup>19</sup>F NMR (282 MHz, CDCl<sub>3</sub>) δ -80.81 (*t*, *J* = 9.8 Hz, 3F), -112.00– -114.30 (*m*, 2F), -121.81 (*s*, 2F), -122.88 (*s*, 2F), -123.26 (*t*, *J* = 12.9 Hz, 2F), -126.17 (*td*, *J* = 15.1, 6.8 Hz, 2F).

**HRMS (ESI):** C<sub>18</sub>H<sub>9</sub>F<sub>13</sub>N<sub>2</sub>O<sub>2</sub>+Na<sup>+</sup> Calcd: 555.0354, Found: 555.0360.

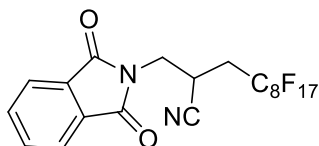

8f

**2-((1,3-dioxisoindolin-2-yl)methyl)-4,4,5,5,6,6,7,7,8,8,9,9,10,10,11,11,11-heptadecafluoro undecanenitrile (8f)**, 207.3mg, yield: 82%. White solid, mp 150-151°C.

<sup>1</sup>H NMR (300 MHz, CDCl<sub>3</sub>) δ 7.90–7.94 (*m*, 2H), 7.78–7.81 (*m*, 2H), 4.13 (dd, *J* = 13.8, 7.8Hz, 1H), 3.95 (dd, *J* = 13.8, 6.9 Hz, 1H), 3.68–3.47 (*m*, 1H), 2.81–2.30 (*m*, 2H).

<sup>13</sup>C NMR (75 MHz, CDCl<sub>3</sub>) δ 167.56, 134.71, 131.42, 123.97, 117.51, 38.82, 31.70, 24.16

<sup>19</sup>F NMR (282 MHz, CDCl<sub>3</sub>) δ -80.78 (*t*, *J* = 9.9 Hz, 3F), -112.94– -113.31 (*m*, 2F), -121.56– -123.23 (*m*, 10F), -126.08– -126.20 (*m*, 2F).

**HRMS (ESI):** C<sub>20</sub>H<sub>9</sub>F<sub>17</sub>N<sub>2</sub>O<sub>2</sub>+Na<sup>+</sup> Calcd: 655.0285, Found: 655.0325.

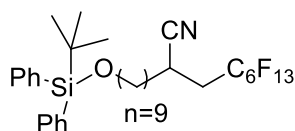

8g

**11-((tert-butyl diphenylsilyl)oxy)-2-(2,2,3,3,4,4,5,5,6,6,7,7,7-tridecafluoroheptyl)undecane nitrile (8g)**, 253.1mg, yield: 84%. Colourless liquid.

<sup>1</sup>H NMR (300 MHz, CDCl<sub>3</sub>) δ 7.66–7.68 (*m*, 4H), 7.34–7.44 (*m*, 6H), 3.66 (*t*, *J* = 6.5 Hz, 2H), 2.90–3.00 (*m*, 1H), 2.43–2.64 (*m*, 1H), 2.17–2.37 (*m*, 1H), 1.73 (ddd, *J* = 11.7, 8.9, 5.8 Hz, 2H), 1.67–1.49 (*m*, 3H), 1.50–1.17 (*m*, 11H), 1.07 (*s*, 9H).

<sup>13</sup>C NMR (75 MHz, CDCl<sub>3</sub>) δ 135.58, 134.17, 129.49, 127.57, 119.97, 63.96, 33.58 (*t*, *J* = 21.8 Hz), 32.71, 32.55, 29.41, 29.27, 29.20, 28.85, 26.85, 26.75, 25.73, 24.12, 19.22.

<sup>19</sup>F NMR (282 MHz, CDCl<sub>3</sub>) δ -80.79– -80.88 (*m*, 3F), -113.44– -113.70 (*m*, 2F), -121.78– -121.87 (*m*, 2F), -122.81– 122.90 (*m*, 2F), -123.42– 123.55 (*m*, 2F), -125.18– -127.41 (*m*, 2F).

**HRMS (ESI):** C<sub>34</sub>H<sub>40</sub>F<sub>13</sub>NOSi+Na<sup>+</sup> Calcd: 776.2569, Found: 776.2560.

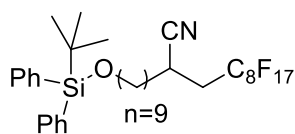

8h

**2-(9-((tert-butyl-diphenylsilyloxy)nonyl)-4,4,5,5,6,6,7,7,8,8,9,10,10,11,11,11-hexadecafluoro-9-methylundecanenitrile (8h)**, 293.5mg, yield: 86%. Colourless liquid.

$^1\text{H NMR}$  (300 MHz,  $\text{CDCl}_3$ )  $\delta$  7.65–7.68 (m, 4H), 7.34–7.45 (m, 6H), 3.67 (t,  $J = 6.5$  Hz, 2H), 2.90–3.00 (m, 1H), 2.43–2.64 (m, 1H), 2.17–2.37 (m, 1H), 1.62–1.75 (m, 2H), 1.54–1.61 (m, 4H), 1.33 (br, 11H), 1.05 (s, 9H).

$^{13}\text{C NMR}$  (75 MHz,  $\text{CDCl}_3$ )  $\delta$  135.57, 134.18, 129.48, 127.56, 119.95, 63.96, 33.60 (t,  $J = 21.8$  Hz), 32.72, 32.54, 29.40, 29.26, 29.19, 28.85, 26.85, 26.75, 25.72, 24.12, 19.22.

$^{19}\text{F NMR}$  (282 MHz,  $\text{CDCl}_3$ )  $\delta$  -80.82 (t,  $J = 9.9$  Hz, 3F), -113.42– -113.65 (m, 2F), -121.59– -122.75 (m, 10F), -123.43 (s, 2F), -126.09– -126.21 (m, 2F).

**HRMS (ESI):**  $\text{C}_{36}\text{H}_{40}\text{F}_{17}\text{NOSi}+\text{Na}^+$  Calcd: 876.2520, Found: 876.2526.

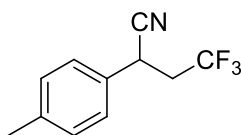

8i

**4,4,4-trifluoro-2-(*p*-tolyl)butanenitrile (8i)**, 64.7mg, yield: 76%, Colourless liquid.

$^1\text{H NMR}$  (300 MHz,  $\text{CDCl}_3$ )  $\delta$  7.23 (q,  $J = 8.4$  Hz, 4H), 4.05 (dd,  $J = 4.5, 9.8$  Hz, 1H), 2.69–2.88 (m, 1H), 2.34–2.64 (m, 1H), 2.35 (s, 3H).

$^{13}\text{C NMR}$  (75 MHz,  $\text{CDCl}_3$ )  $\delta$  139.01, 130.50, 130.19, 127.06, 124.74 (q,  $J = 276.0$  Hz), 118.82, 39.66 (q,  $J = 27.0$  Hz), 30.85 (q,  $J = 3.75$  Hz), 21.02.

$^{19}\text{F NMR}$  (282 MHz,  $\text{CDCl}_3$ )  $\delta$  -60.08.

**HRMS (ESI):**  $\text{C}_{11}\text{H}_{10}\text{F}_3\text{N}+\text{Na}^+$  Calcd: 236.0658, Found: 236.0660.

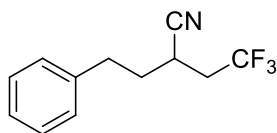

8j

**4,4,5,5,6,6,7,7,8,8,9,9,9-tridecafluoro-2-phenethylnonanenitrile (8j)**, 158.4mg, yield: 83%. White solid, mp 47–48°C.

$^1\text{H NMR}$  (300 MHz,  $\text{CDCl}_3$ )  $\delta$  7.18–7.35 (m, 5H), 2.73–2.99 (m, 3H), 2.24–2.63 (m, 2H), 1.93–2.11 (m, 2H).

$^{13}\text{C NMR}$  (75 MHz,  $\text{CDCl}_3$ )  $\delta$  139.10, 130.56, 128.84, 126.88, 124.99 (q,  $J = 276.8$  Hz), 119.45, 36.38 (q,  $J = 29.3$  Hz), 33.68, 32.79, 24.94 (d,  $J = 3.0$  Hz).

$^{19}\text{F NMR}$  (282 MHz,  $\text{CDCl}_3$ )  $\delta$  -64.75.

**HRMS (ESI):**  $\text{C}_{12}\text{H}_{12}\text{F}_3\text{N}+\text{Na}^+$  Calcd: 250.0820, Found: 250.0823.

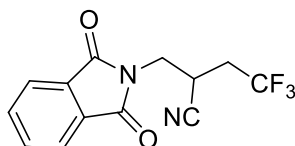

8k

**2-((1,3-dioxisoindolin-2-yl)methyl)-4,4,4-trifluorobutanenitrile (8k)**, 78.3mg, yield: 73%. Colourless liquid.

$^1\text{H NMR}$  (300 MHz,  $\text{CDCl}_3$ )  $\delta$  7.89–7.93 (m, 2H), 7.77–7.81 (m, 2H), 4.11 (dd,  $J = 13.8, 6.0$  Hz, 1H), 3.93 (dd,  $J = 13.8, 6.9$  Hz, 1H), 3.43–3.53 (m, 1H), 2.40–2.74 (m, 2H).



$^{13}\text{C}$  NMR (75 MHz,  $\text{CDCl}_3$ )  $\delta$  167.57, 134.71, 131.42, 124.78 (q,  $J = 274.5$  Hz), 123.92, 117.33, 38.45, 34.47 (q,  $J = 30.0$  Hz), 25.46 (d,  $J = 2.3$  Hz).

$^{19}\text{F}$  NMR (282 MHz,  $\text{CDCl}_3$ )  $\delta$  -64.80.

HRMS (ESI):  $\text{C}_{13}\text{H}_9\text{F}_3\text{N}_2\text{O}_2 + \text{Na}^+$  Calcd: 305.0514, Found: 305.0511.

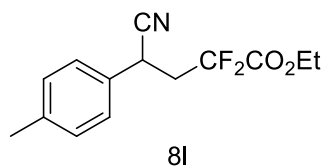

ethyl 4-cyano-2,2-difluoro-4-(*p*-tolyl)butanoate (**81**), 61.0mg, yield: 57%.

Colourless liquid.

$^1\text{H}$  NMR (300 MHz,  $\text{CDCl}_3$ )  $\delta$  7.19–7.26 (m, 4H), 4.27 (qd,  $J = 7.1, 1.3$  Hz, 2H), 4.08 (dd,  $J = 9.4, 5.1$  Hz, 1H), 2.75–2.92 (m, 1H), 2.48–2.66 (m, 1H), 2.36 (s, 3H), 1.34 (t,  $J = 7.2$  Hz, 3H).

$^{13}\text{C}$  NMR (75 MHz,  $\text{CDCl}_3$ )  $\delta$  162.89 (t,  $J = 31.5$  Hz), 138.78, 131.08, 130.06, 127.22, 119.34, 113.86 (t,  $J = 251.3$  Hz), 63.50, 40.22 (t,  $J = 23.3$  Hz), 30.33 (t,  $J = 4.5$  Hz), 21.09, 13.82.

$^{19}\text{F}$  NMR (282 MHz,  $\text{CDCl}_3$ )  $\delta$  -105.28 (d,  $J = 2.3$  Hz).

HRMS (ESI):  $\text{C}_{14}\text{H}_{15}\text{F}_2\text{NO}_2 + \text{Na}^+$  Calcd: 290.0963, Found: 290.0970.

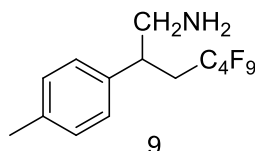

4,4,5,5,6,6,7,7,7-nonafluoro-2-(*p*-tolyl)heptan-1-amine (**9**), 116.0mg, yield: 79%

Colourless liquid.

$^1\text{H}$  NMR (300 MHz,  $\text{CDCl}_3$ )  $\delta$  7.16 (d,  $J = 8.1$  Hz, 2H), 7.10 (d,  $J = 8.1$  Hz, 2H), 2.88–3.10 (m, 3H), 2.38–2.53 (m, 2H), 2.34 (s, 3H), 1.64 (s, 2H).

$^{13}\text{C}$  NMR (75 MHz,  $\text{CDCl}_3$ )  $\delta$  138.45, 136.83, 129.57, 127.45, 47.72, 41.24, 34.24 (t,  $J = 21.8$  Hz), 21.00.

$^{19}\text{F}$  NMR (282 MHz,  $\text{CDCl}_3$ )  $\delta$  -80.06– -81.15 (m, 3F), -112.81– -112.92 (m, 2F), -124.41– -124.52 (m, 2F), -125.91– -126.03 (m, 2F).

HRMS (ESI):  $\text{C}_{14}\text{H}_{14}\text{F}_9\text{N} + \text{H}^+$  Calcd: 368.1055, Found: 368.1061.

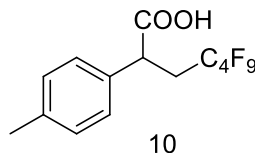

5,5,6,6,7,7,8,8,8-nonafluoro-3-(*p*-tolyl)octanoic acid (**10**), 129.9mg, yield: 85%.

White solid, mp 77–78°C.

$^1\text{H}$  NMR (300 MHz,  $\text{CDCl}_3$ )  $\delta$  11.08 (br, 1H), 7.14–7.25 (m, 4H), 3.98 (dd,  $J = 9.7, 4.6$  Hz, 1H), 3.02–3.23 (m, 1H), 2.35–2.50 (m, 1H), 2.33 (s, 3H).

$^{13}\text{C}$  NMR (75 MHz,  $\text{CDCl}_3$ )  $\delta$  178.36, 138.29, 133.54, 129.87, 127.52, 43.26, 33.84 (t,  $J = 21.8$  Hz), 21.05.

$^{19}\text{F}$  NMR (282 MHz,  $\text{CDCl}_3$ )  $\delta$  -80.07– -81.15 (m, 3F), -112.62– -115.35 (m, 2F), -124.56– -124.61 (m, 2F), -125.91– -126.08 (m, 2F).

HRMS (ESI):  $\text{C}_{15}\text{H}_{13}\text{F}_9\text{O}_2 + \text{Na}^+$  Calcd: 405.0508, Found: 405.0484.

## 8. X-ray structure of 6e

|                                                                                   |                                                                                    |
|-----------------------------------------------------------------------------------|------------------------------------------------------------------------------------|
| 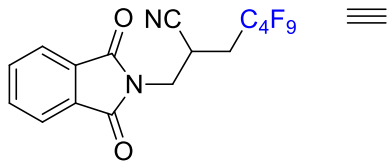 |  |
| Identification code                                                               | guoqp_0508                                                                         |
| Empirical formula                                                                 | C <sub>16</sub> H <sub>9</sub> F <sub>9</sub> N <sub>2</sub> O <sub>2</sub>        |
| Formula weight                                                                    | 432.25                                                                             |
| Temperature/K                                                                     | 291.08 (10)                                                                        |
| Crystal system                                                                    | triclinic                                                                          |
| Space group                                                                       | P-1                                                                                |
| a/Å                                                                               | 5.7476 (7)                                                                         |
| b/Å                                                                               | 11.2870 (13)                                                                       |
| c/Å                                                                               | 14.0380 (17)                                                                       |
| α / °                                                                             | 76.581 (10)                                                                        |
| β / °                                                                             | 85.498 (10)                                                                        |
| γ / °                                                                             | 83.205 (10)                                                                        |
| Volume/Å <sup>3</sup>                                                             | 878.38 (18)                                                                        |
| Z                                                                                 | 2                                                                                  |
| ρ <sub>calc</sub> /cm <sup>3</sup>                                                | 1.634                                                                              |
| μ /mm <sup>-1</sup>                                                               | 0.172                                                                              |
| F(000)                                                                            | 432.0                                                                              |
| Crystal size/mm <sup>3</sup>                                                      | 0.21 × 0.15 × 0.14                                                                 |
| Radiation                                                                         | MoKα (λ = 0.71073)                                                                 |
| 2θ range for data collection/°                                                    | 7.14 to 52.04                                                                      |
| Index ranges                                                                      | -7 ≤ h ≤ 7, -13 ≤ k ≤ 12, -17 ≤ l ≤ 17                                             |
| Reflections collected                                                             | 5554                                                                               |
| Independent reflections                                                           | 3444 [R <sub>int</sub> = 0.0292, R <sub>sigma</sub> = 0.0636]                      |
| Data/restraints/parameters                                                        | 3444/42/280                                                                        |
| Goodness-of-fit on F <sup>2</sup>                                                 | 1.029                                                                              |
| Final R indexes [I > 2σ (I)]                                                      | R <sub>1</sub> = 0.0905, wR <sub>2</sub> = 0.2296                                  |
| Final R indexes [all data]                                                        | R <sub>1</sub> = 0.1501, wR <sub>2</sub> = 0.2871                                  |
| Largest diff. peak/hole / e Å <sup>-3</sup>                                       | 0.53/-0.37                                                                         |

## 9. NMR spectra of new compounds

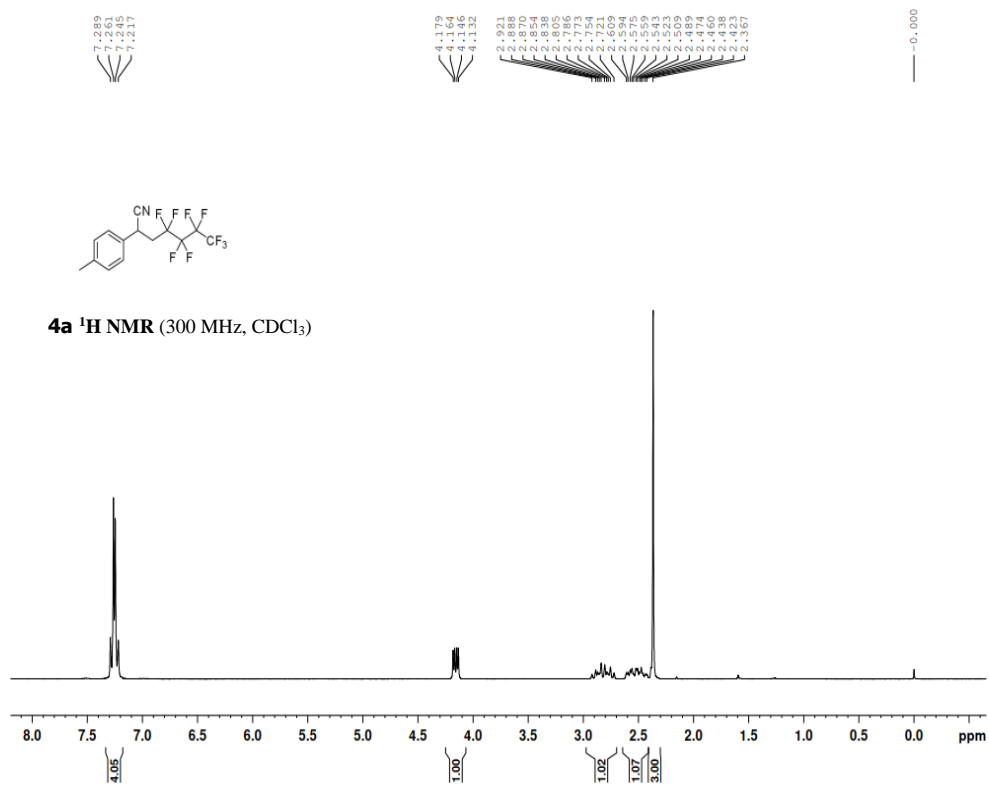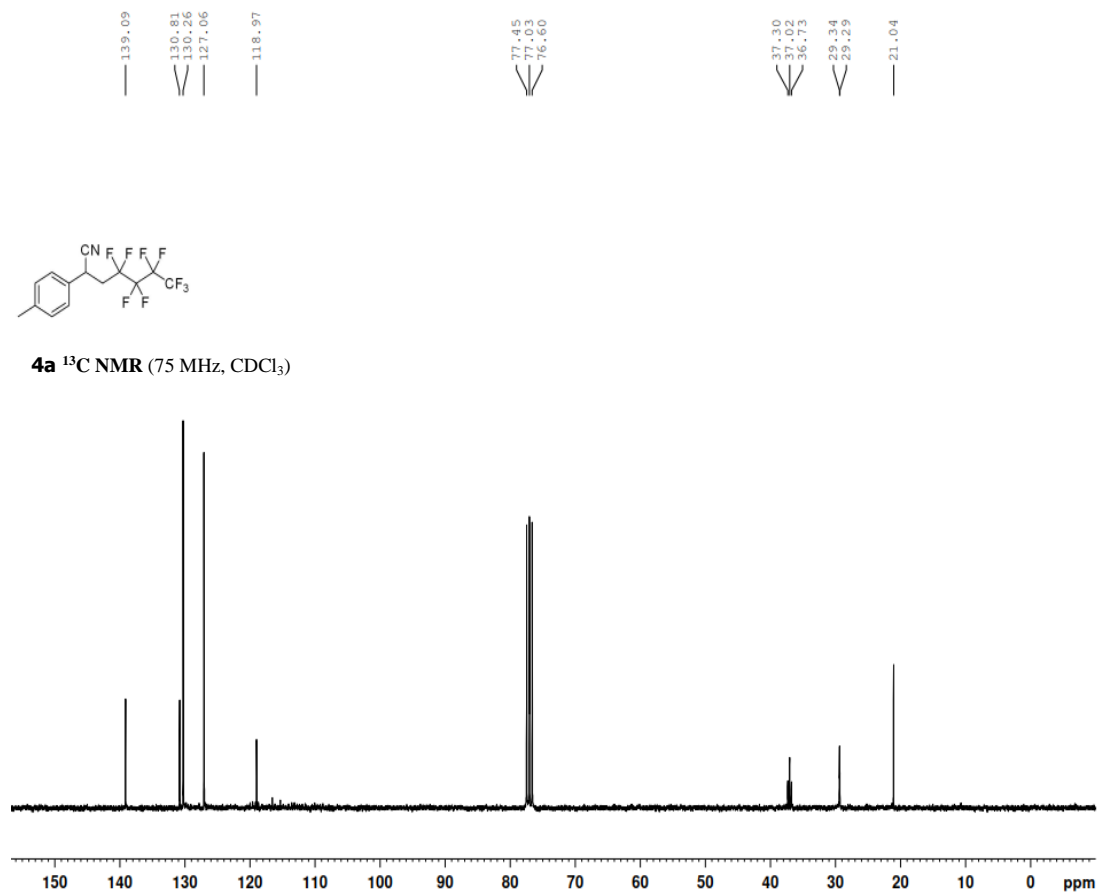

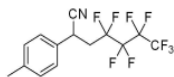

**4a**  $^{19}\text{F}$  NMR (282 MHz,  $\text{CDCl}_3$ )

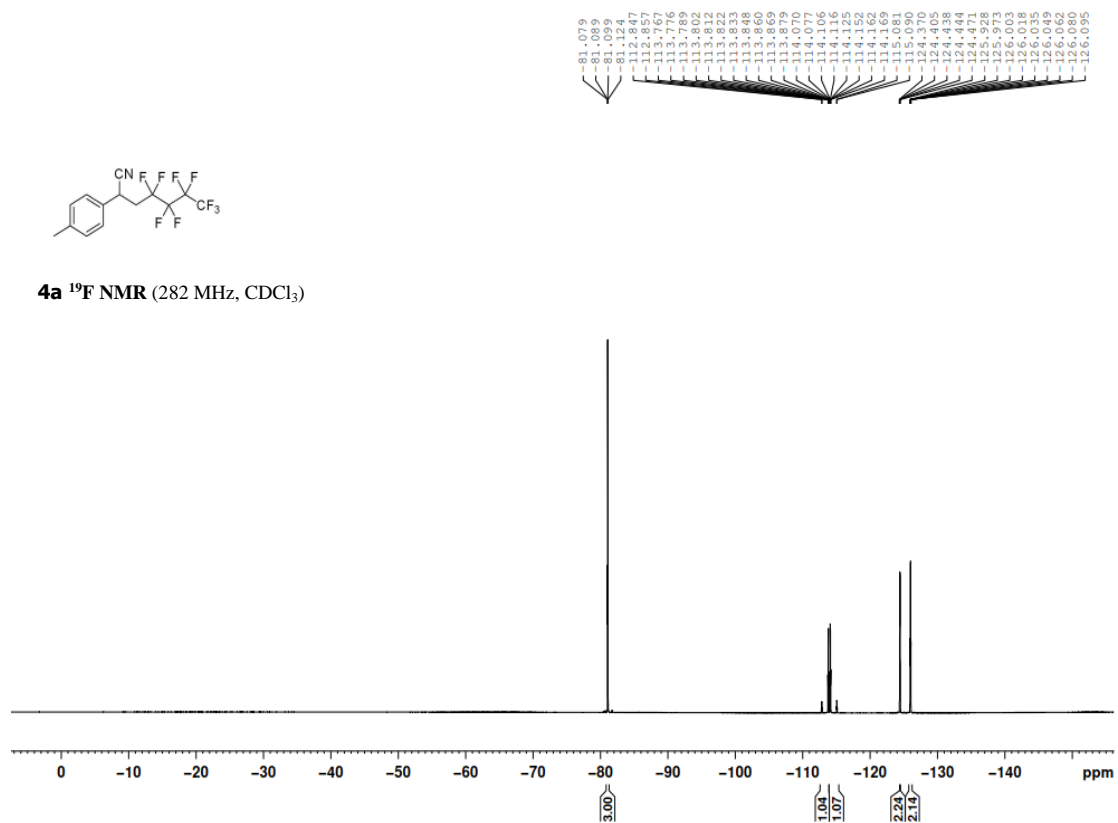

7.445  
7.427  
7.416  
7.408  
7.385  
7.261

4.220  
4.205  
4.187  
4.173

2.950  
2.916  
2.829  
2.829  
2.834  
2.816  
2.802  
2.783  
2.730  
2.630  
2.623  
2.602  
2.587  
2.572  
2.534  
2.534  
2.518  
2.503  
2.489  
2.466  
2.434  
2.334  
1.568

-0.000

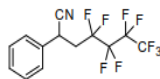

**4b**  $^1\text{H}$  NMR (300 MHz,  $\text{CDCl}_3$ )

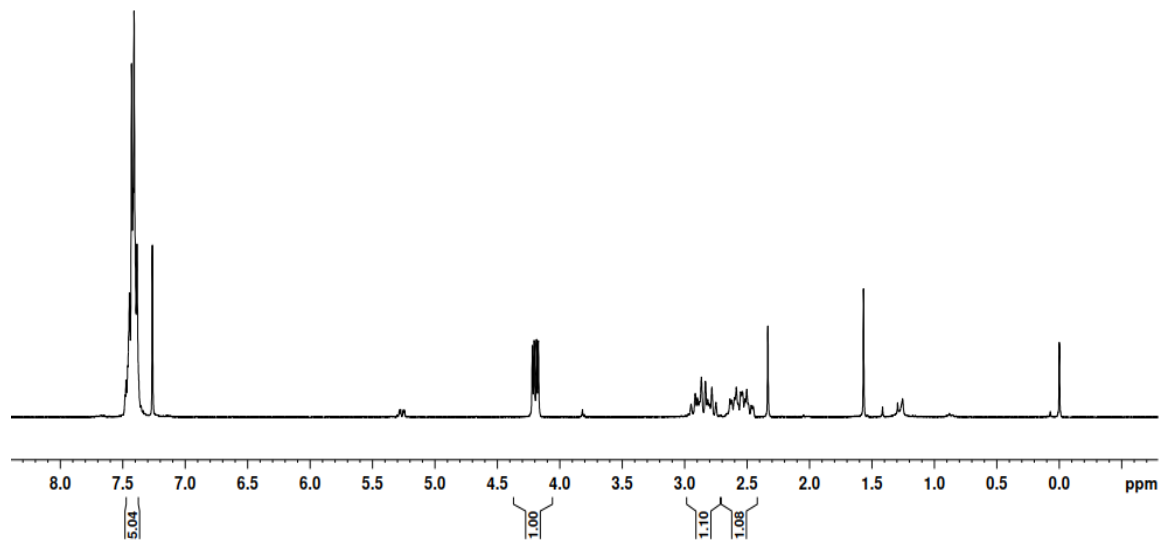

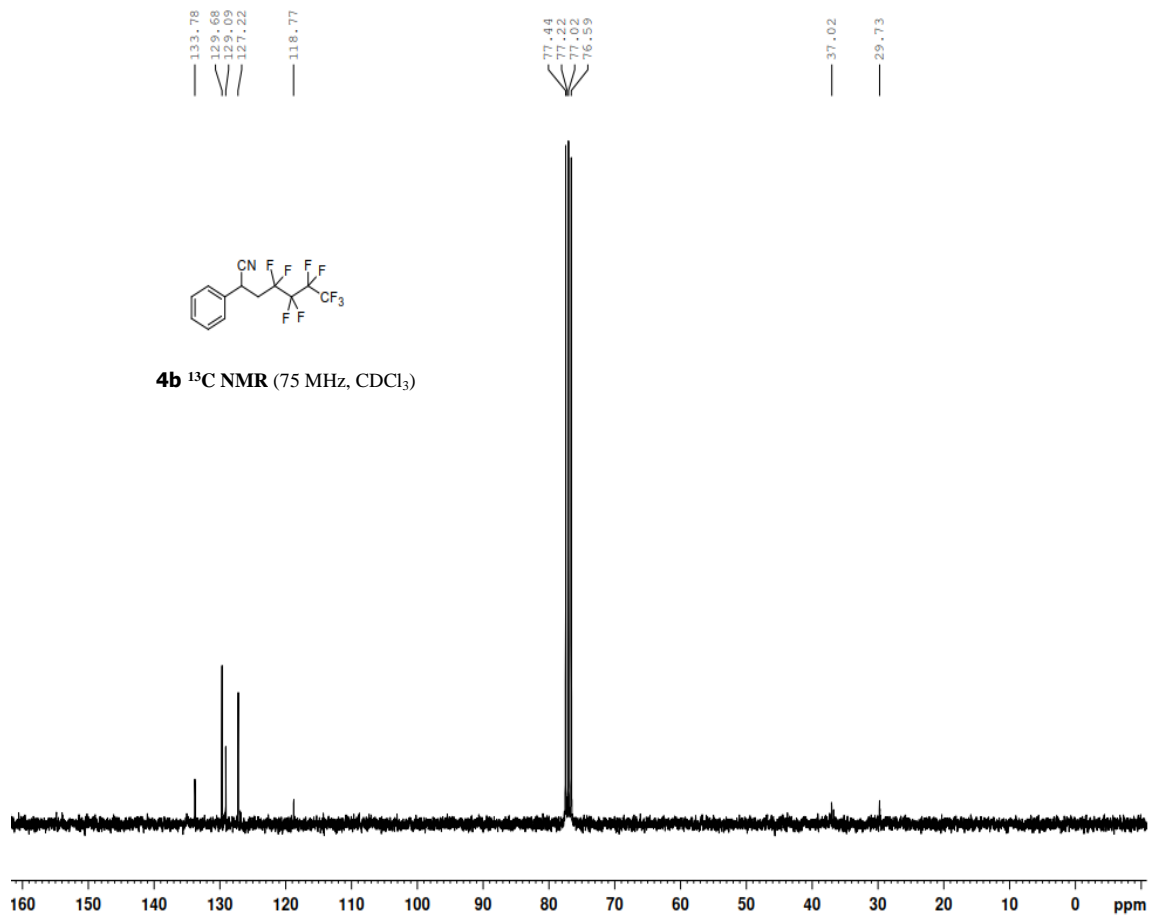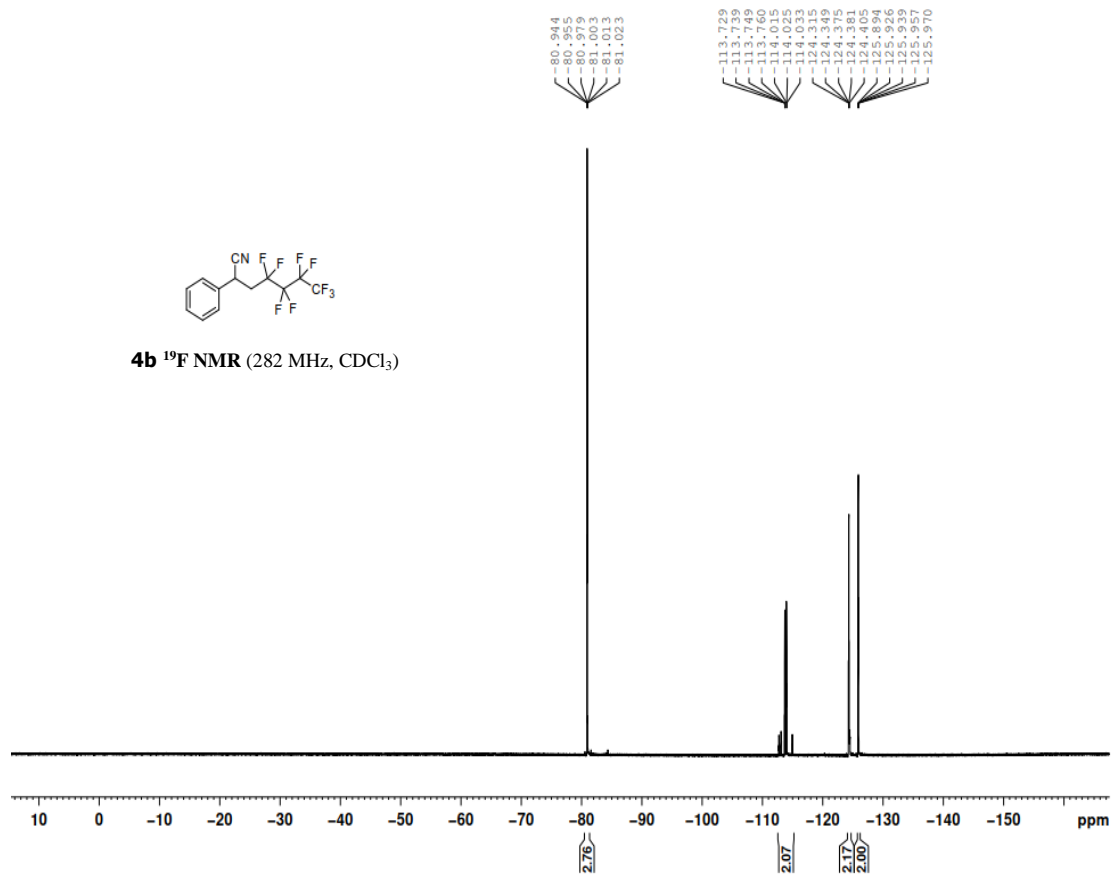

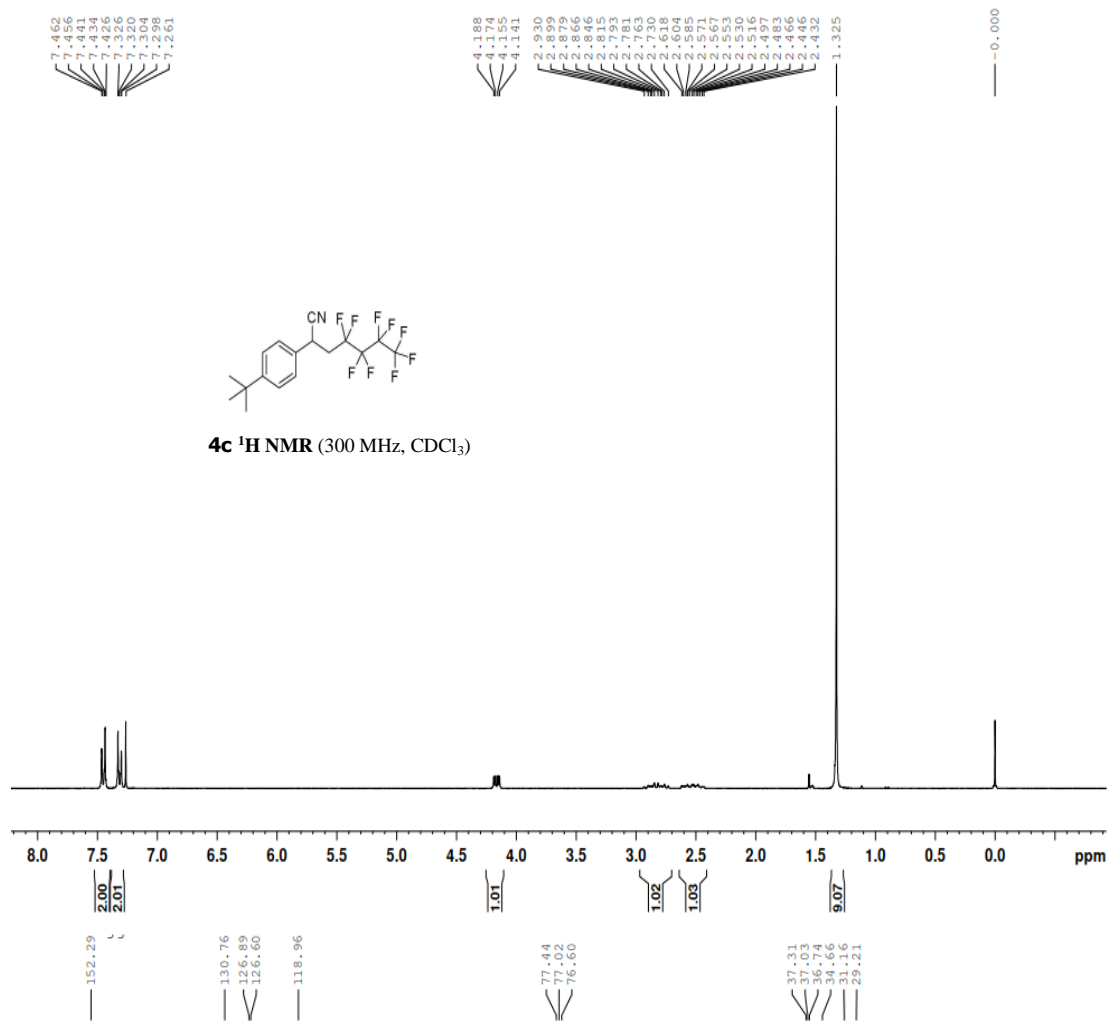

**4c** <sup>13</sup>C NMR (75 MHz, CDCl<sub>3</sub>)

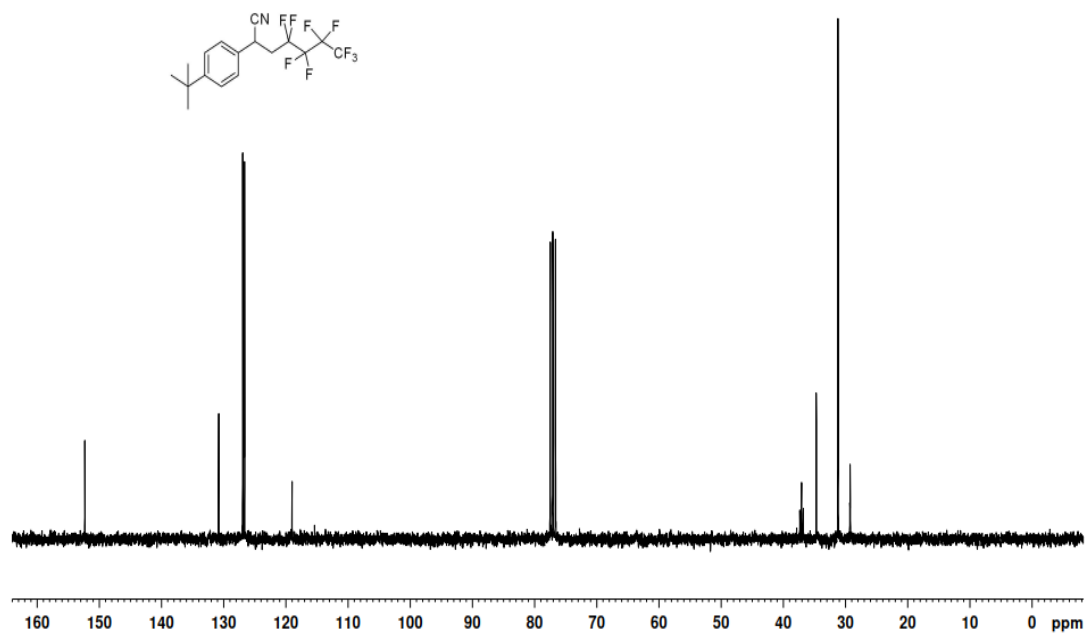

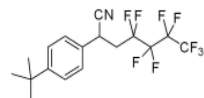

**4c** <sup>19</sup>F NMR (282 MHz, CDCl<sub>3</sub>)

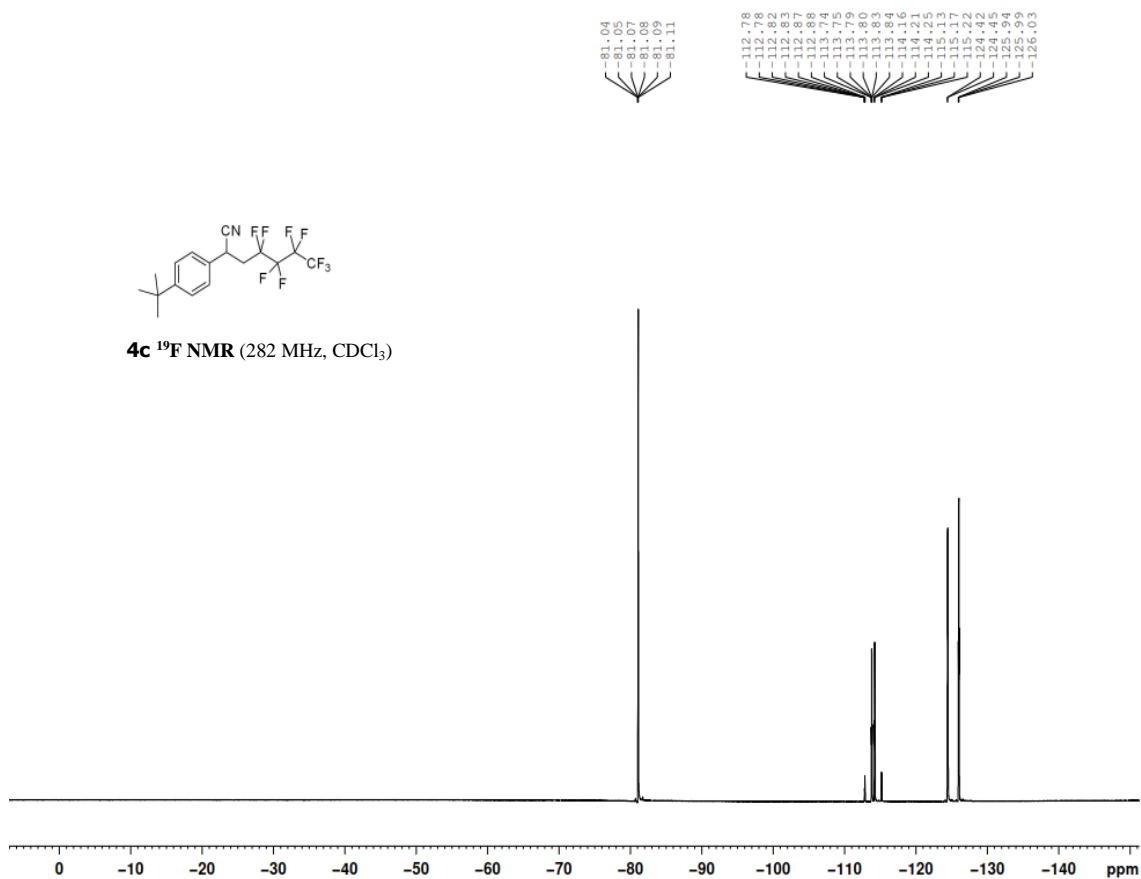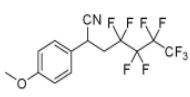

**4d** <sup>1</sup>H NMR (300 MHz, CDCl<sub>3</sub>)

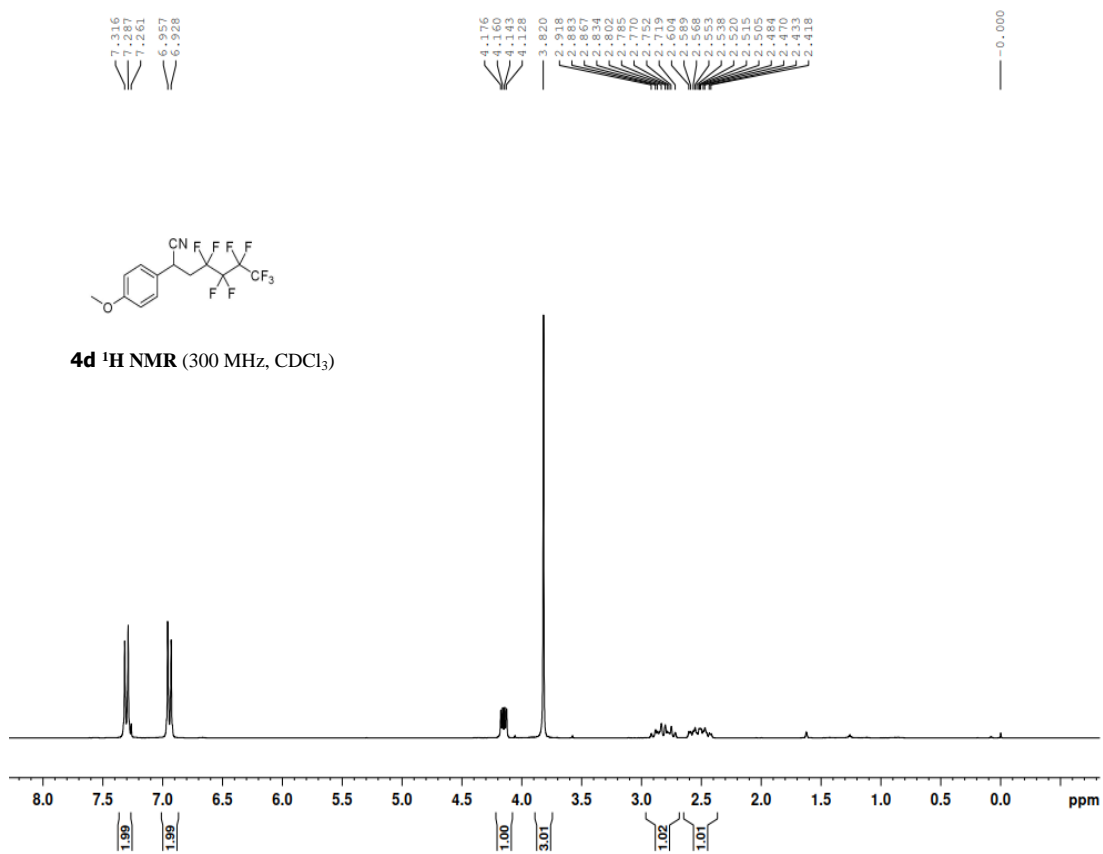

159.99  
128.42  
125.62  
119.07  
114.93

77.45  
77.00  
76.60  
55.36  
37.32  
36.75  
28.98

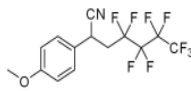

**4d** <sup>13</sup>C NMR (75 MHz, CDCl<sub>3</sub>)

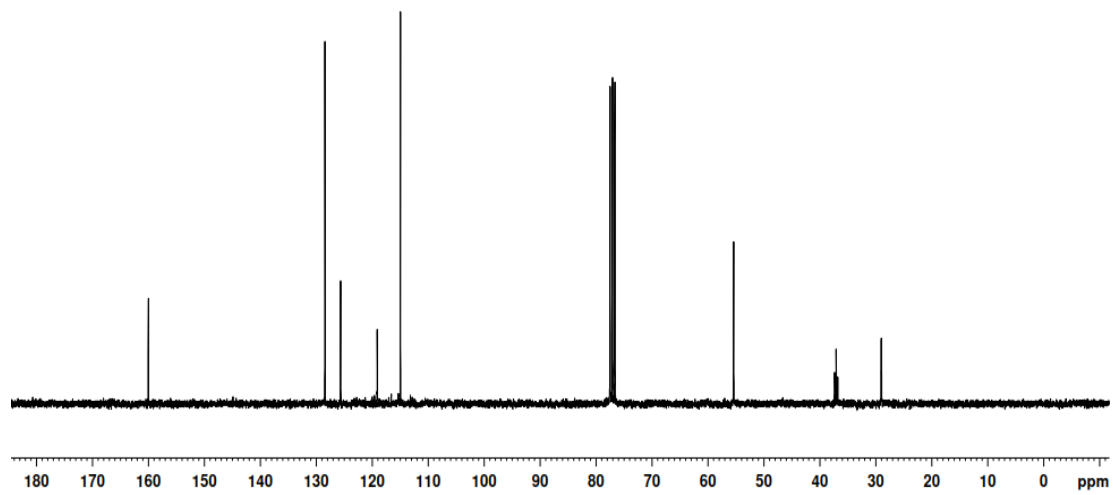

81.045  
81.055  
81.078  
81.088  
81.112  
81.117  
81.123  
112.886  
112.895  
112.807  
113.852  
114.067  
114.113  
114.159  
115.074  
115.124  
115.124  
124.410  
124.436  
124.436  
124.453  
124.453  
124.468  
124.474  
126.009  
126.052  
126.083

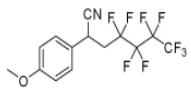

**4d** <sup>19</sup>F NMR (282 MHz, CDCl<sub>3</sub>)

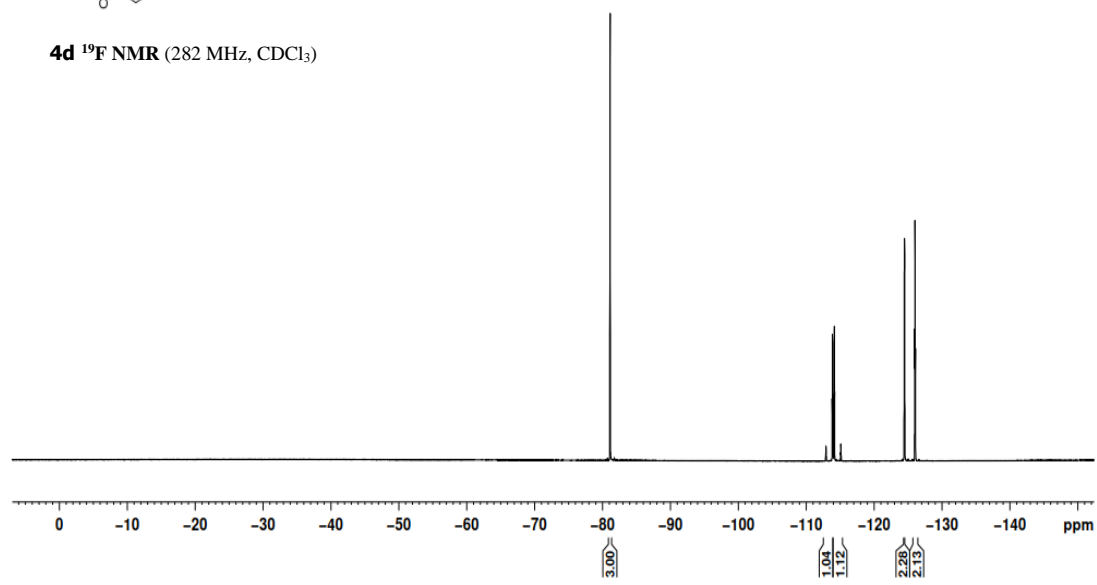



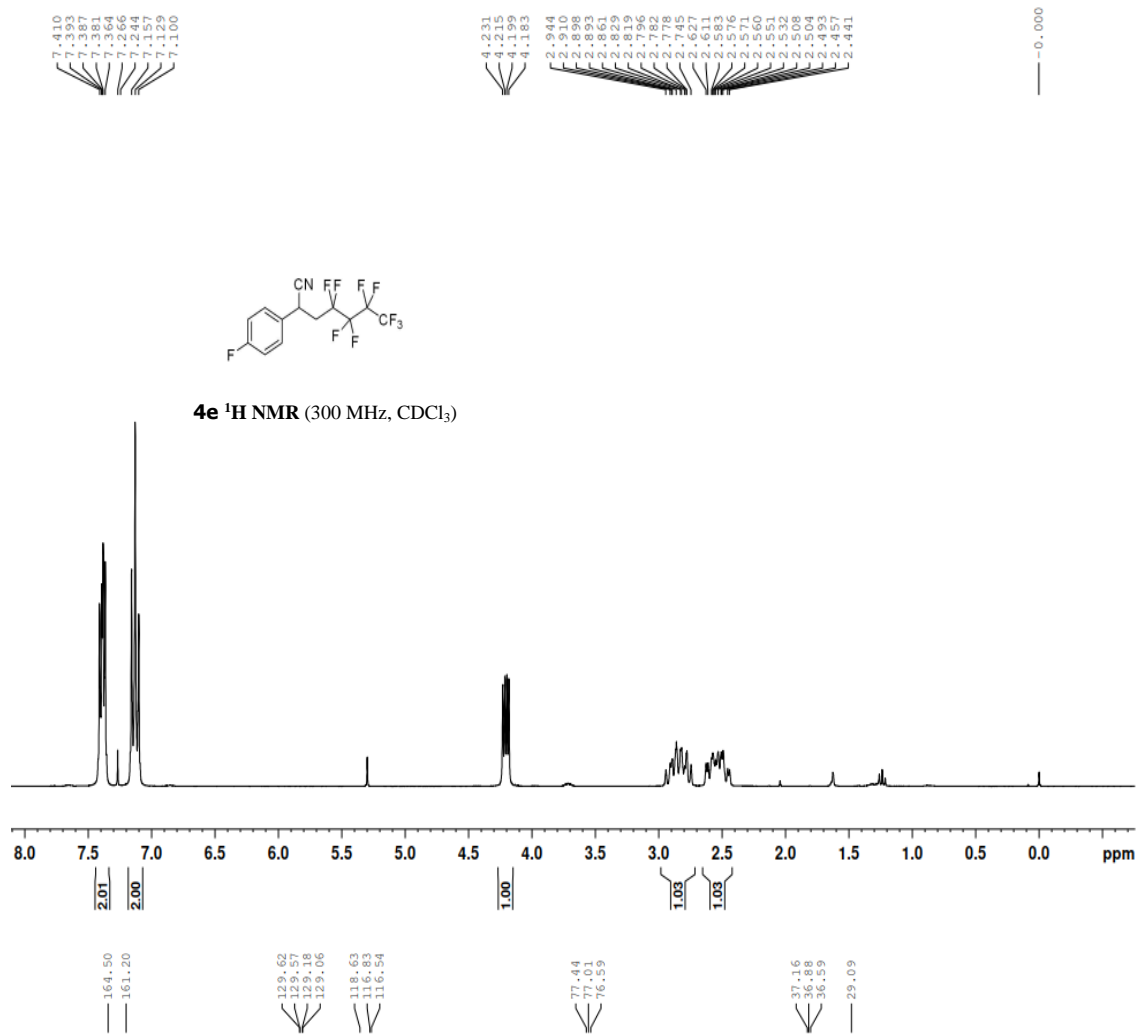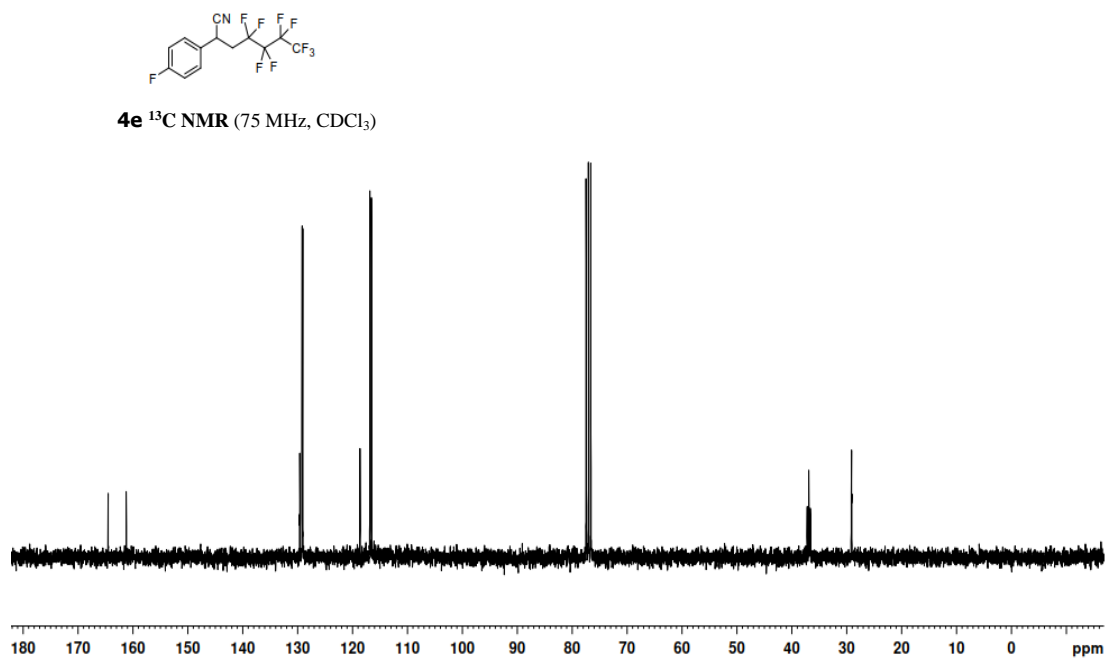

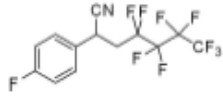

**4e**  $^{19}\text{F}$  NMR (282 MHz,  $\text{CDCl}_3$ )

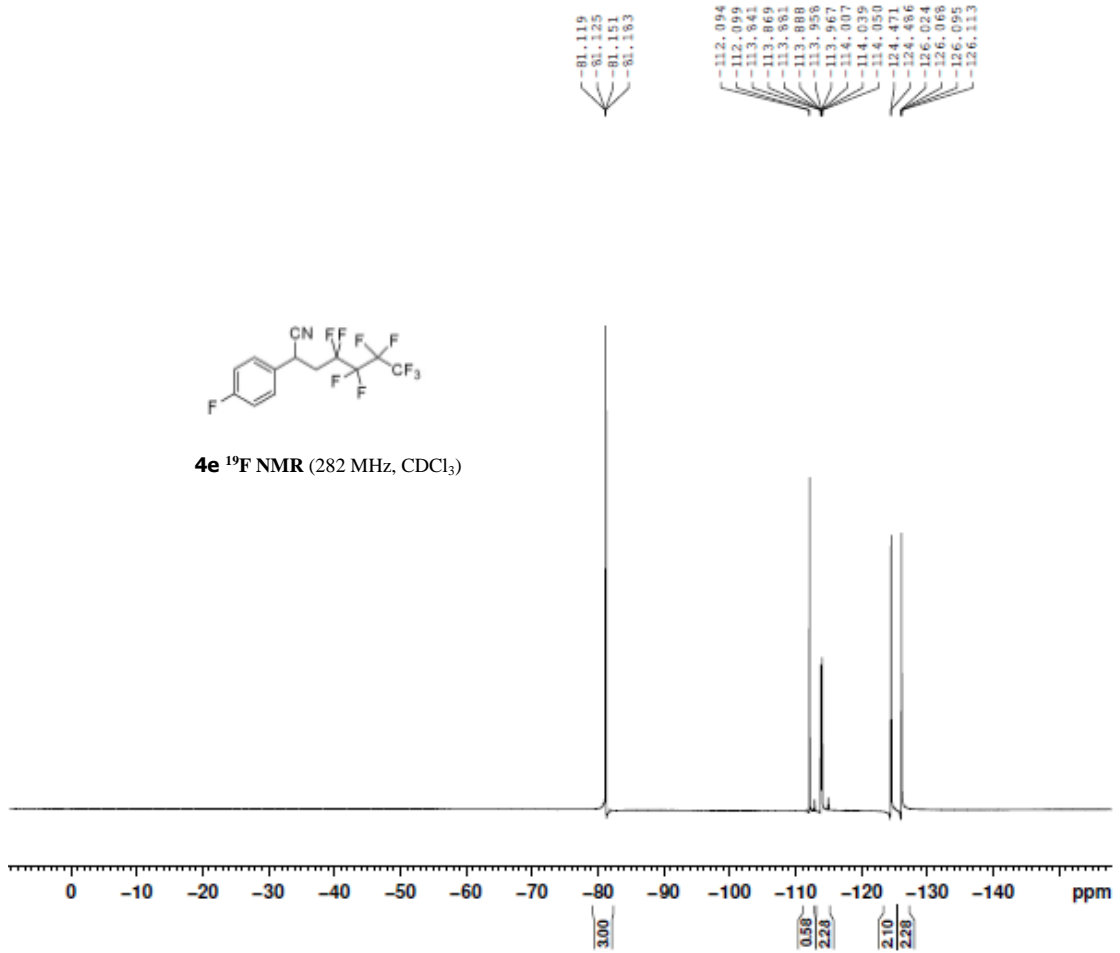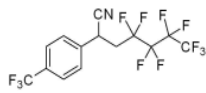

**4f**  $^1\text{H}$  NMR (300 MHz,  $\text{CDCl}_3$ )

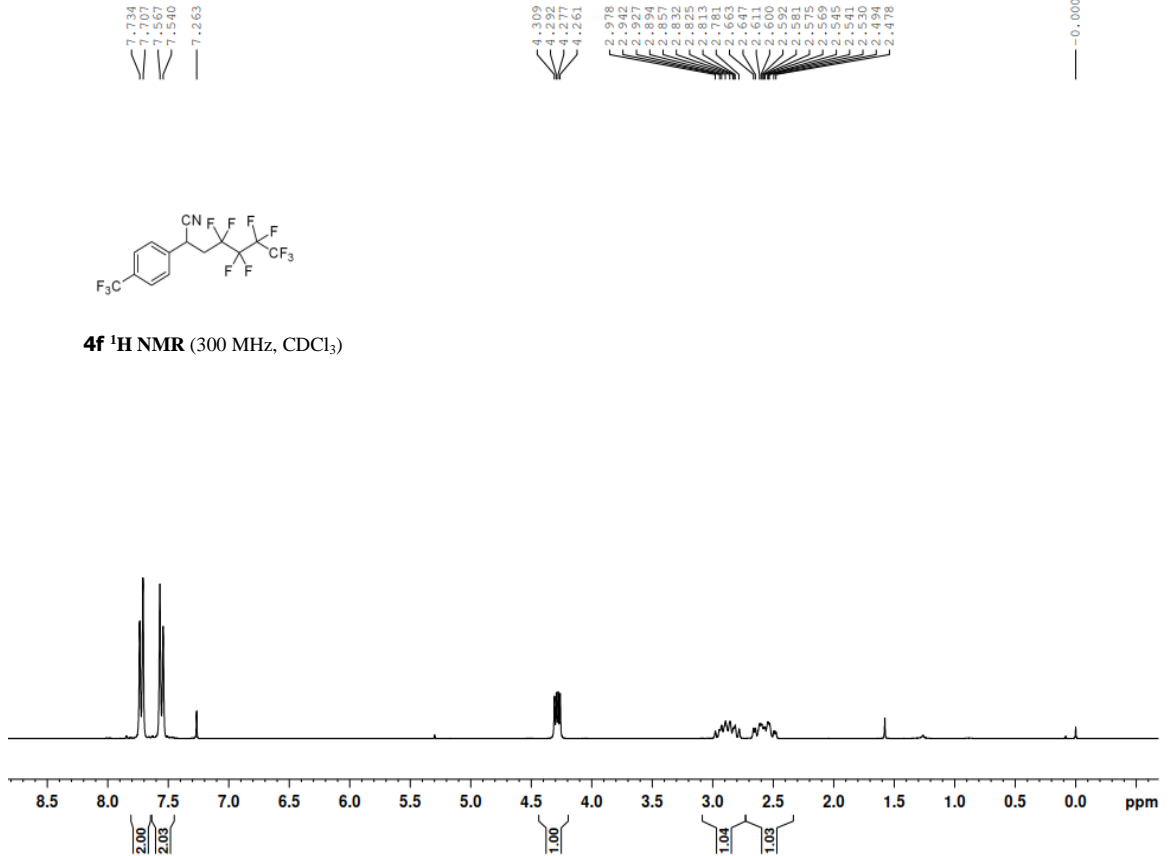

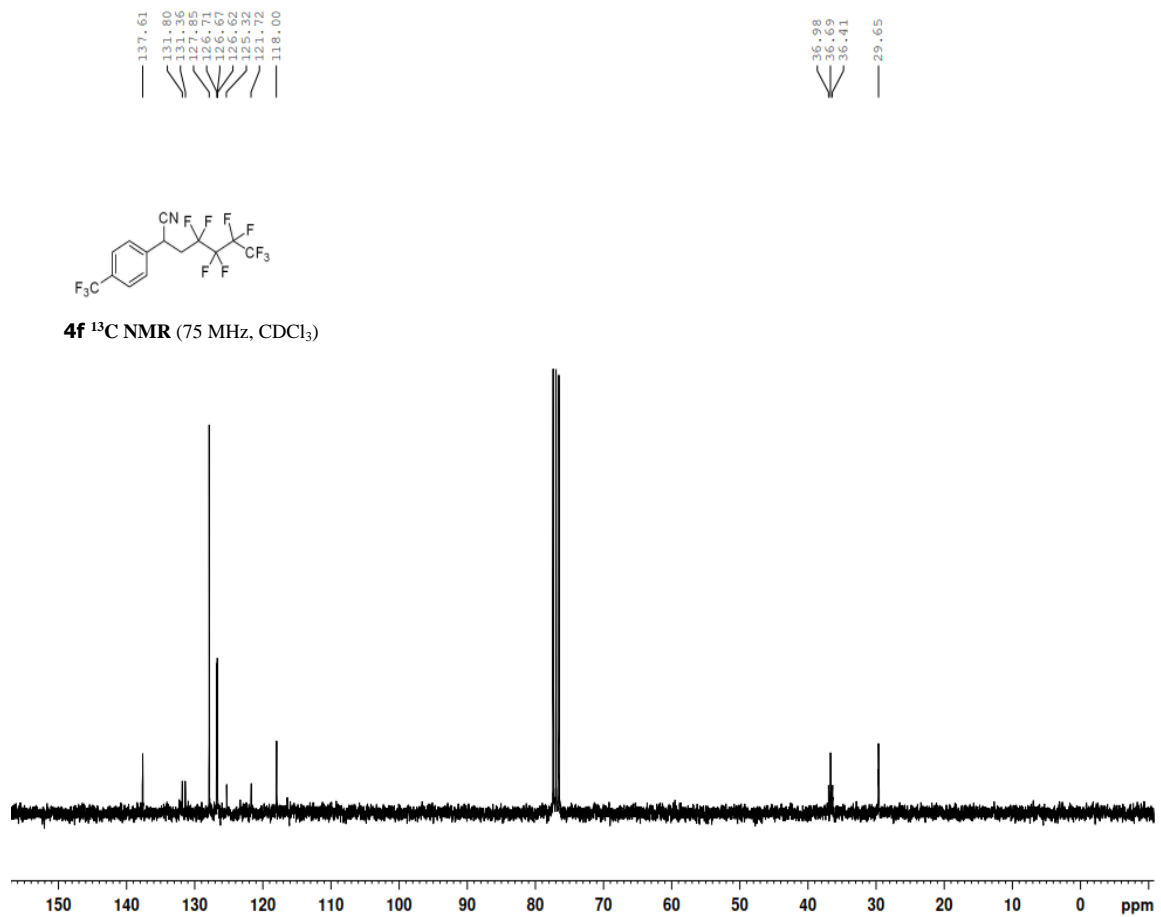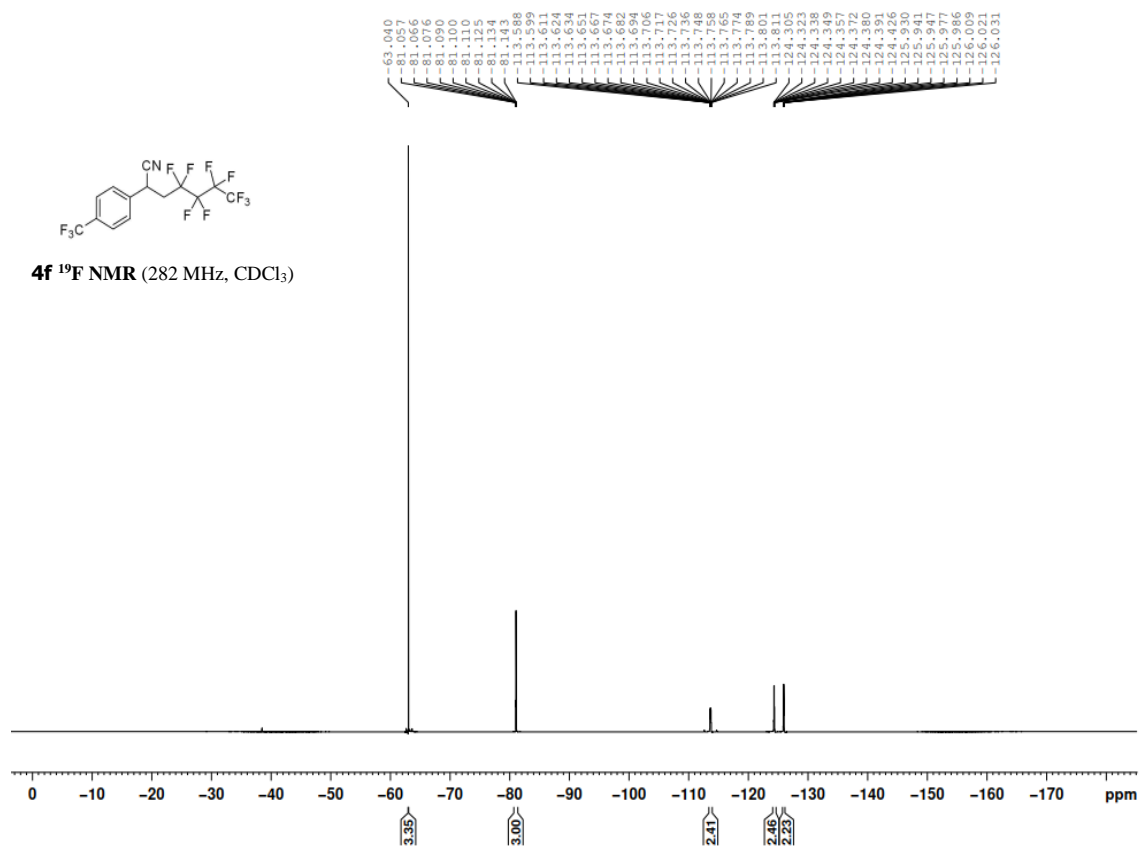

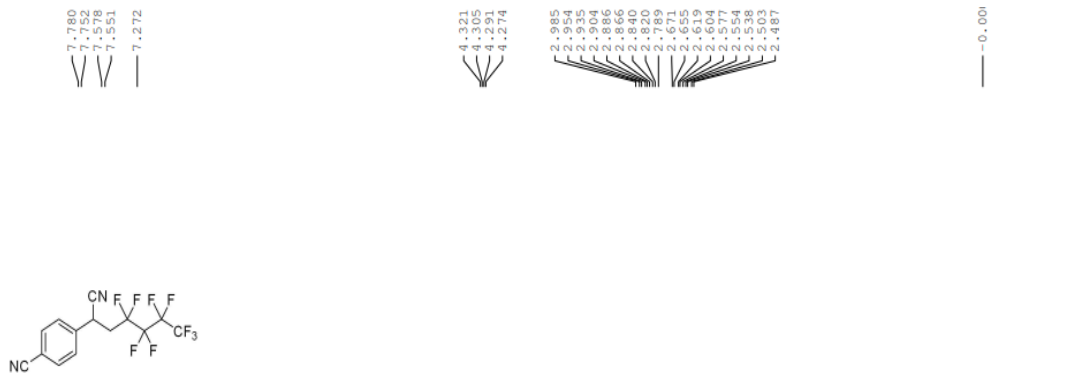

**4g**  $^1\text{H}$  NMR (300 MHz,  $\text{CDCl}_3$ )

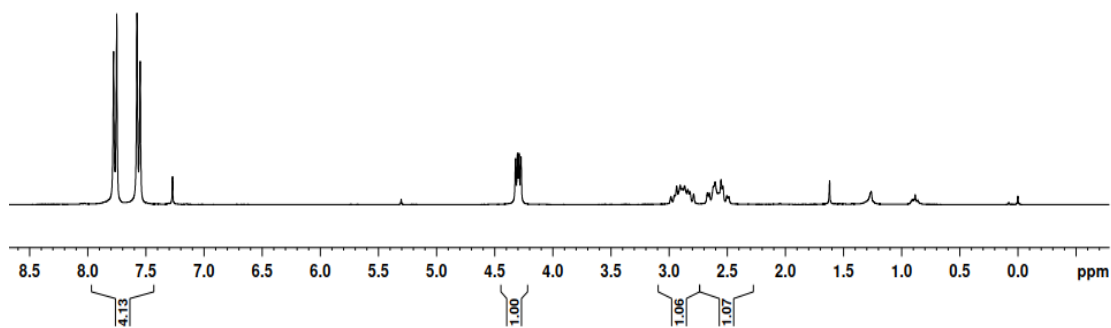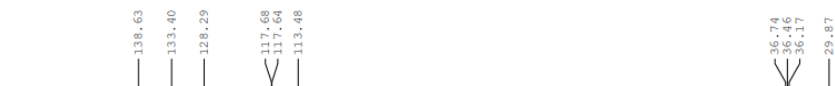

**4g**  $^{13}\text{C}$  NMR (75 MHz,  $\text{CDCl}_3$ )

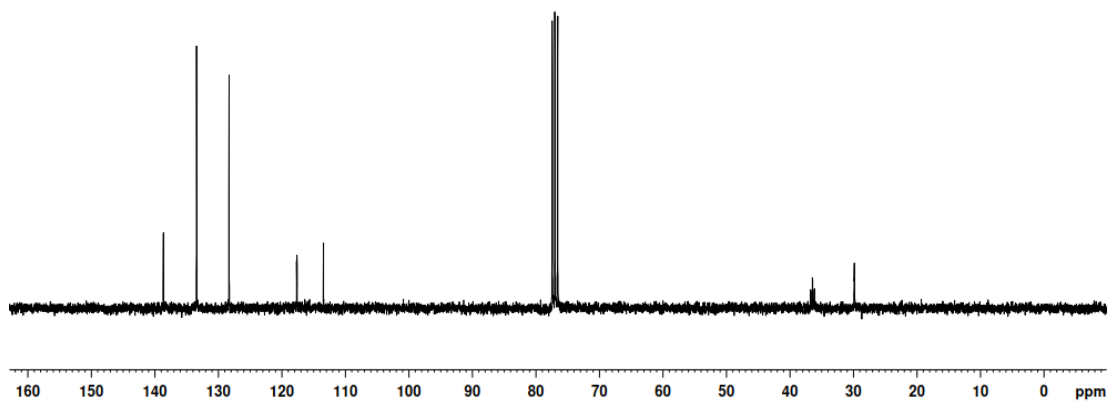

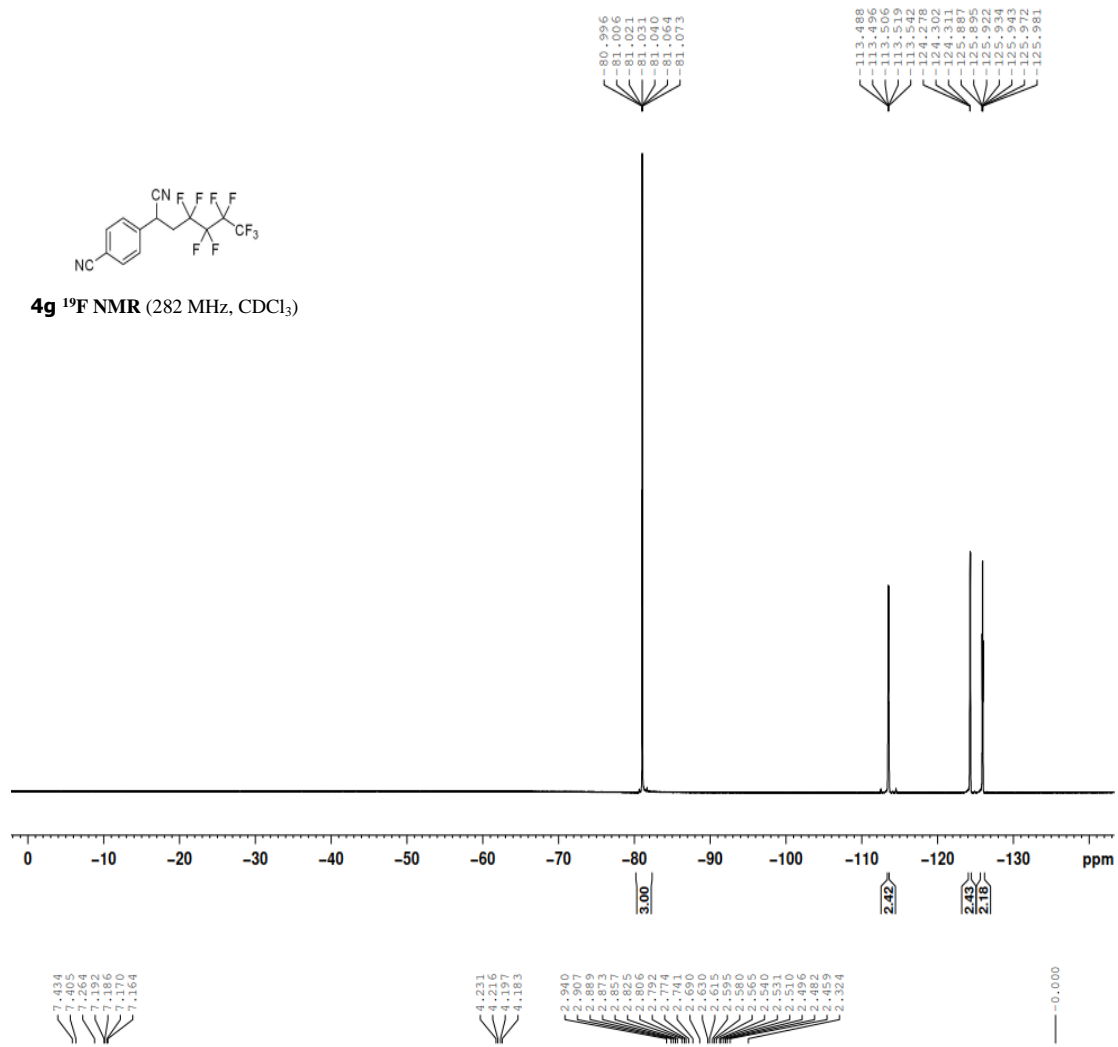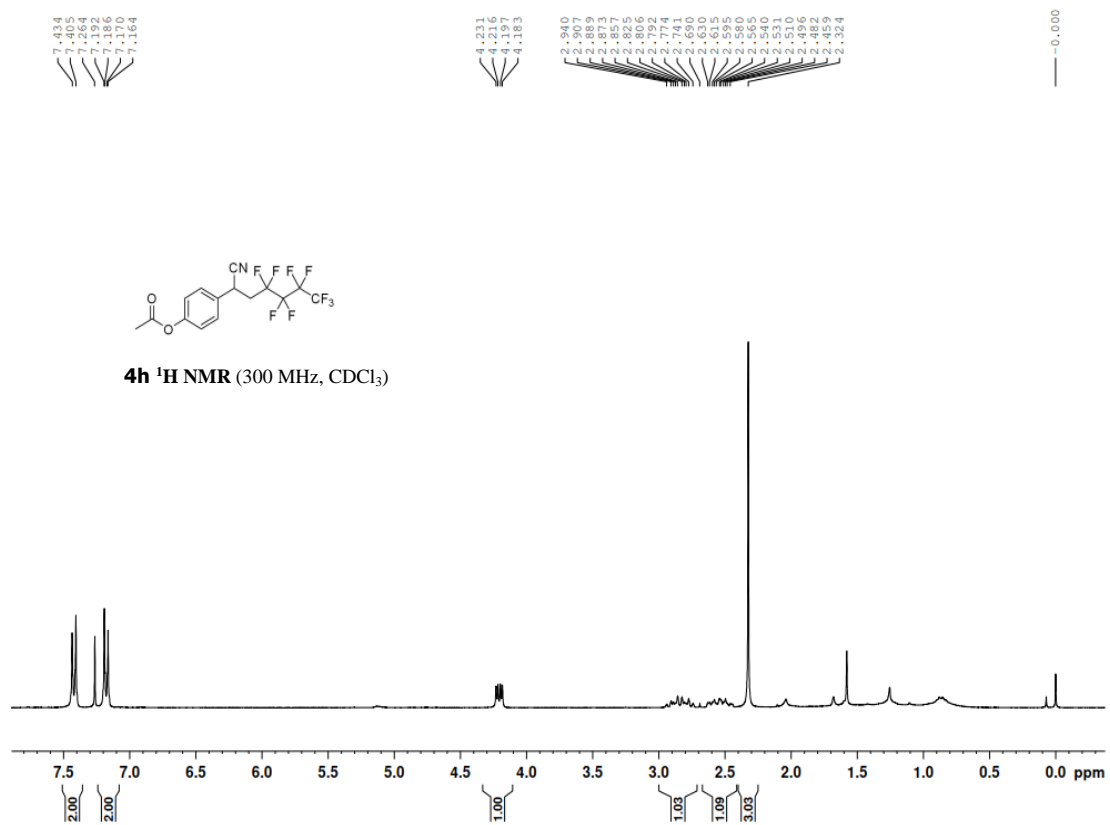

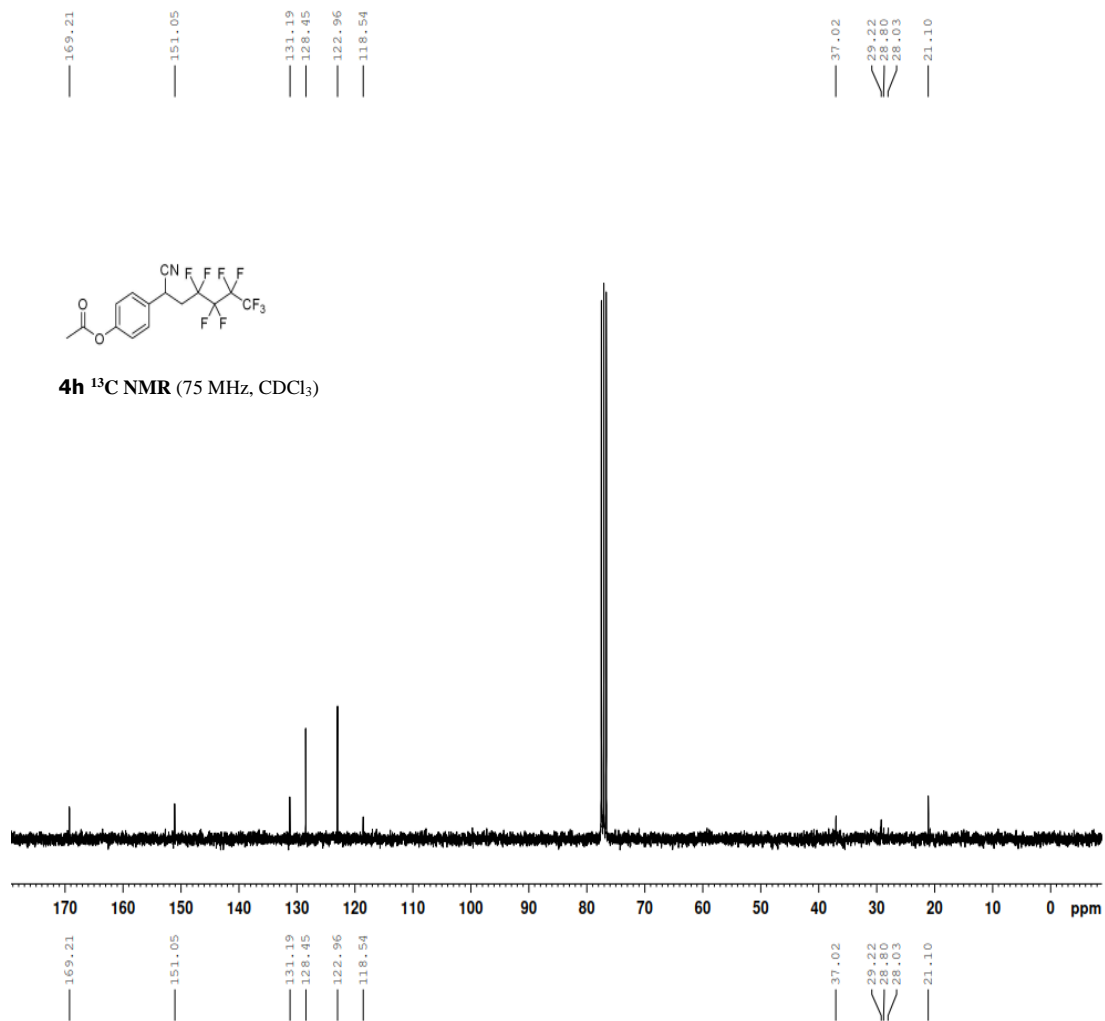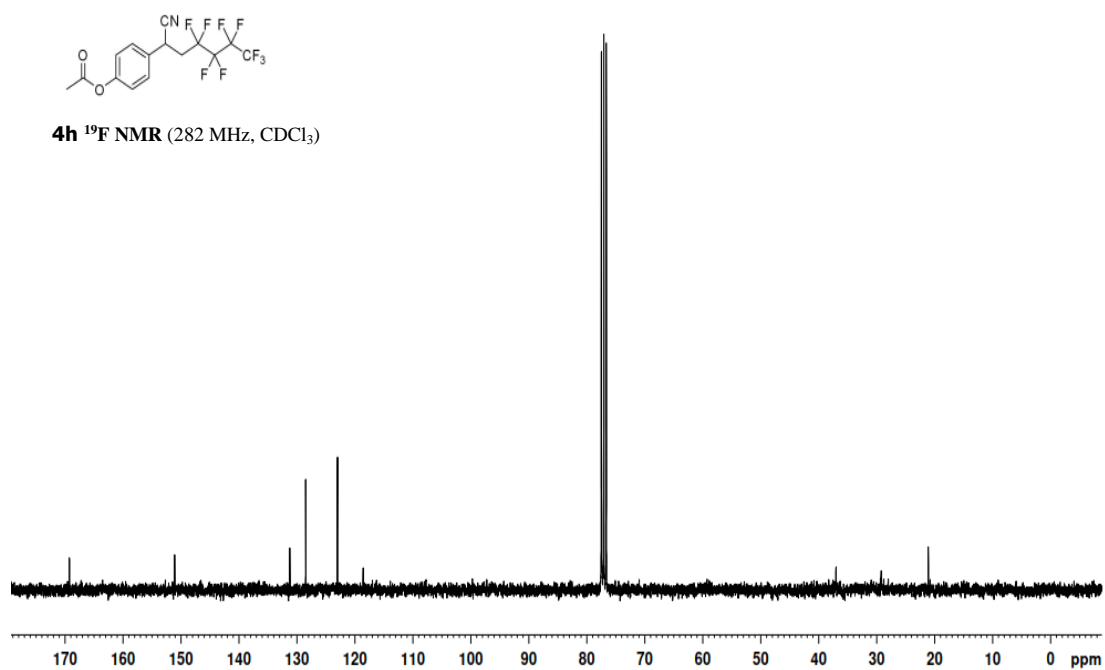

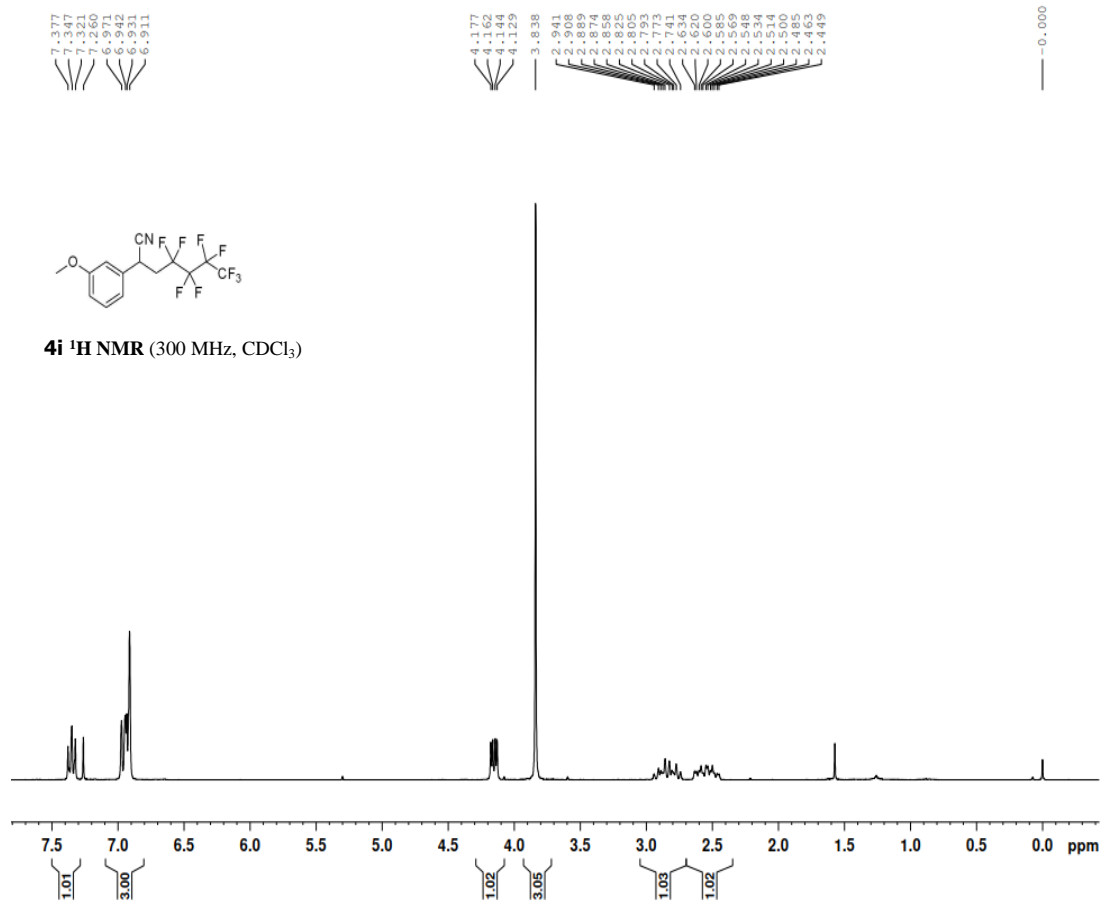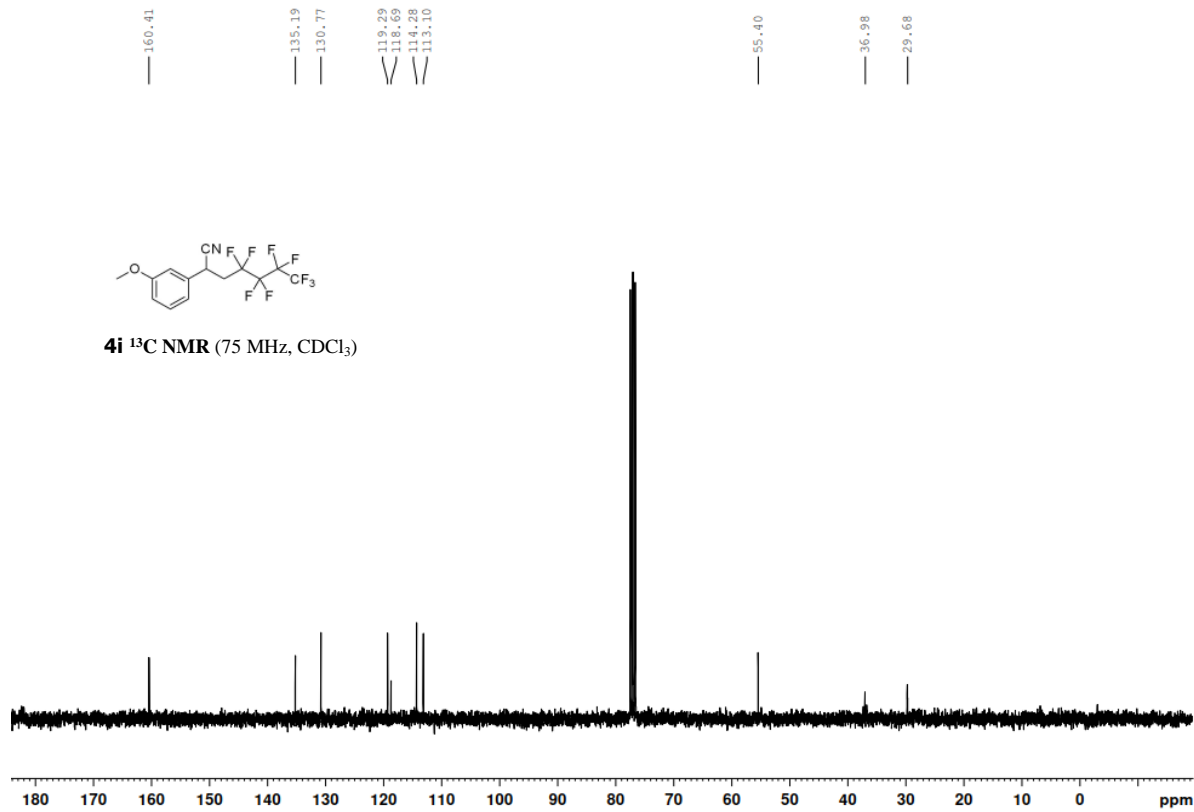

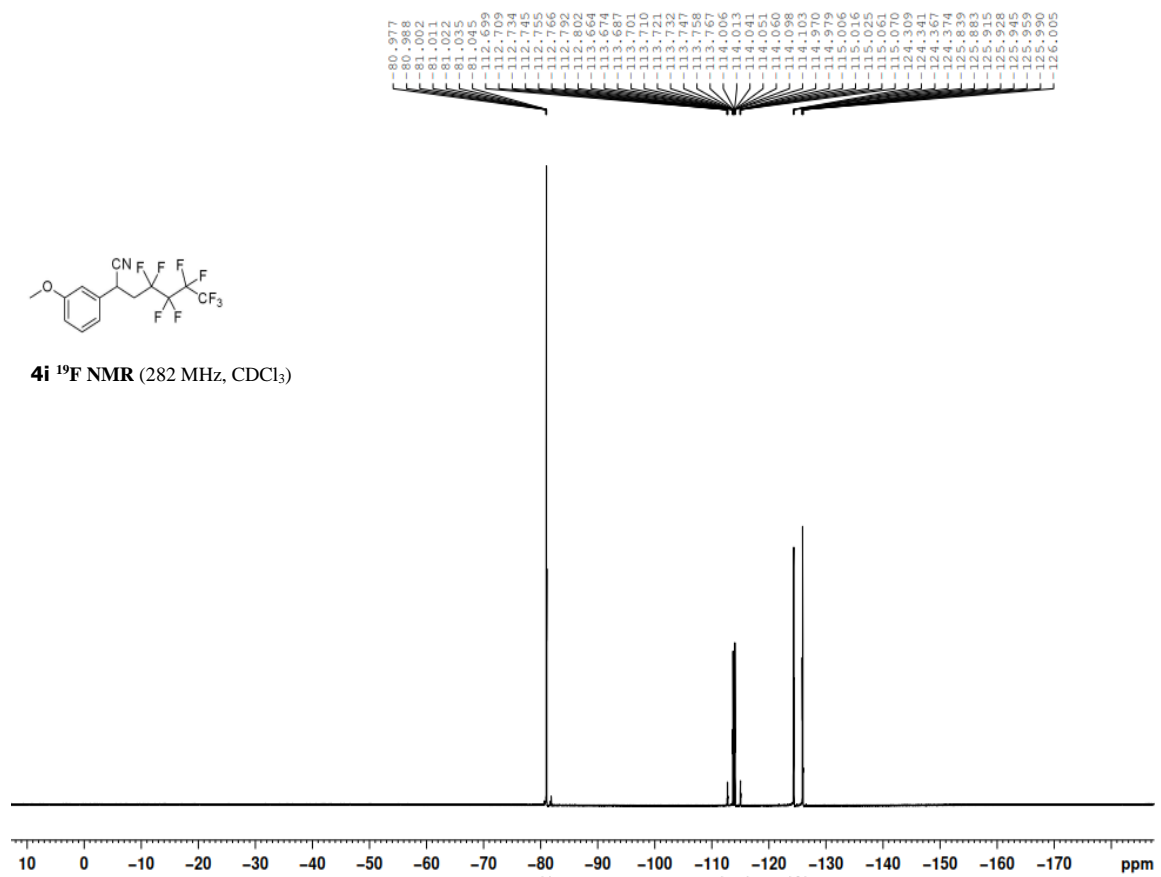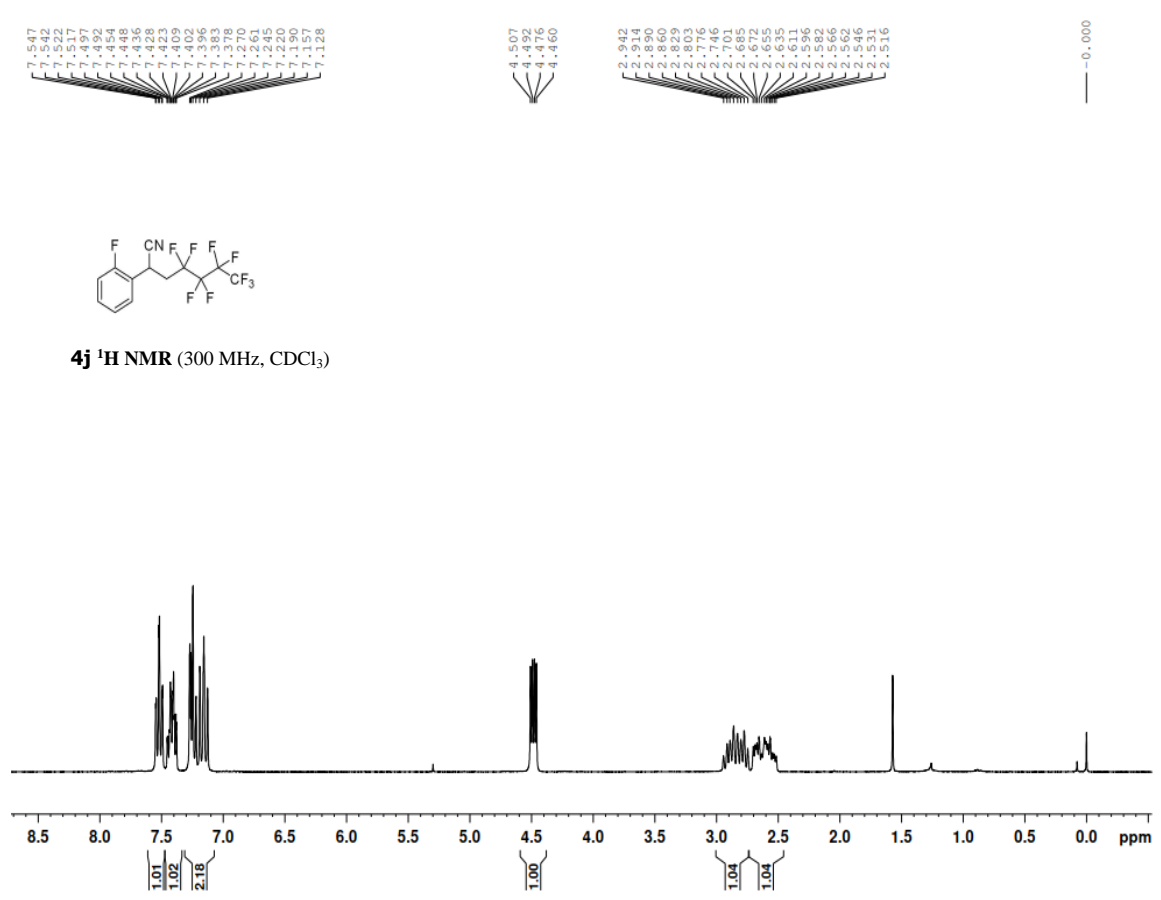



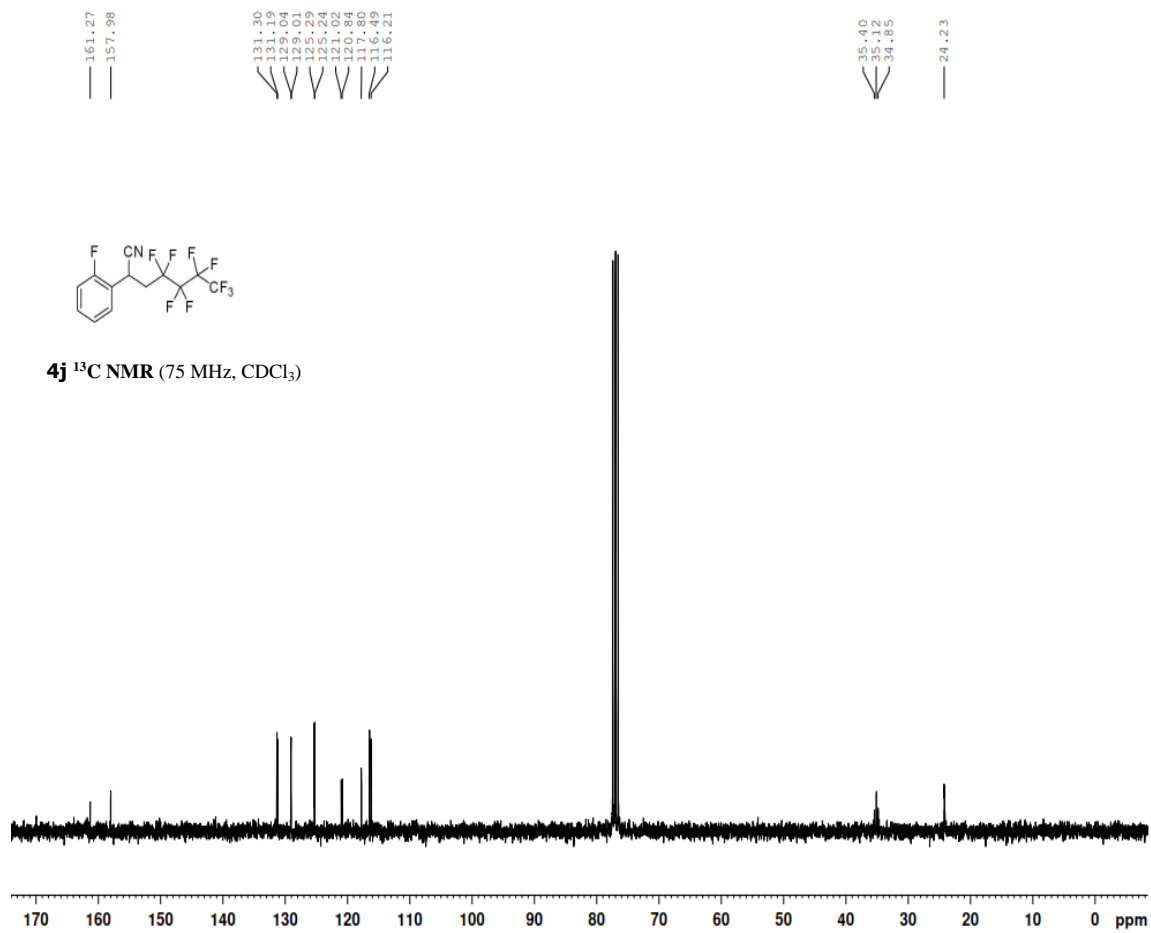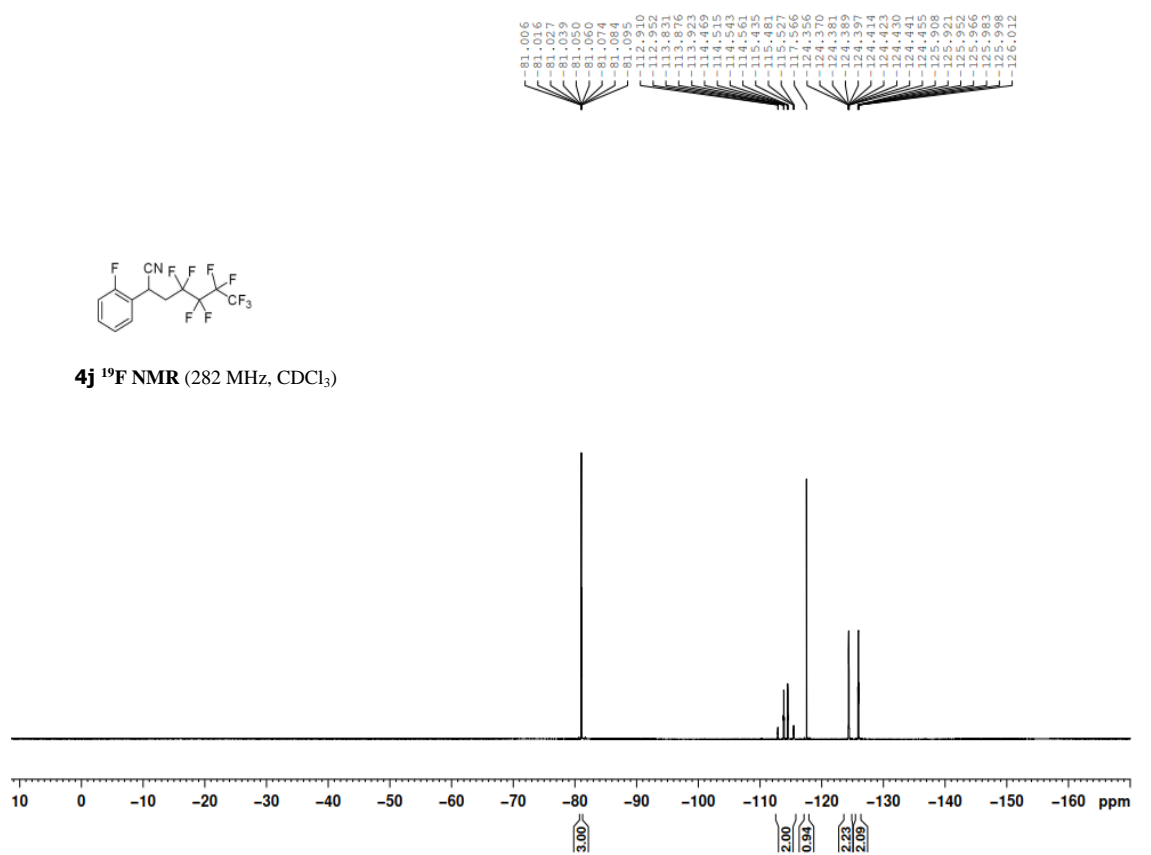

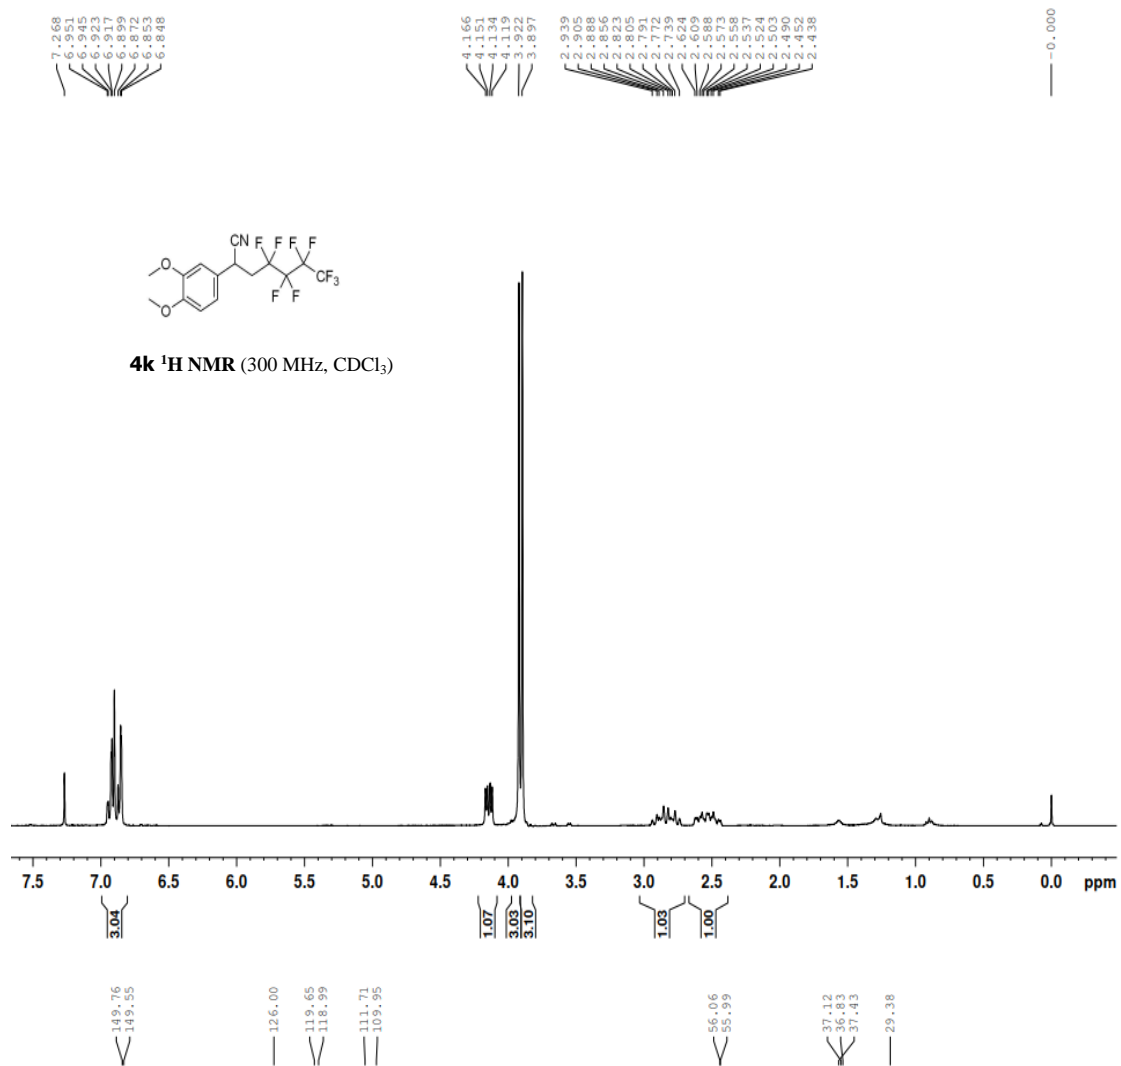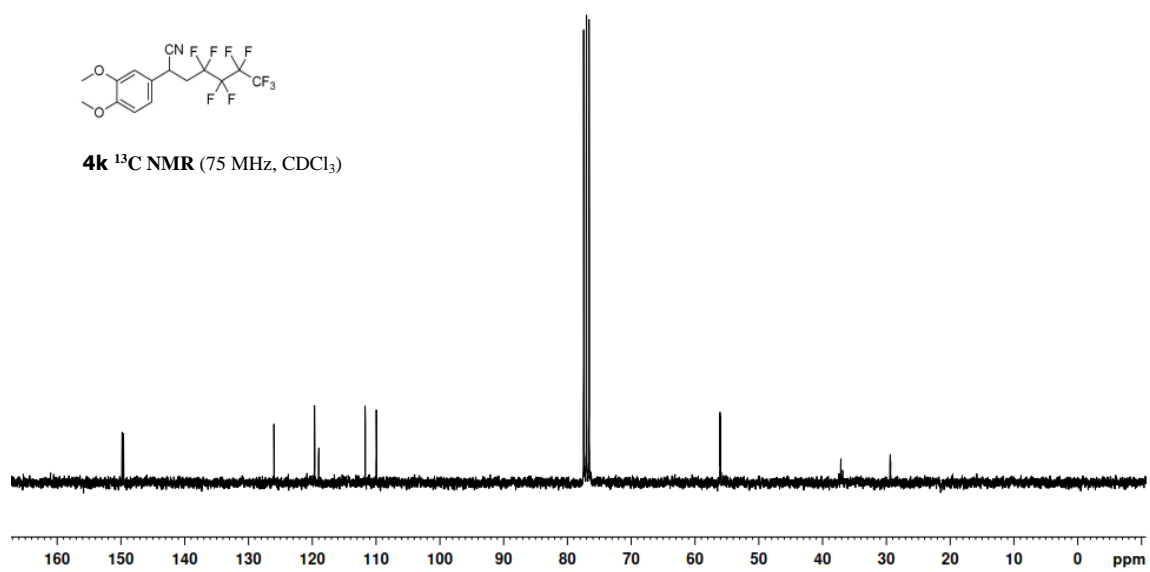

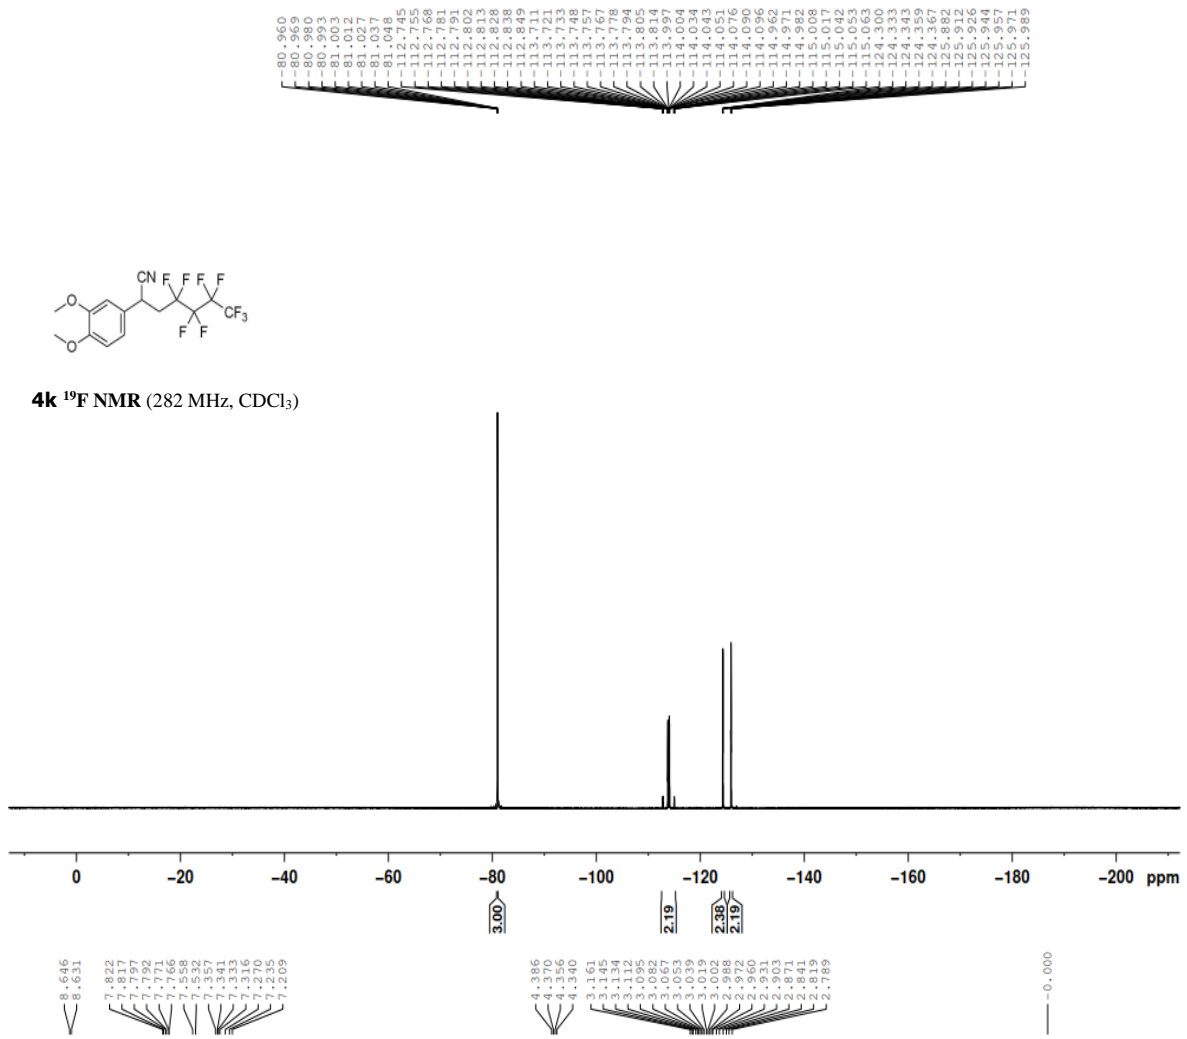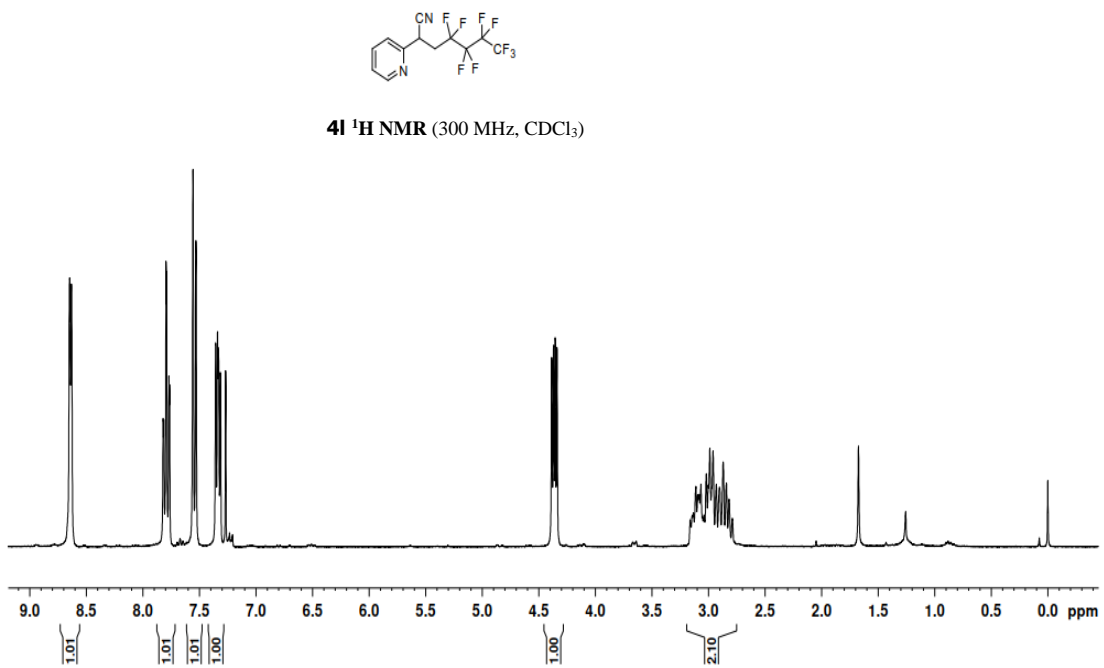

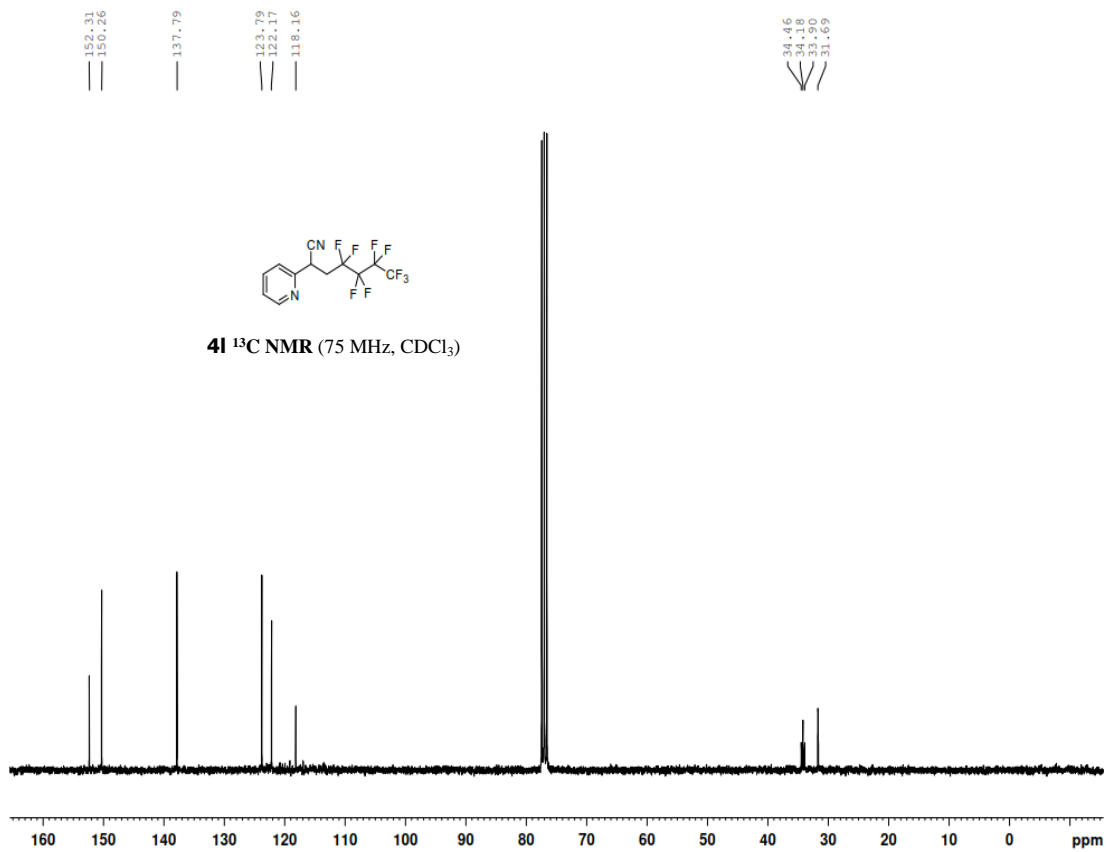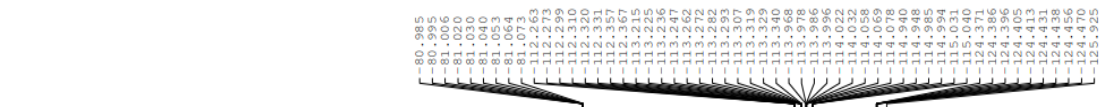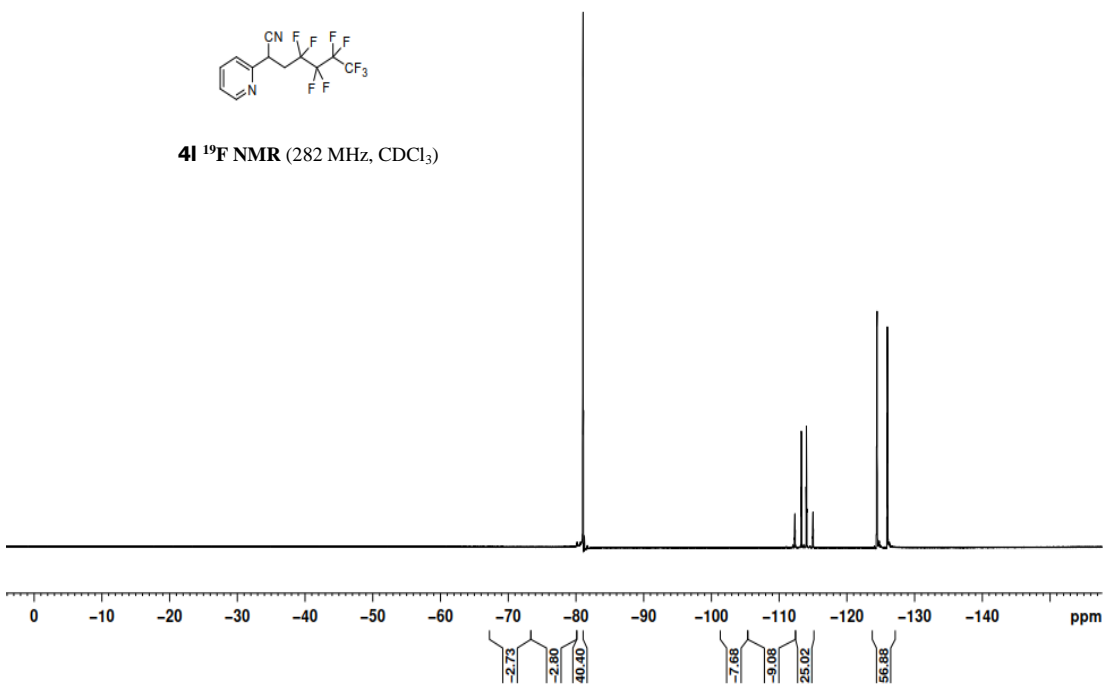

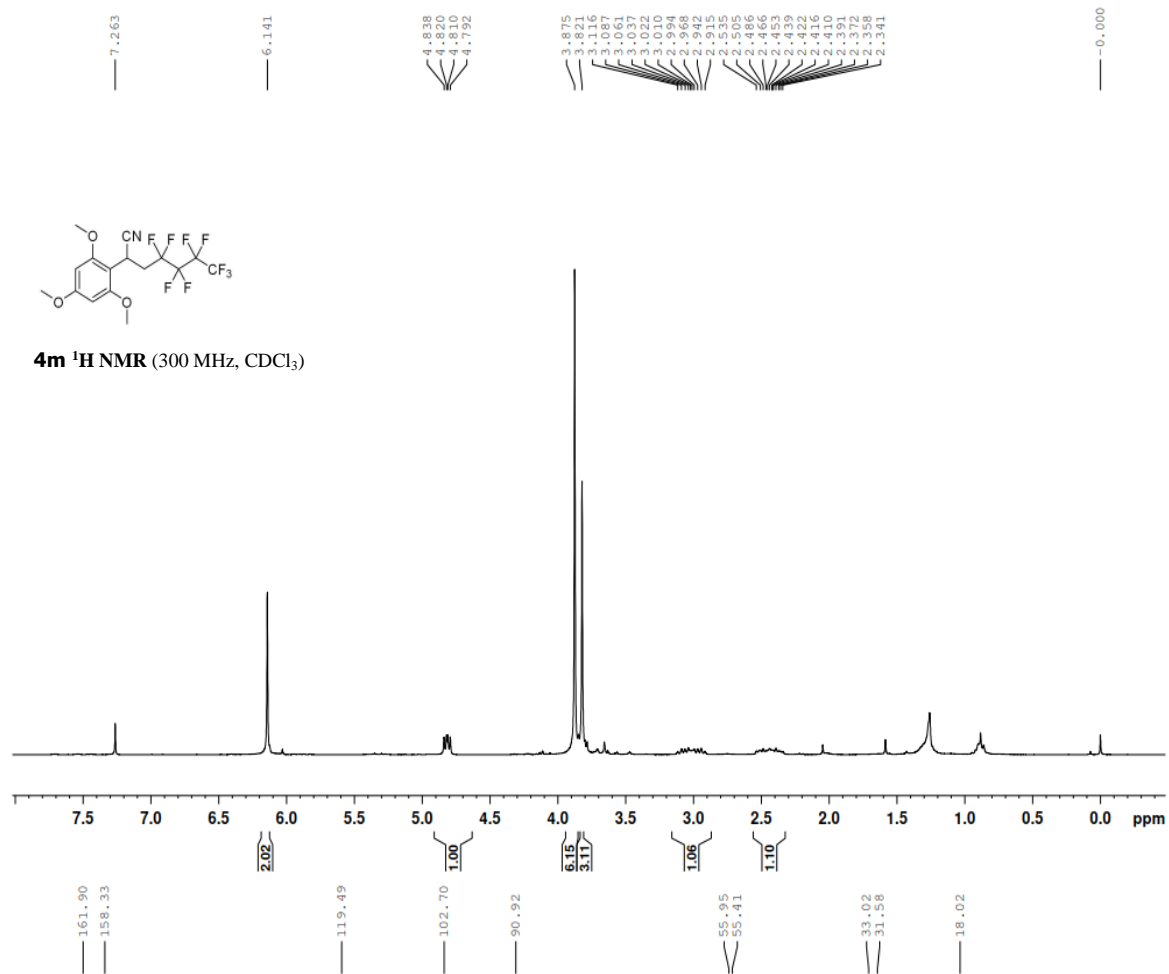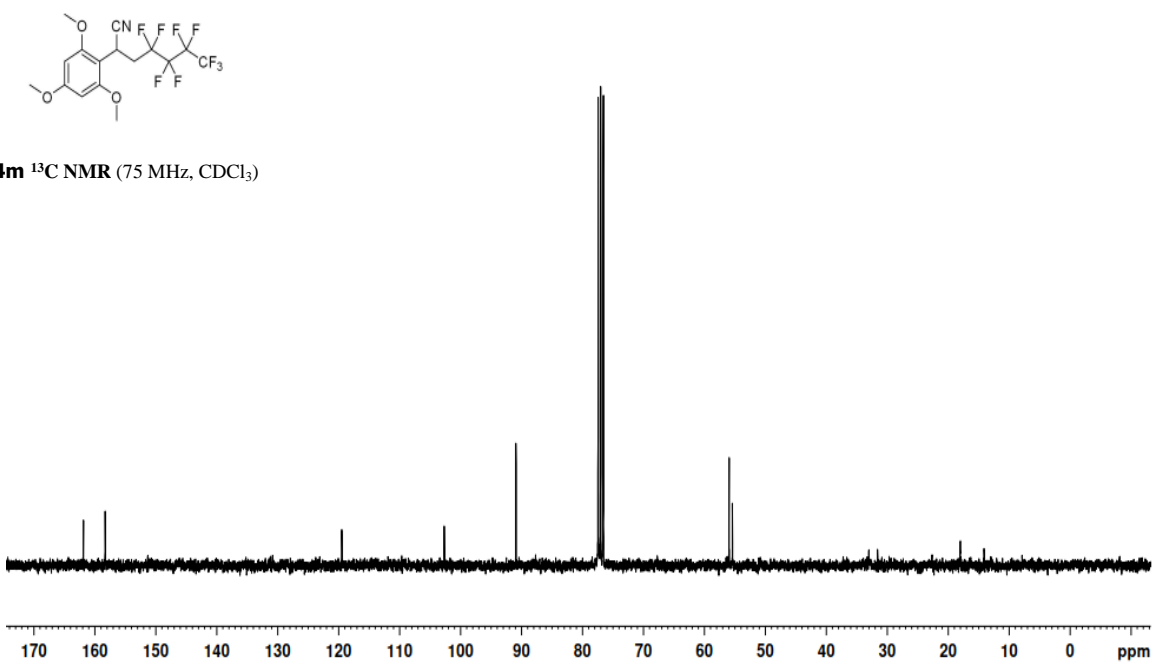

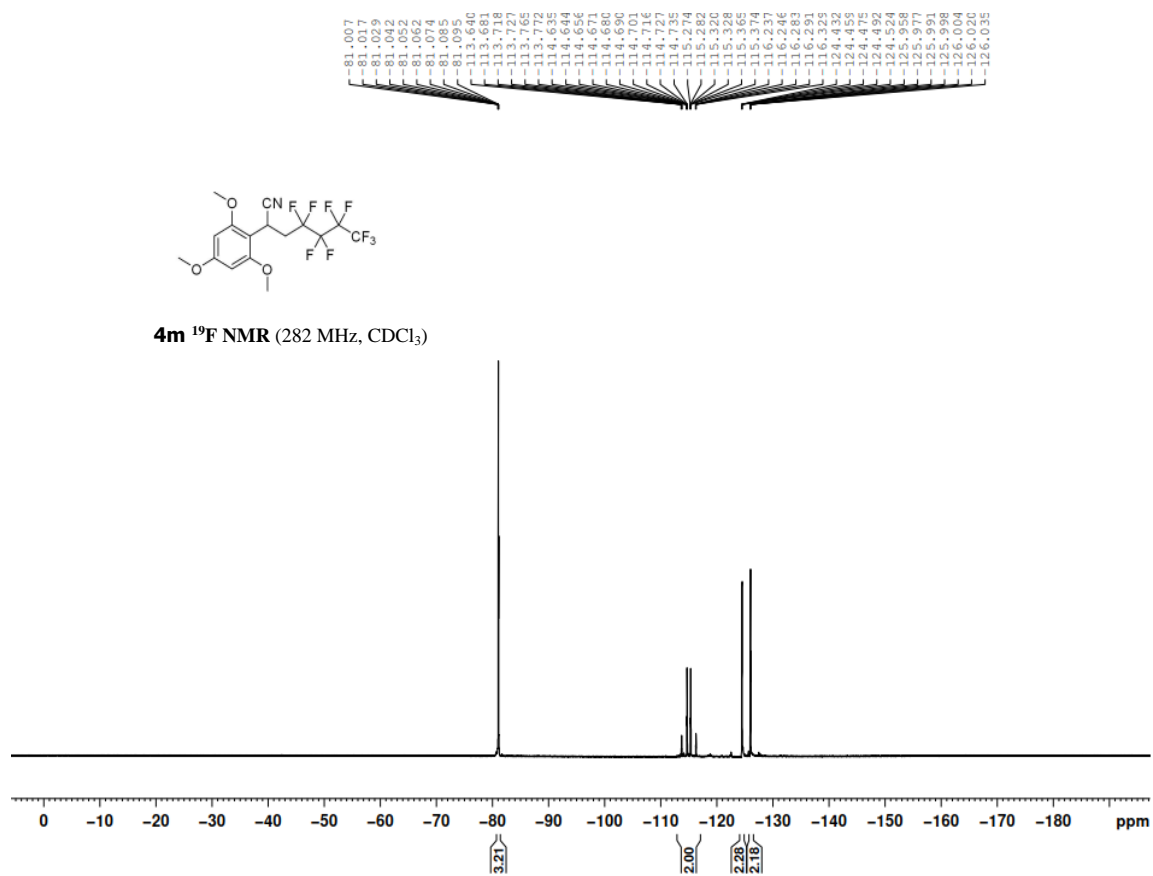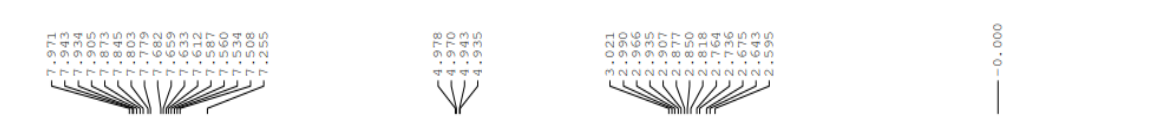

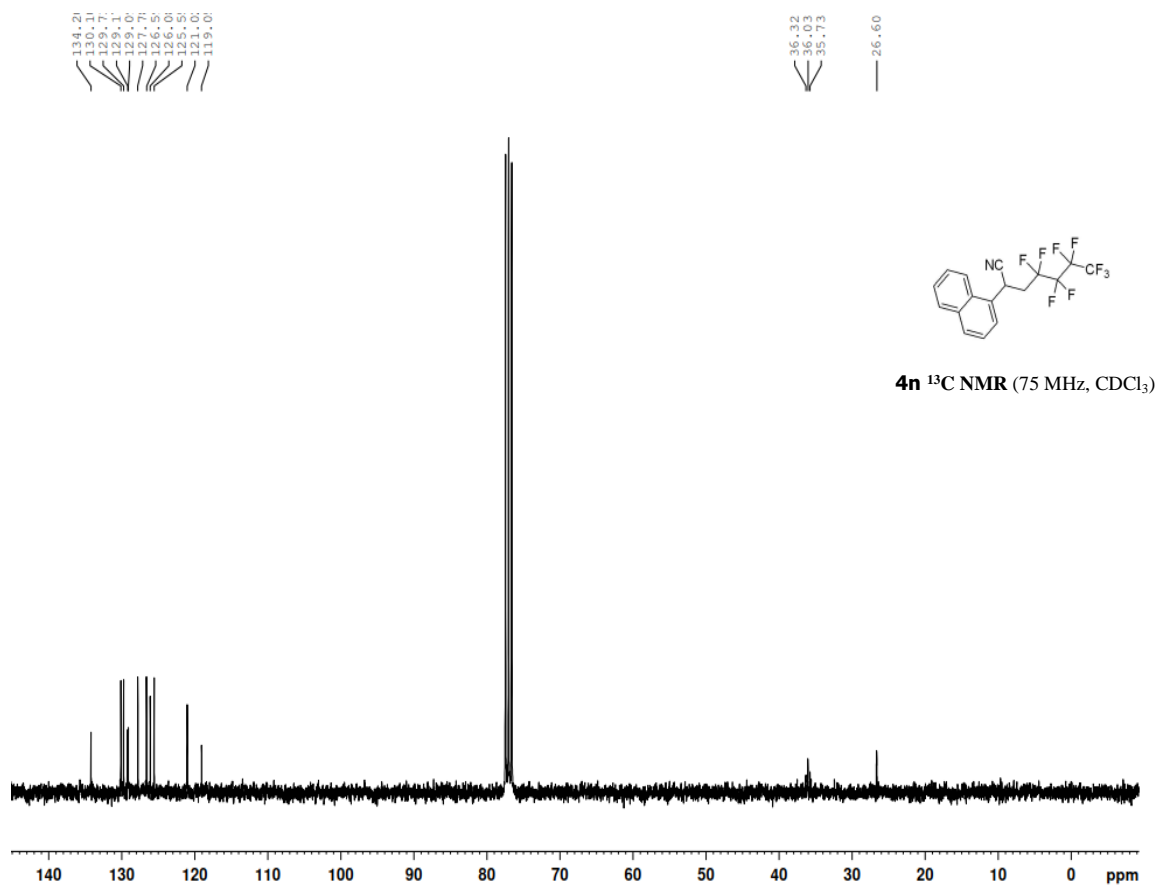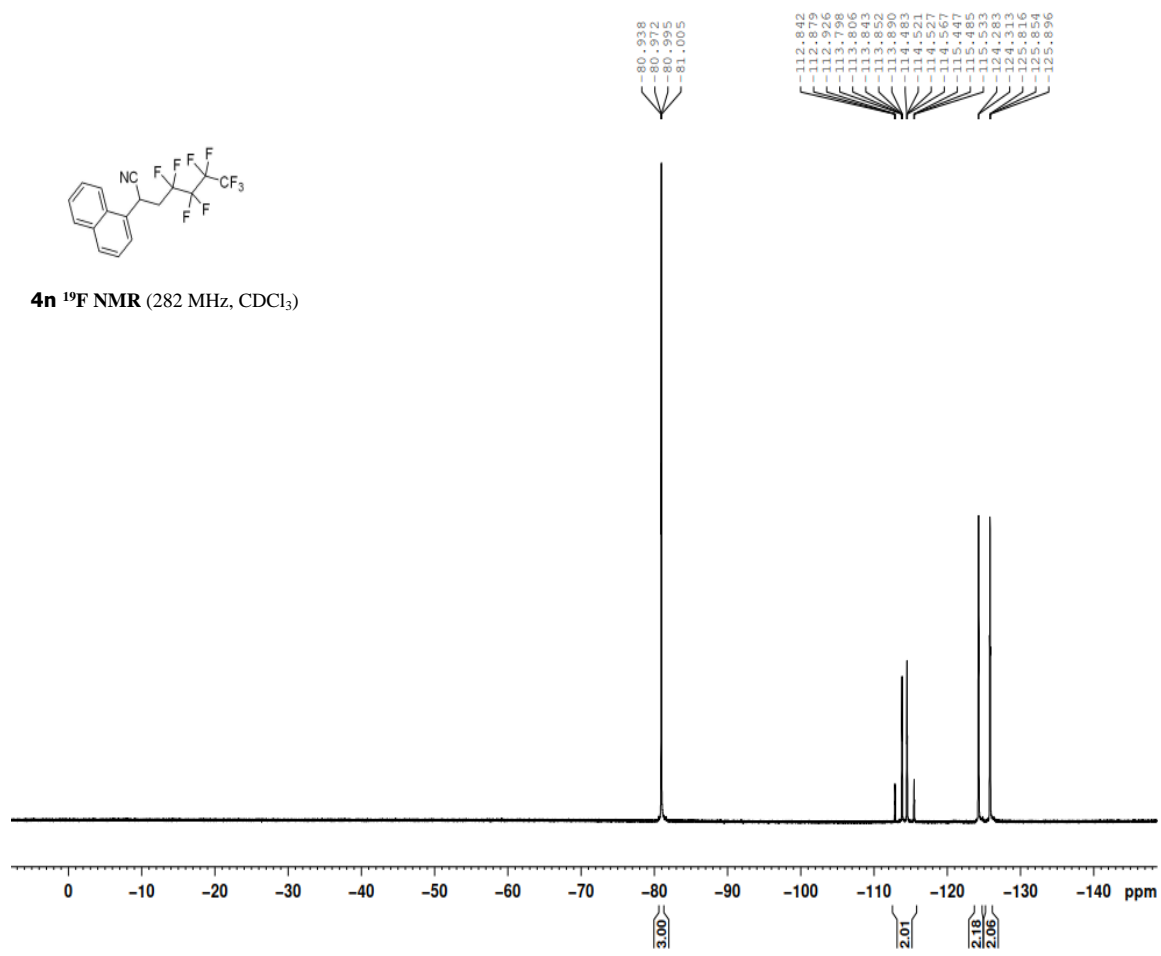

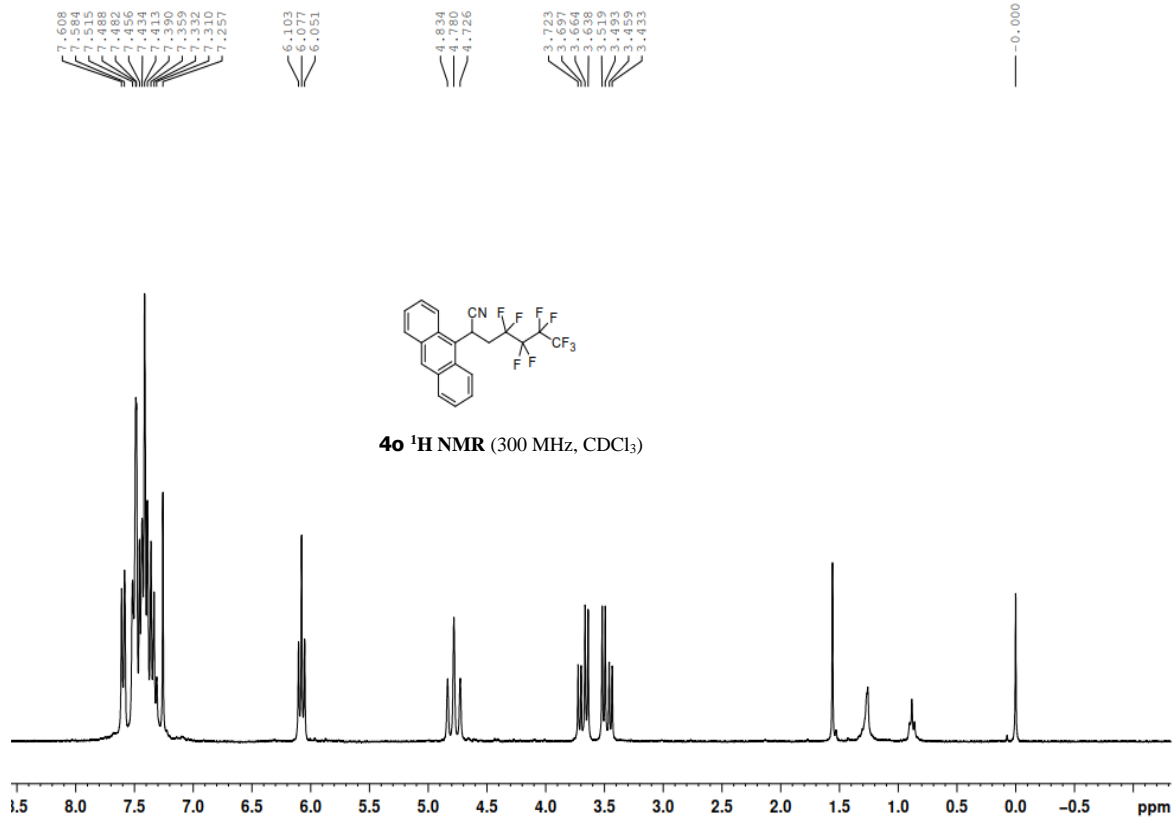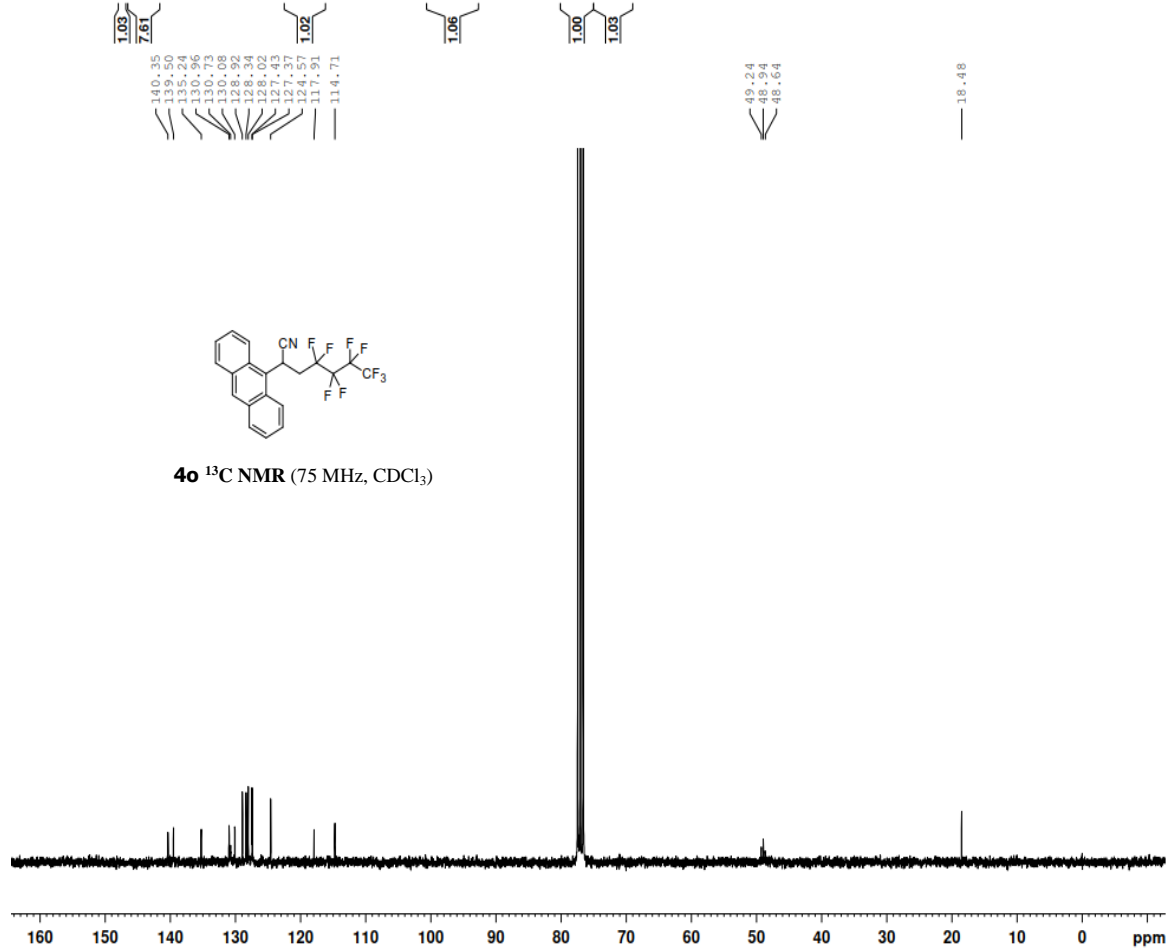



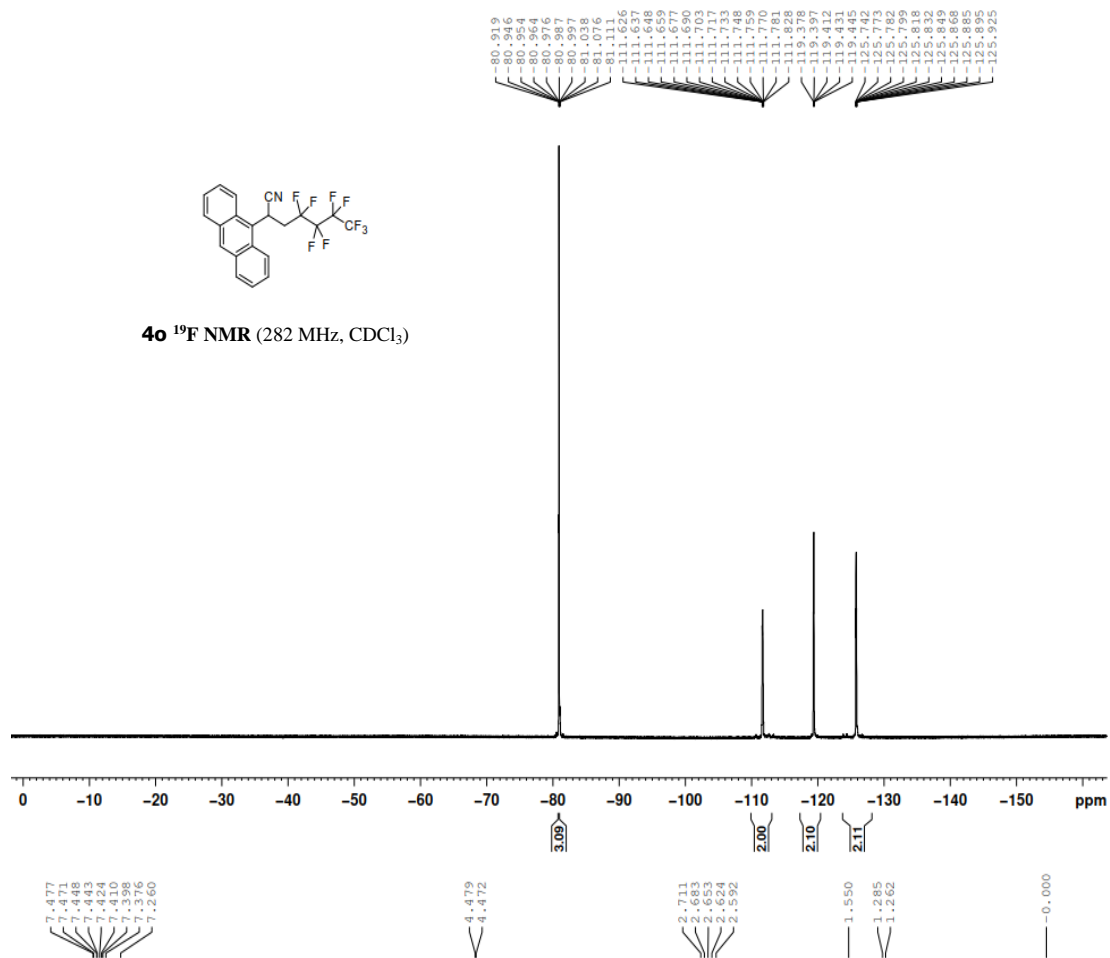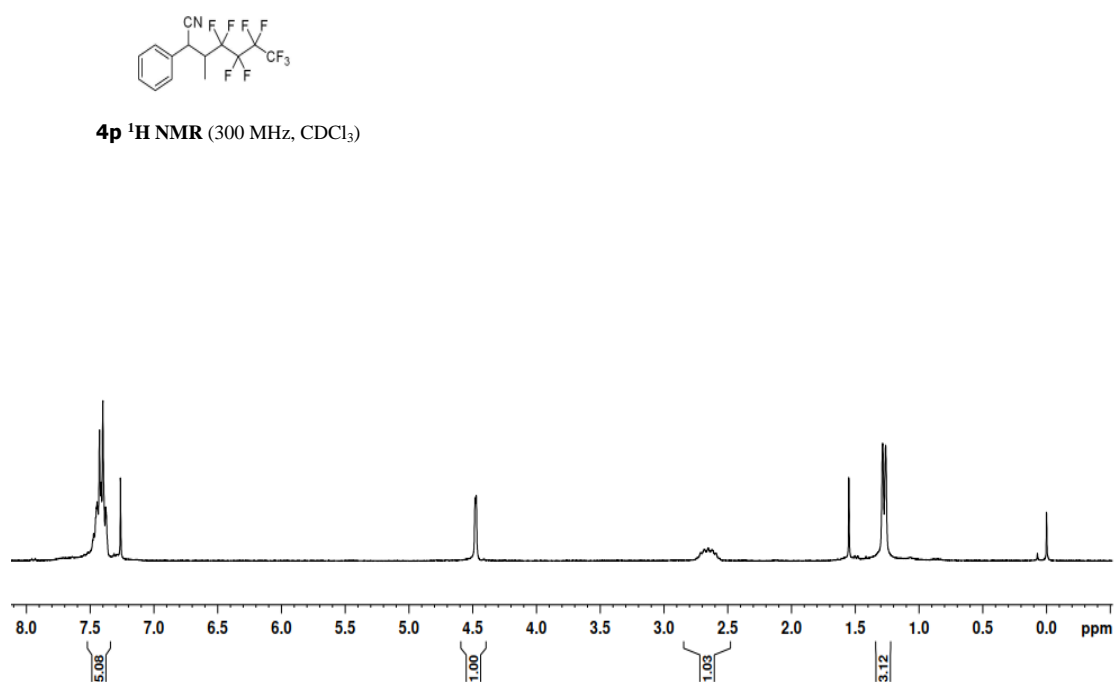

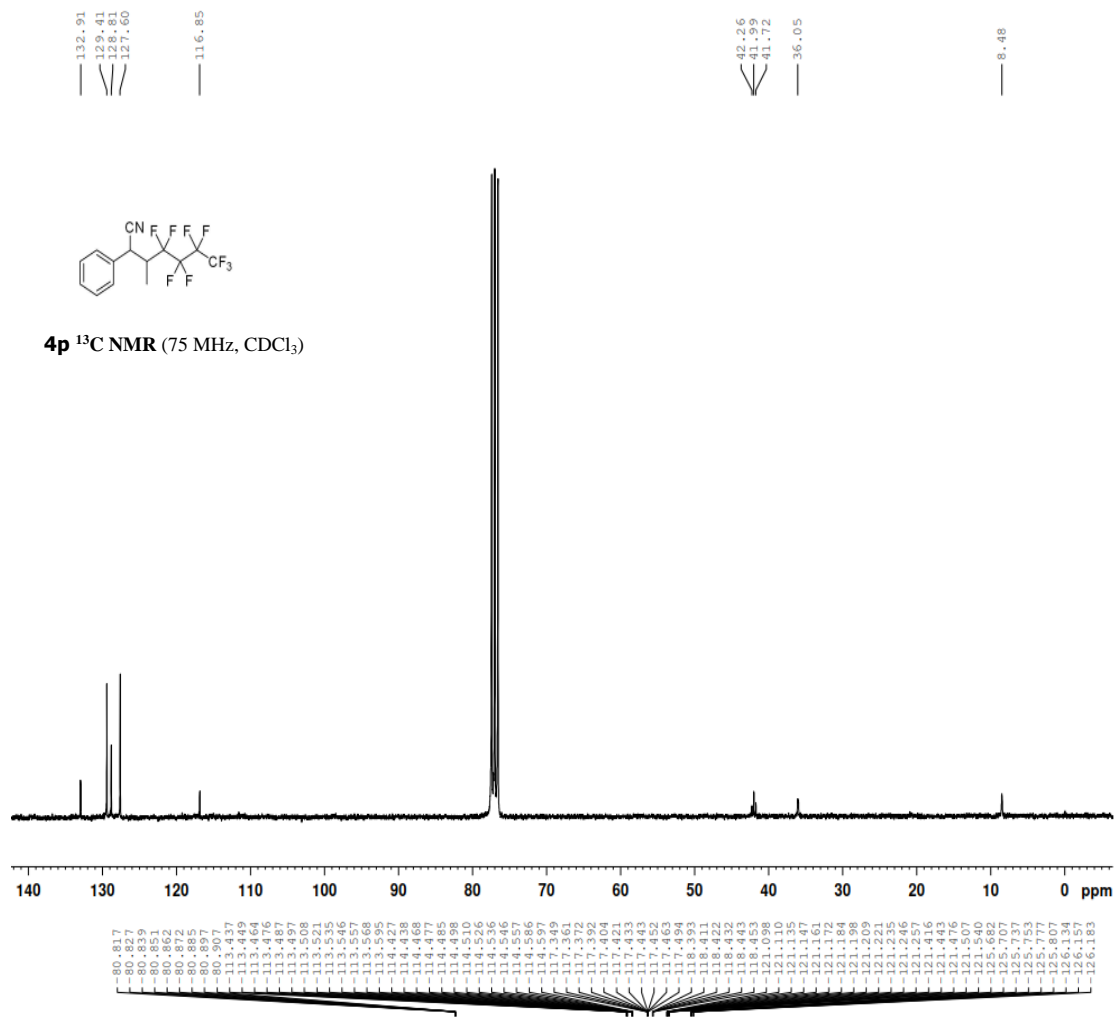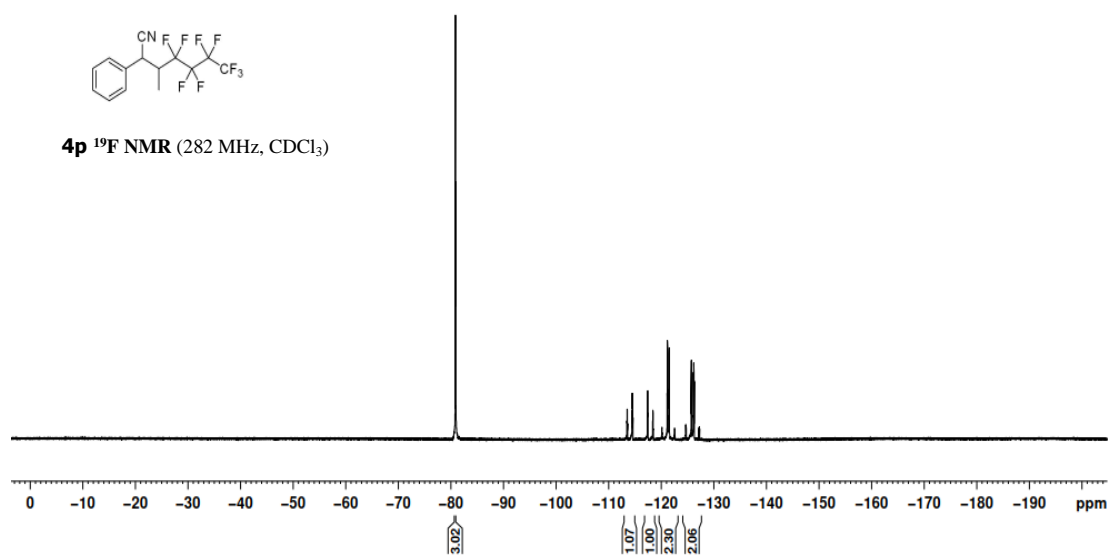

7.402  
7.382  
7.382  
7.353  
7.347  
7.331  
7.316  
7.306  
7.289  
7.260

3.270  
3.253  
3.246  
3.223  
3.217  
3.206  
3.201  
3.177  
3.107  
3.082  
3.061  
3.037  
3.028  
3.005  
2.984  
2.559  
2.543  
2.512  
2.499  
2.425  
2.411  
2.390  
2.373  
2.341  
2.327  
2.306  
2.290  
2.254  
2.239  
2.239

— 0.000

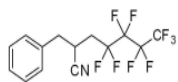

**6a** <sup>1</sup>H NMR (300 MHz, CDCl<sub>3</sub>)

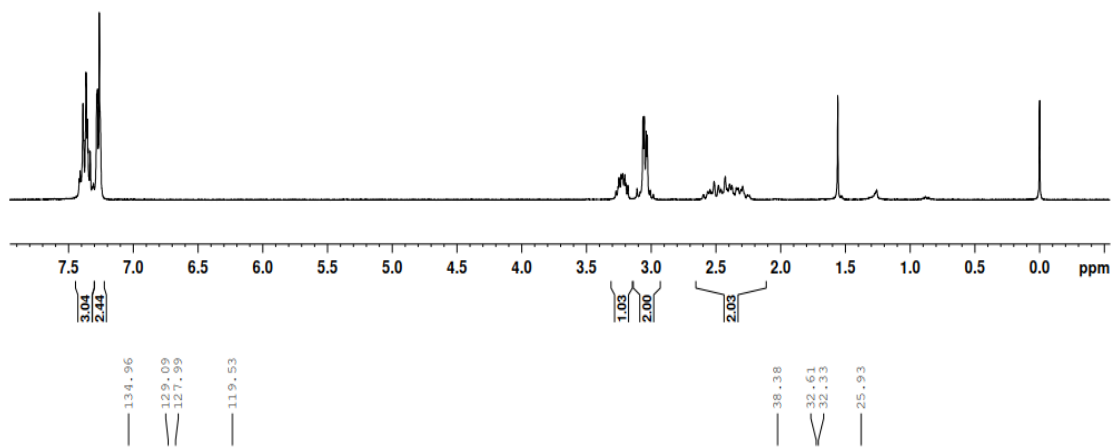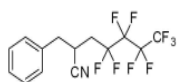

**6a** <sup>13</sup>C NMR (75 MHz, CDCl<sub>3</sub>)

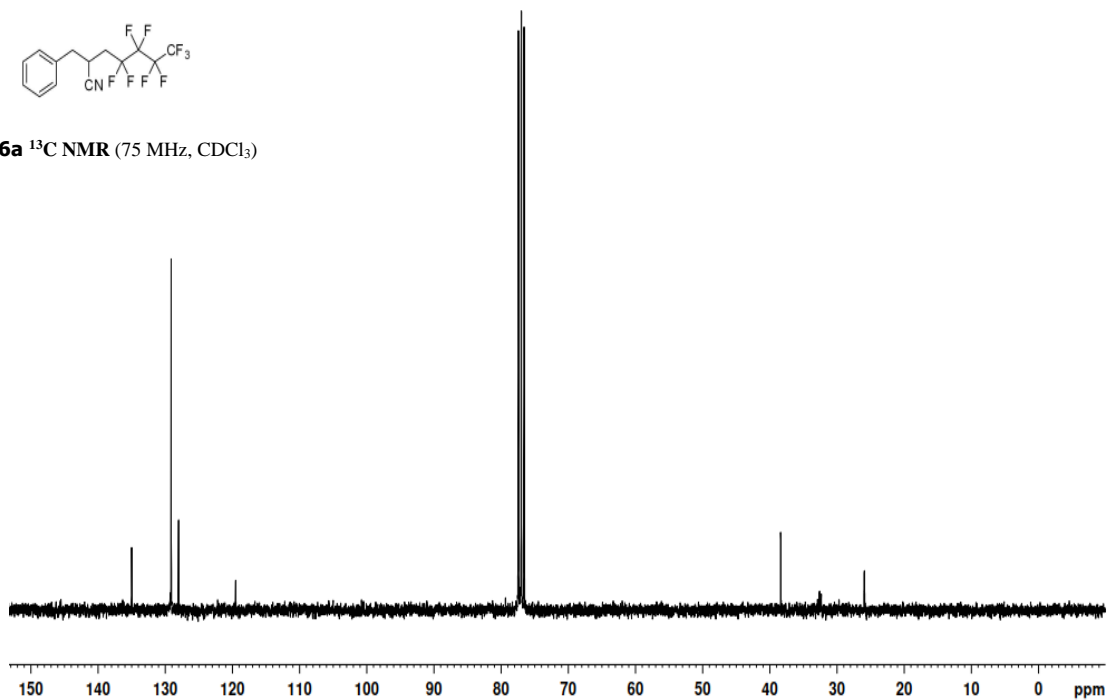



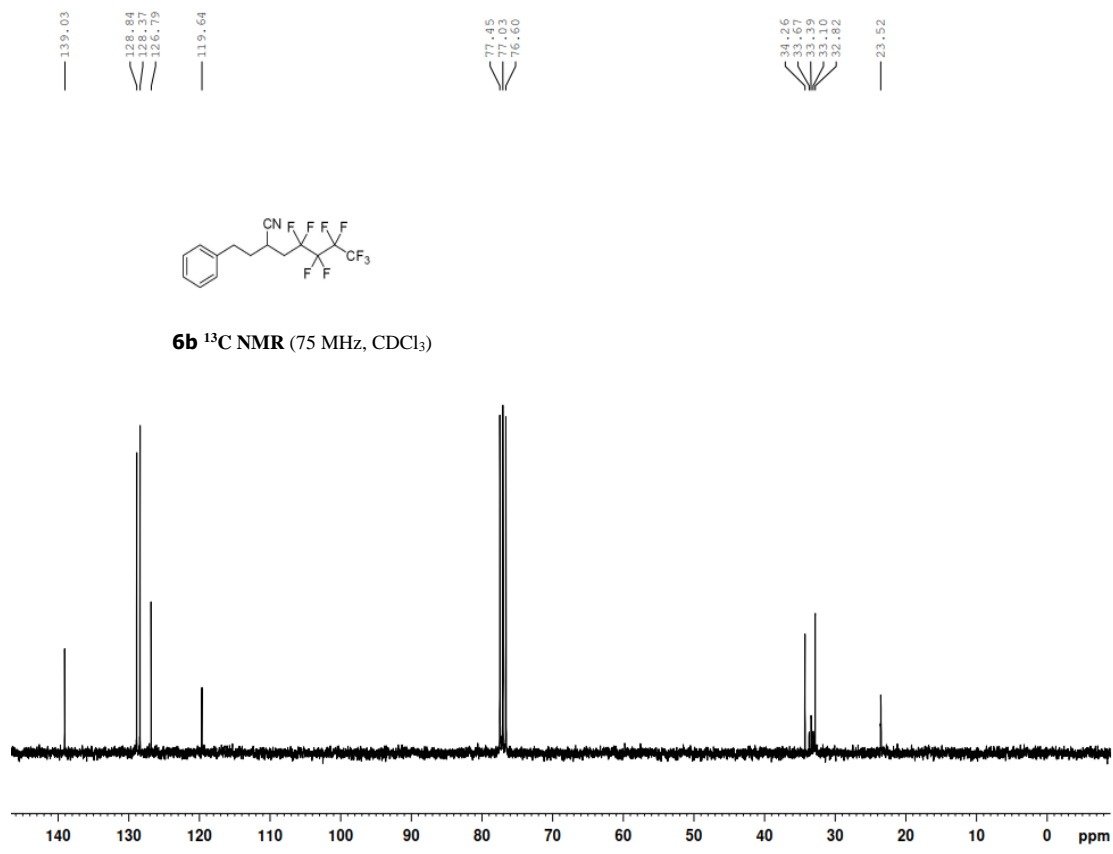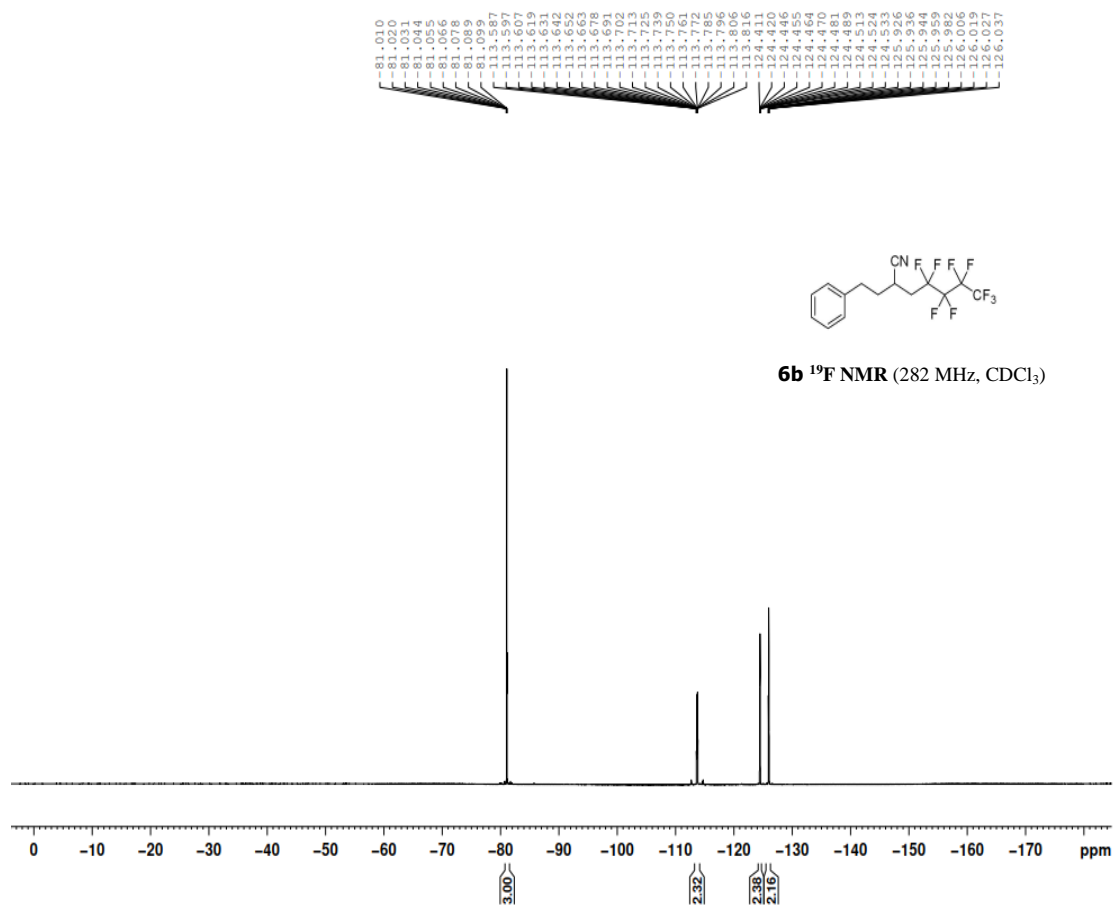

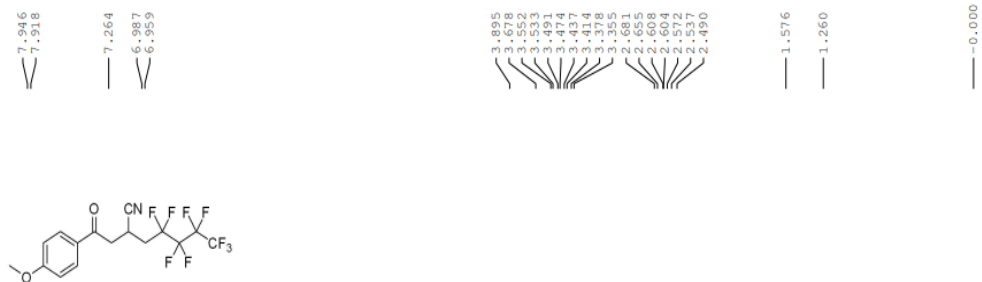

**6c** <sup>1</sup>H NMR (300 MHz, CDCl<sub>3</sub>)

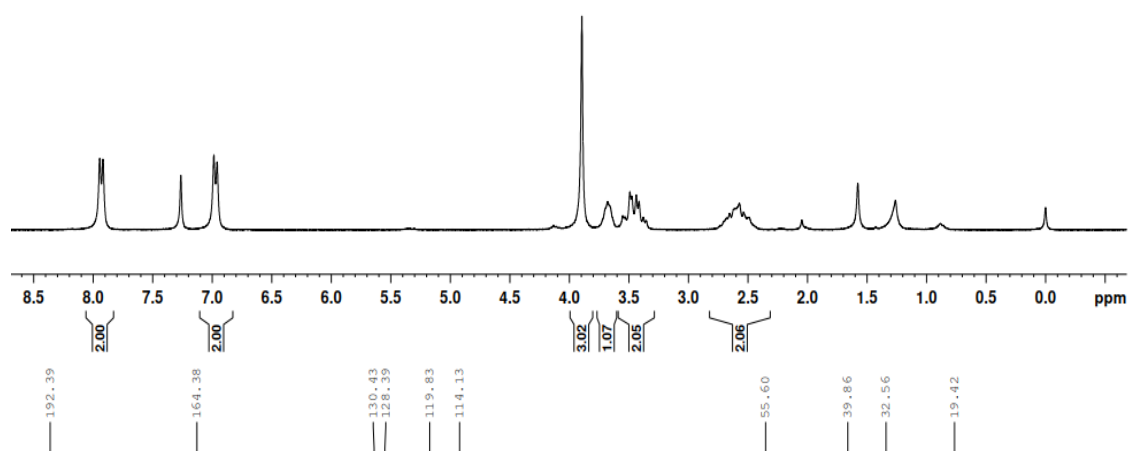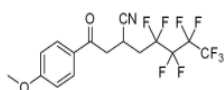

**6c** <sup>13</sup>C NMR (75 MHz, CDCl<sub>3</sub>)

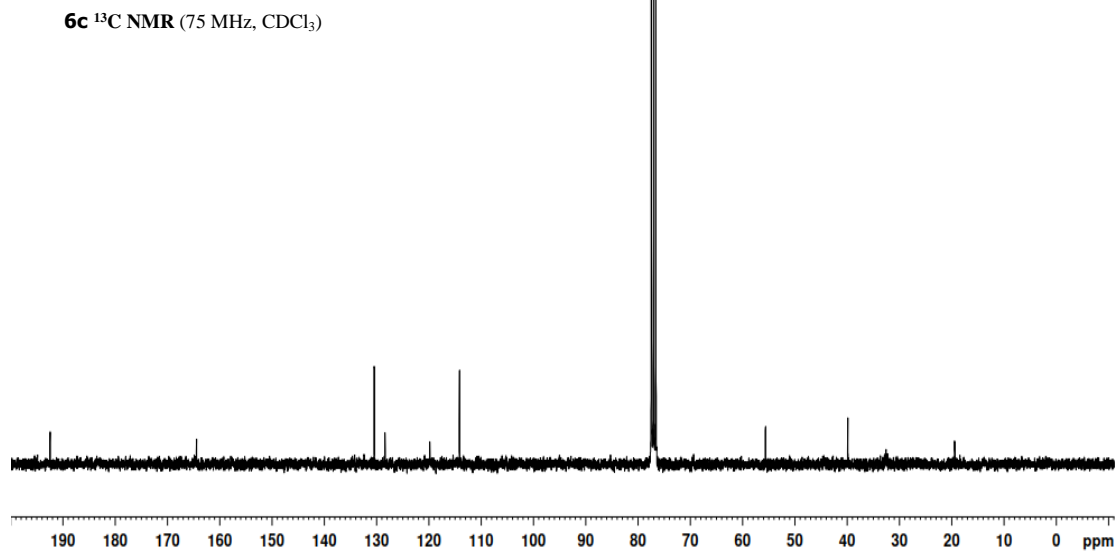

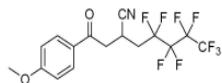

**6c**  $^{19}\text{F}$  NMR (282 MHz,  $\text{CDCl}_3$ )

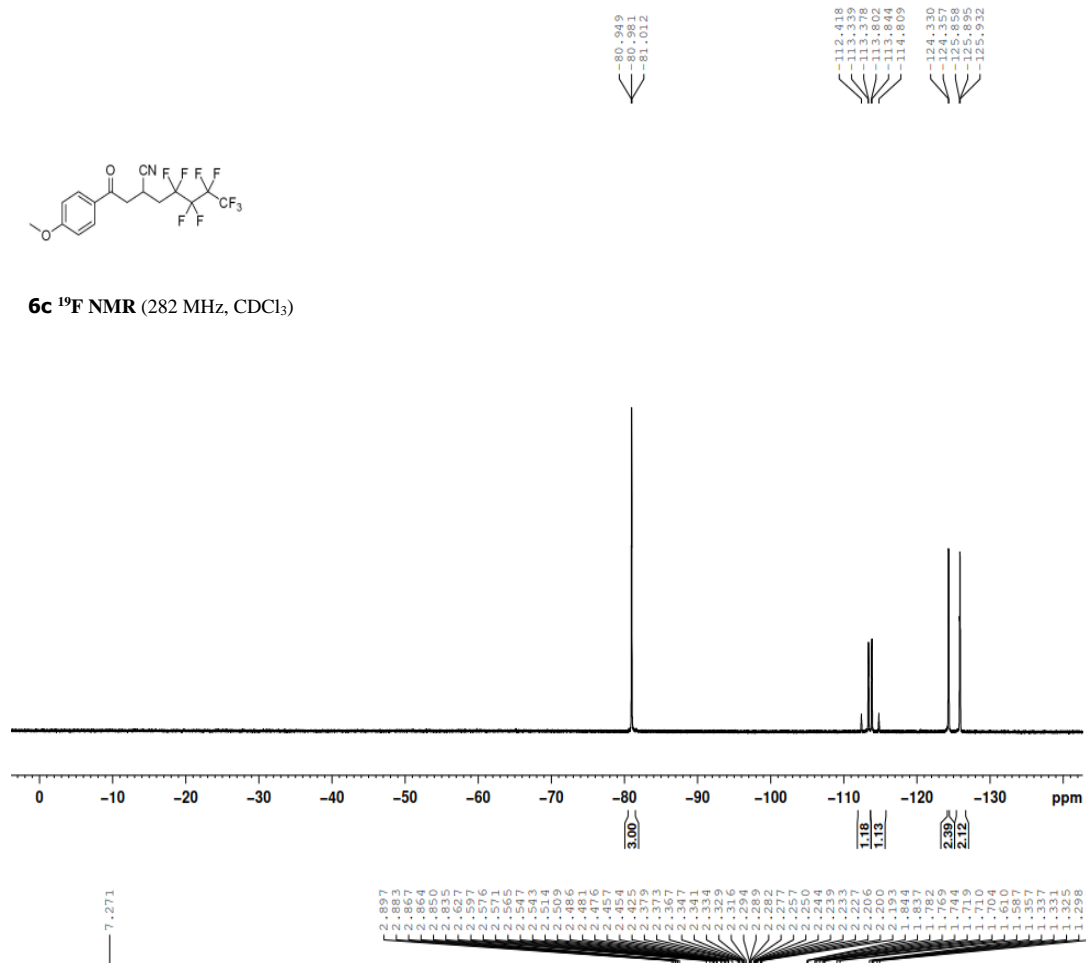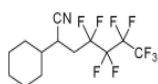

**6d**  $^1\text{H}$  NMR (300 MHz,  $\text{CDCl}_3$ )

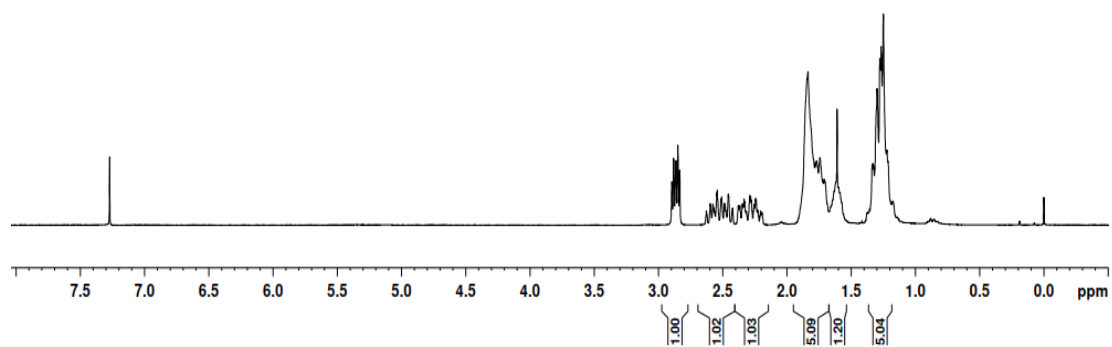

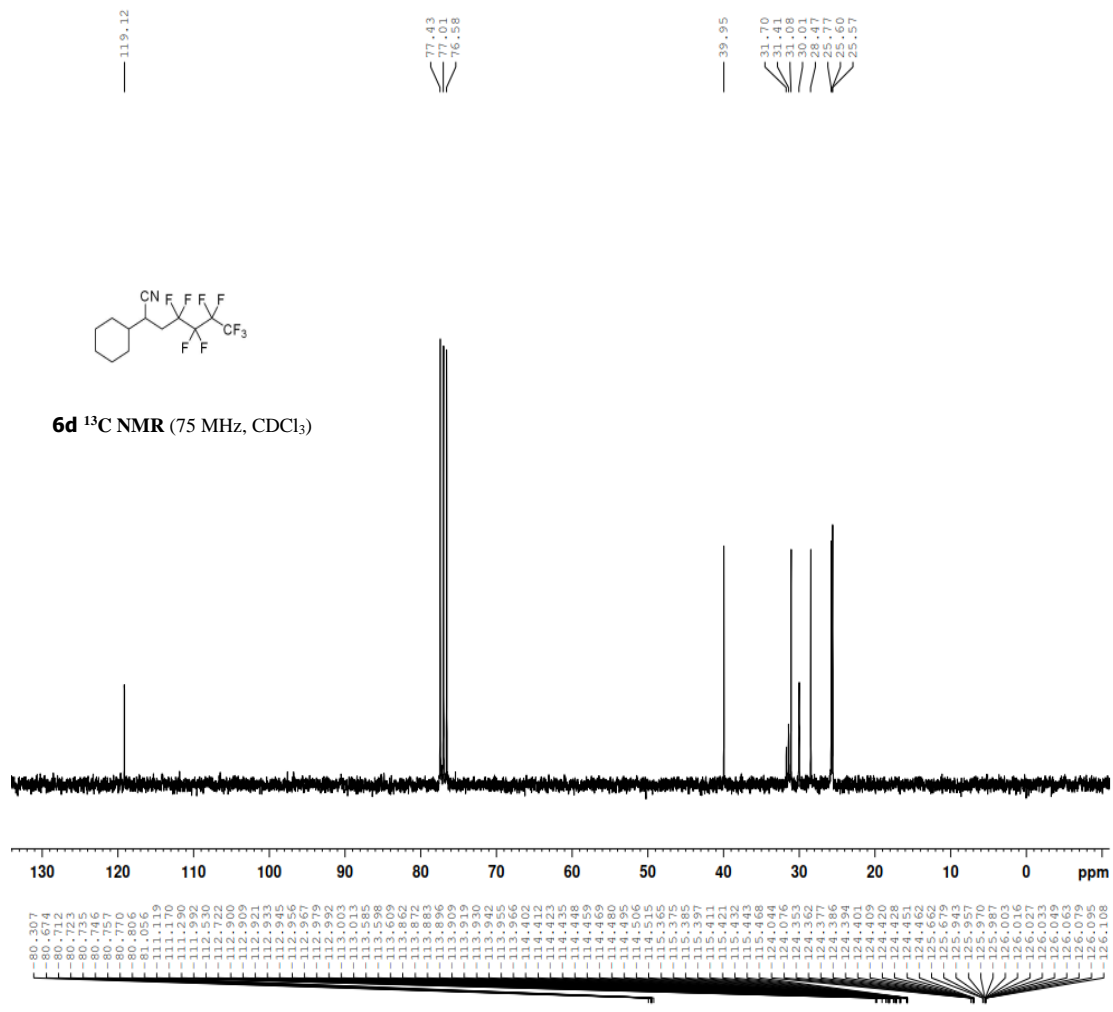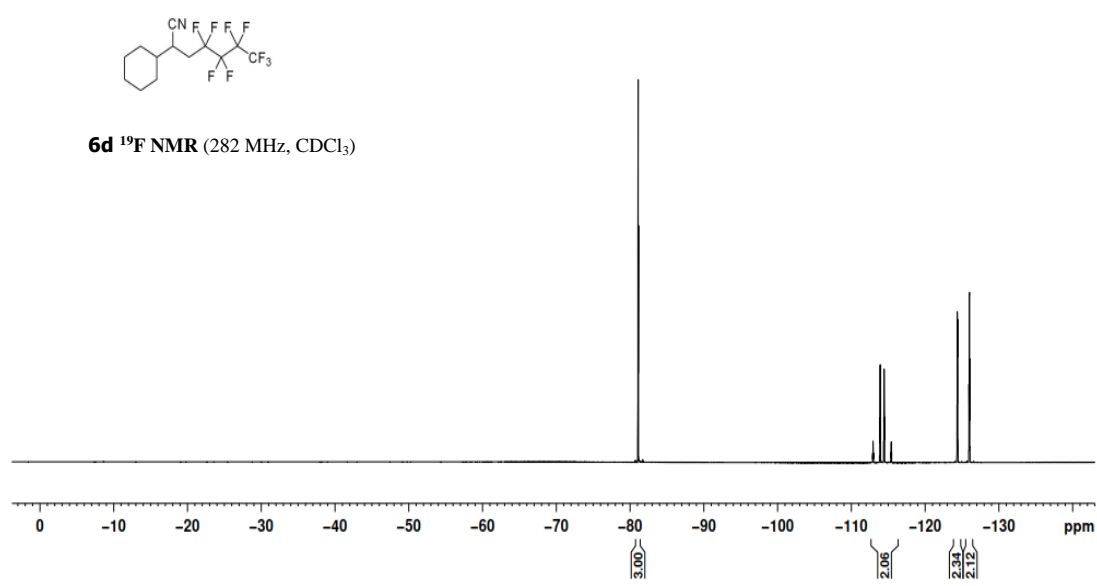



7.990  
7.990  
7.912  
7.912  
7.902  
7.809  
7.798  
7.790  
7.790  
7.273

4.181  
4.181  
4.155  
4.155  
3.992  
3.992  
3.946  
3.923  
3.923  
3.627  
3.601  
3.596  
3.587  
3.580  
3.522  
3.522  
3.523  
3.523  
2.767  
2.767  
2.699  
2.699  
2.685  
2.685  
2.660  
2.660  
2.593  
2.593  
2.599  
2.599  
2.535  
2.535  
2.521  
2.521  
2.483  
2.483  
2.474  
2.474  
2.452  
2.452  
2.439  
2.439  
2.397  
2.397

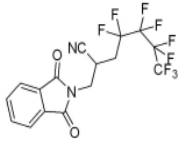

**6e**  $^1\text{H}$  NMR (300 MHz,  $\text{CDCl}_3$ )

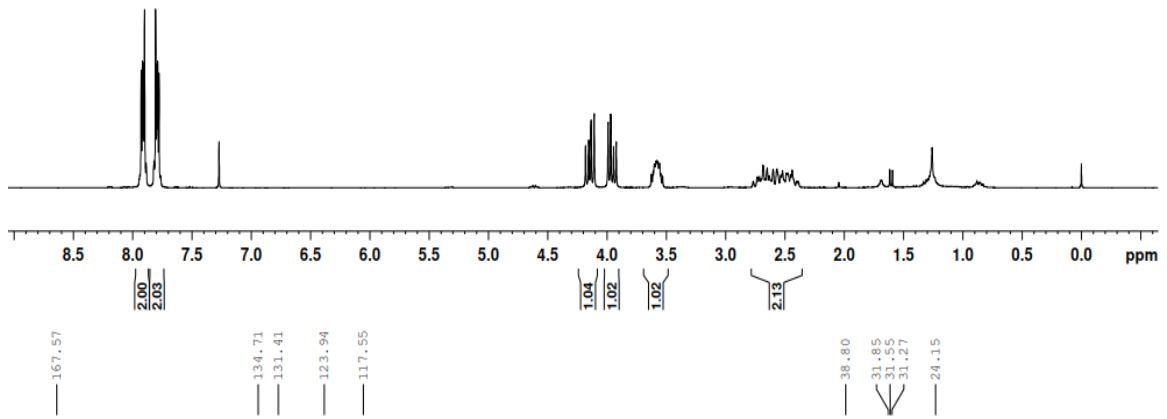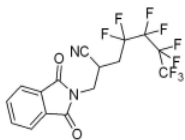

**6e**  $^{13}\text{C}$  NMR (75 MHz,  $\text{CDCl}_3$ )

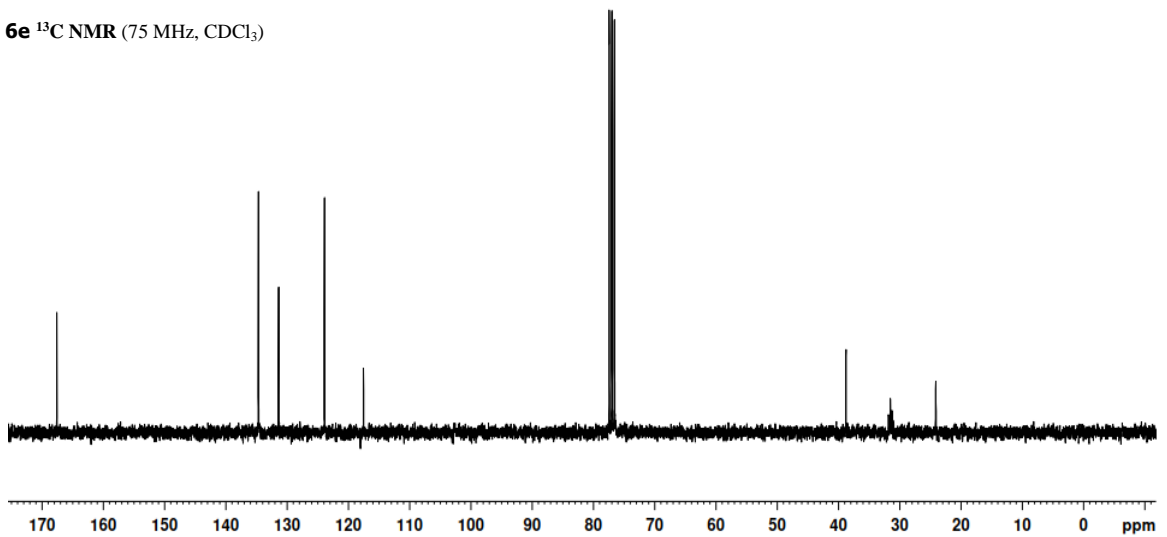

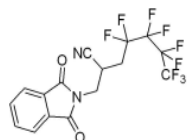

**6e**  $^{19}\text{F}$  NMR (282 MHz,  $\text{CDCl}_3$ )

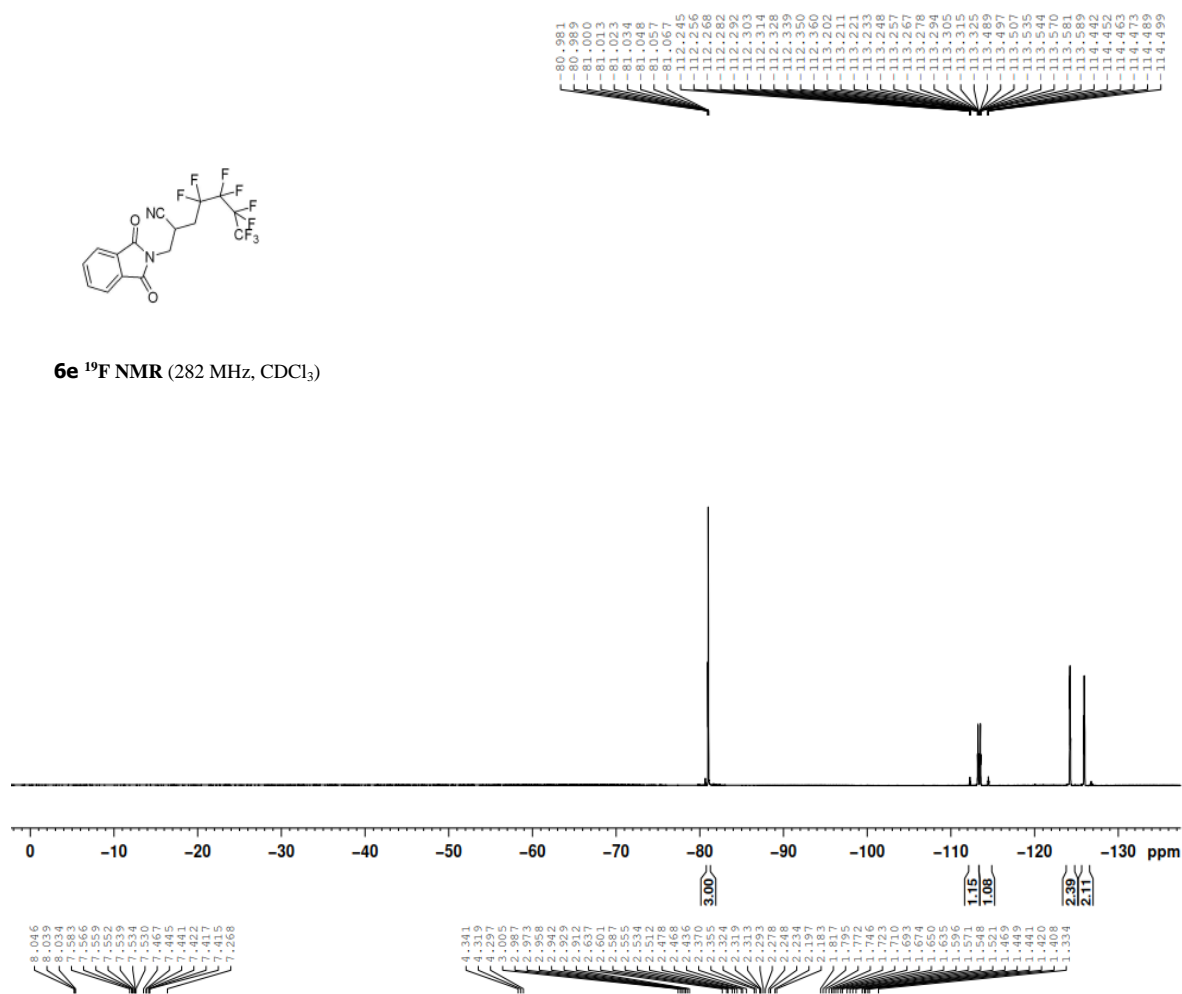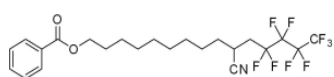

**6f**  $^1\text{H}$  NMR (300 MHz,  $\text{CDCl}_3$ )

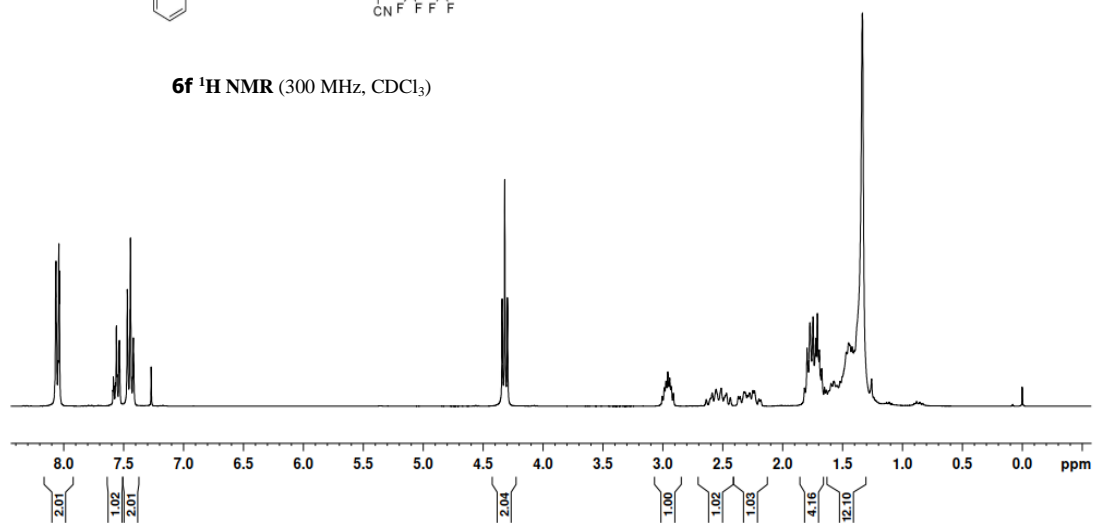



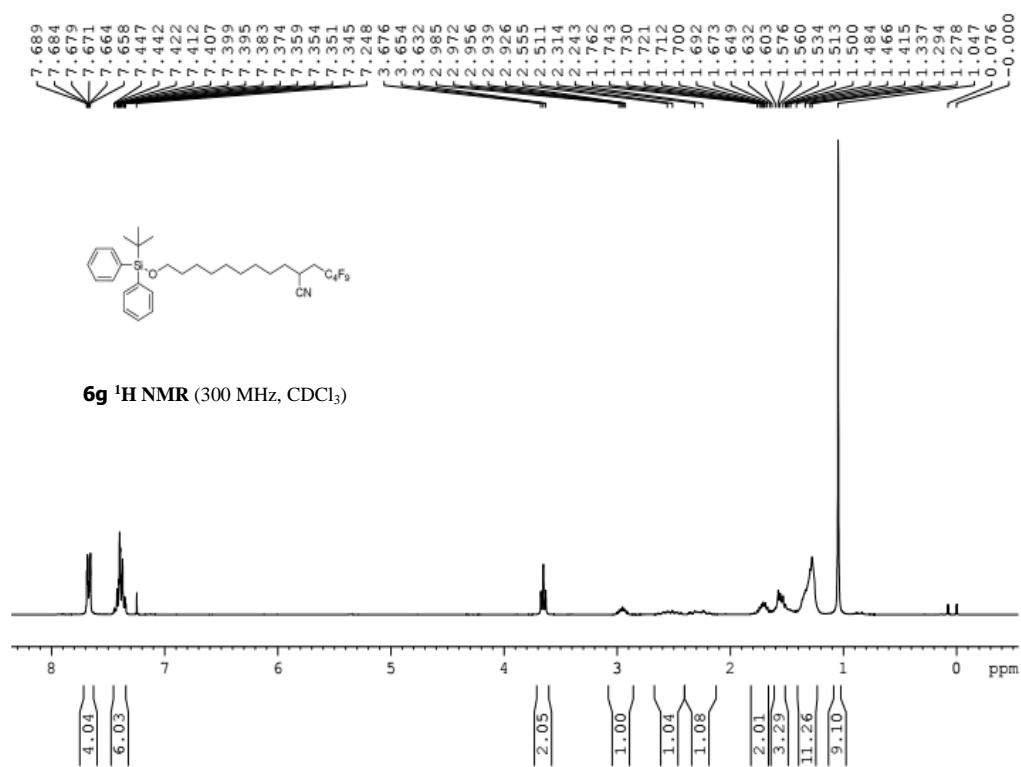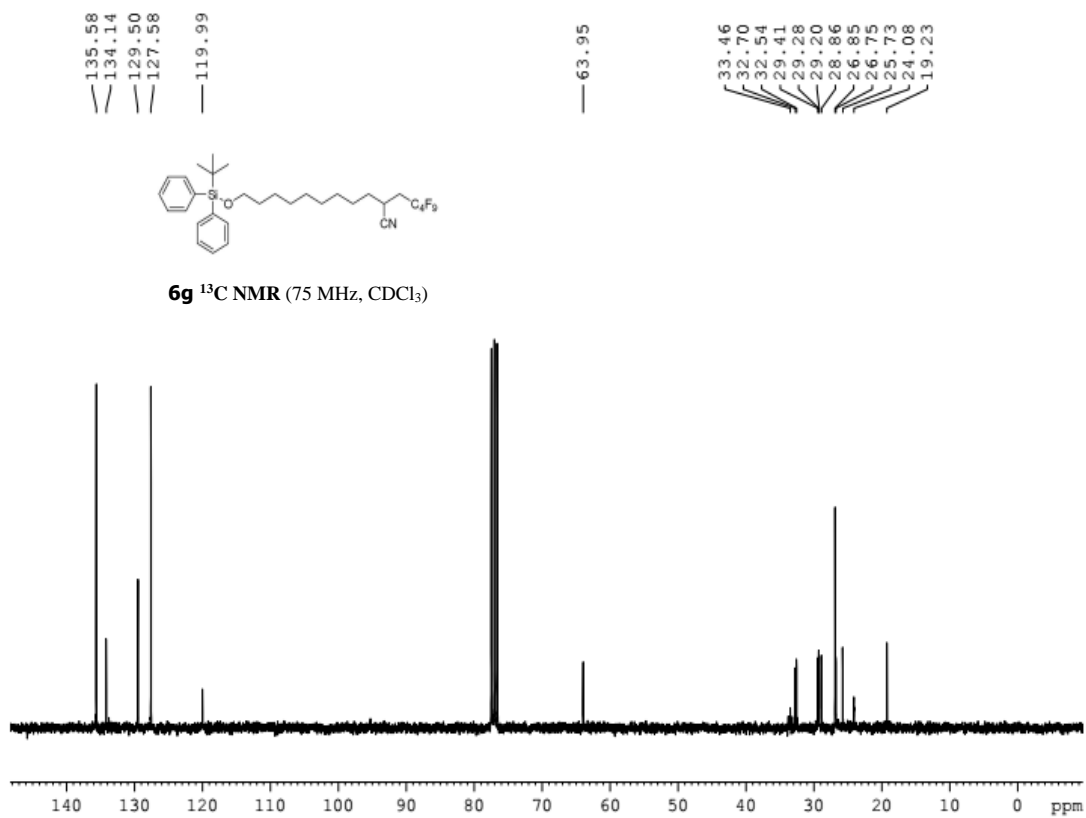

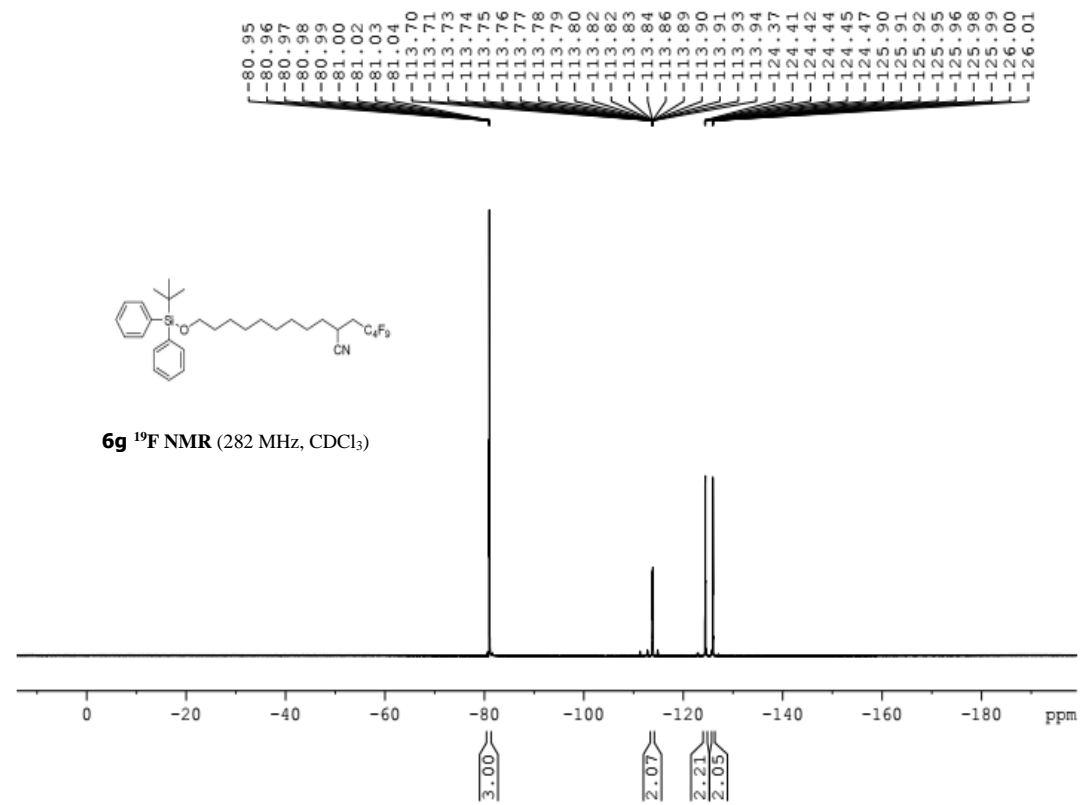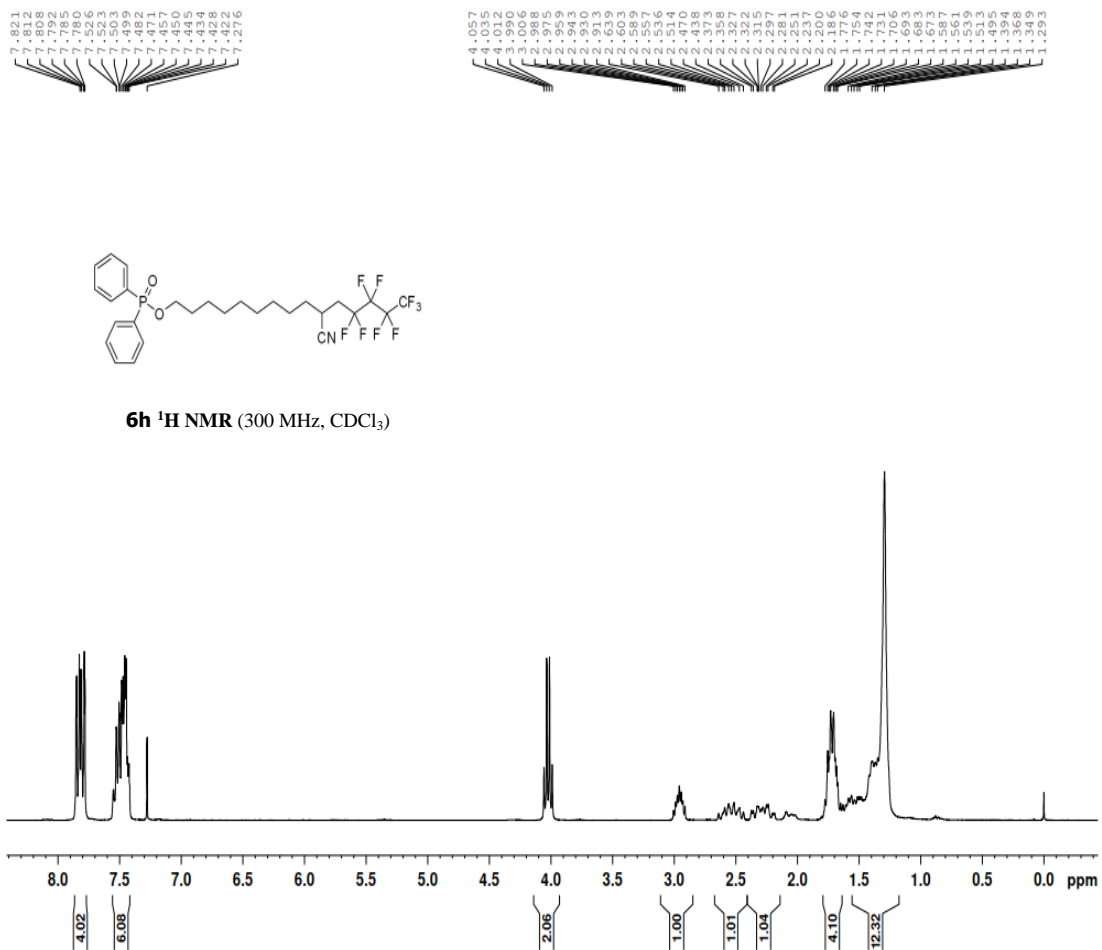

132.52  
132.11  
131.68  
131.55  
130.70  
128.60  
125.42  
119.97

64.99  
64.91

33.43  
33.14  
32.65  
30.56  
29.45  
29.13  
28.52  
26.70  
25.54  
24.06

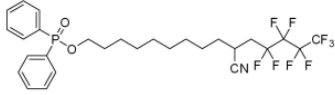

**6h**  $^{13}\text{C}$  NMR (75 MHz,  $\text{CDCl}_3$ )

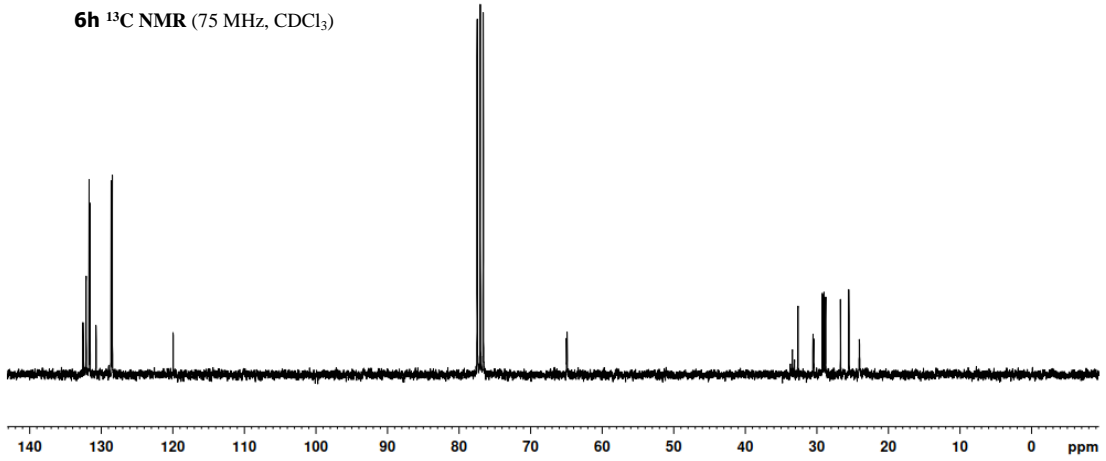

-80.978  
-80.964  
-81.019  
-81.029  
-81.043  
-81.052

-113.696  
-113.706  
-113.717  
-113.737  
-113.751  
-113.760  
-113.772  
-113.784  
-113.800  
-113.809  
-113.869  
-113.900  
-113.915  
-113.942  
-113.954  
-124.322  
-124.426  
-124.433  
-124.483  
-124.493  
-125.930  
-125.940  
-125.977  
-126.022  
-126.029

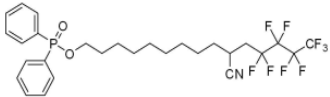

**6h**  $^{19}\text{F}$  NMR (282 MHz,  $\text{CDCl}_3$ )

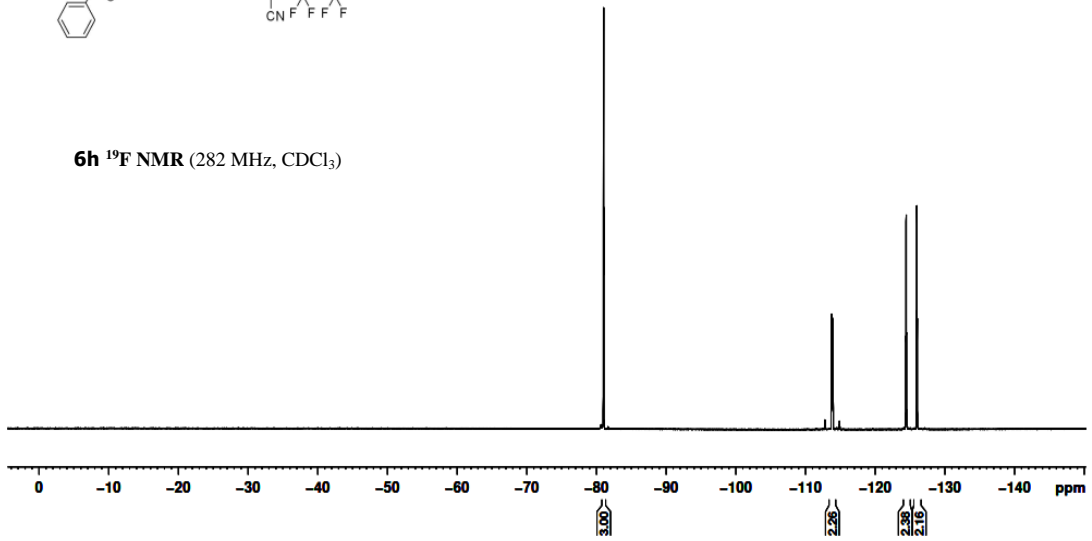

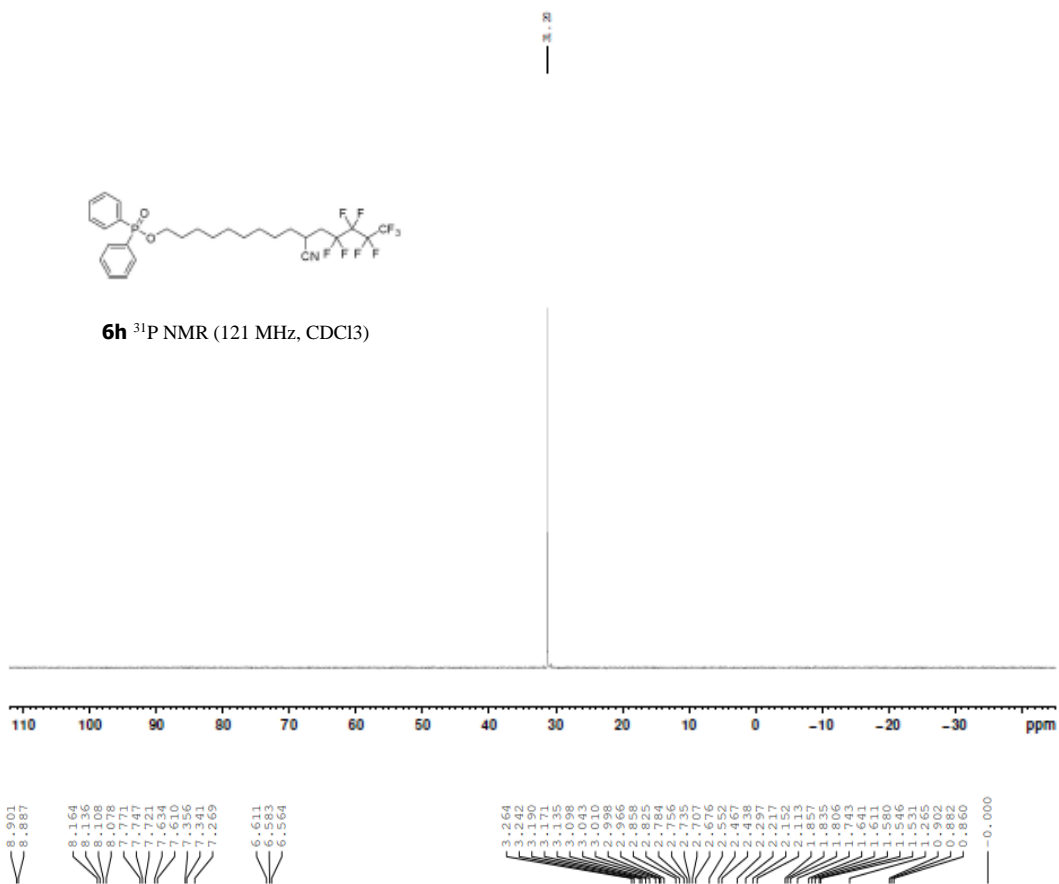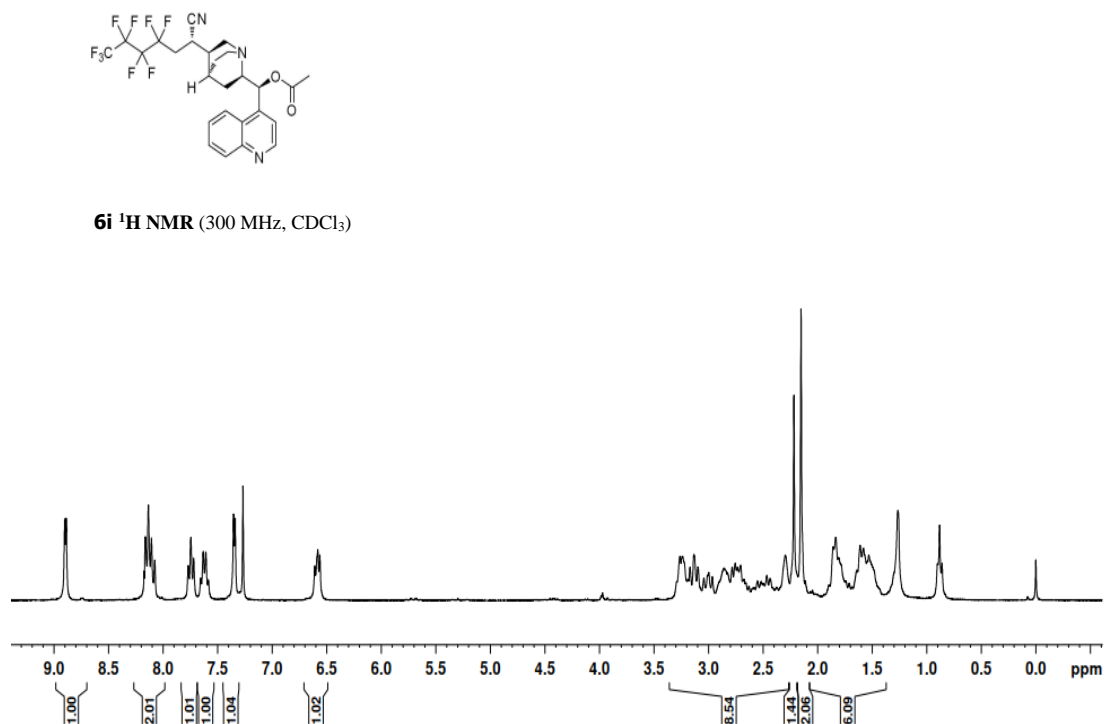

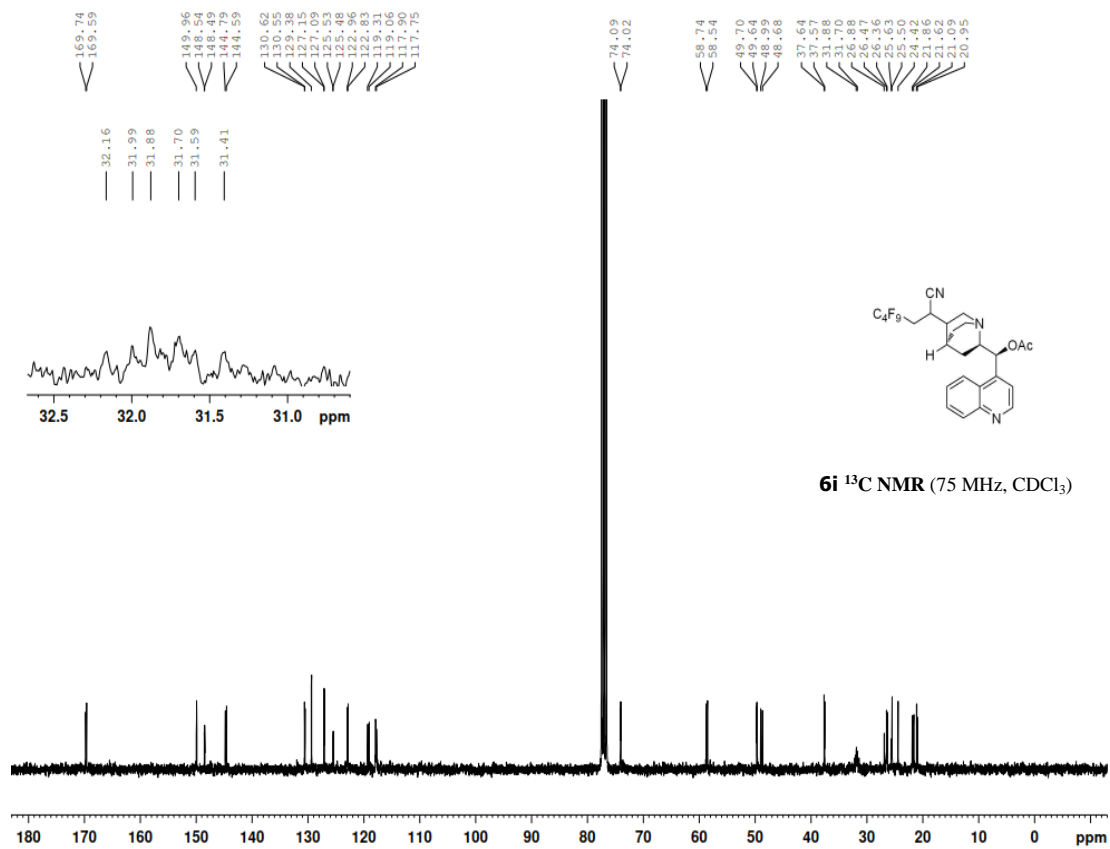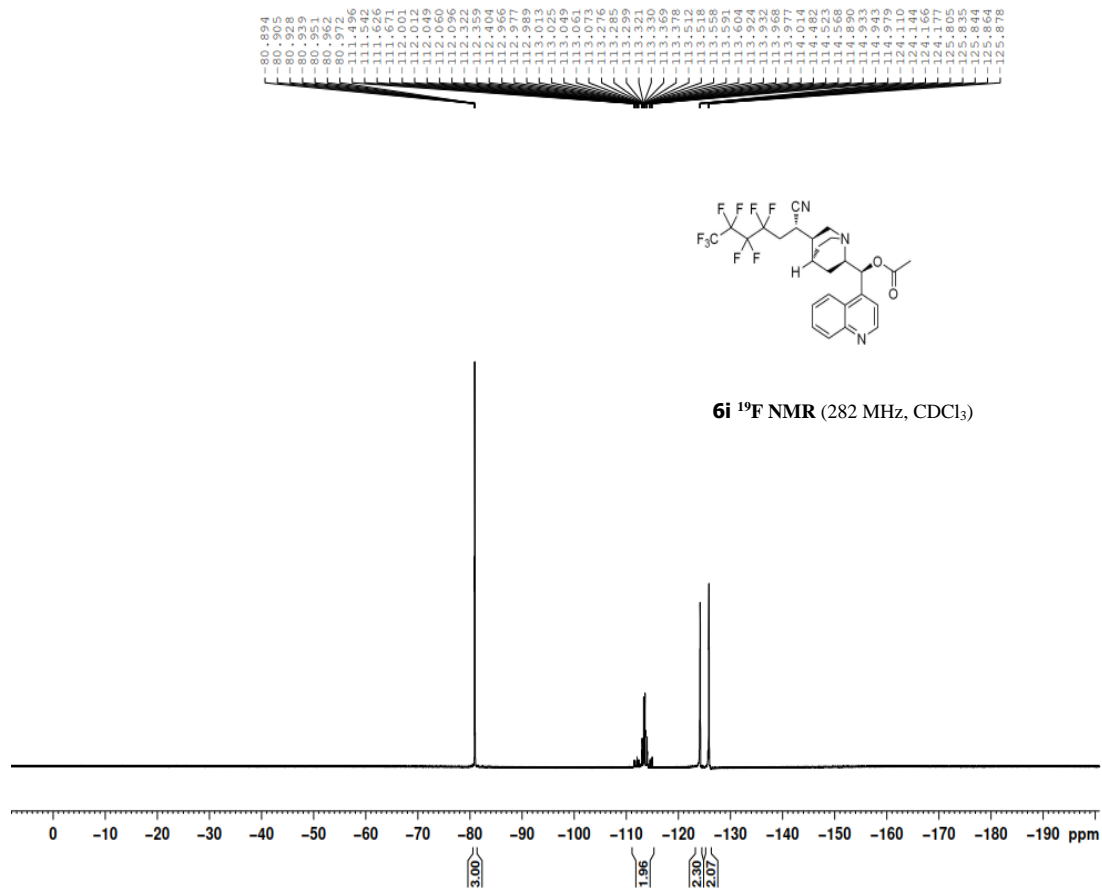



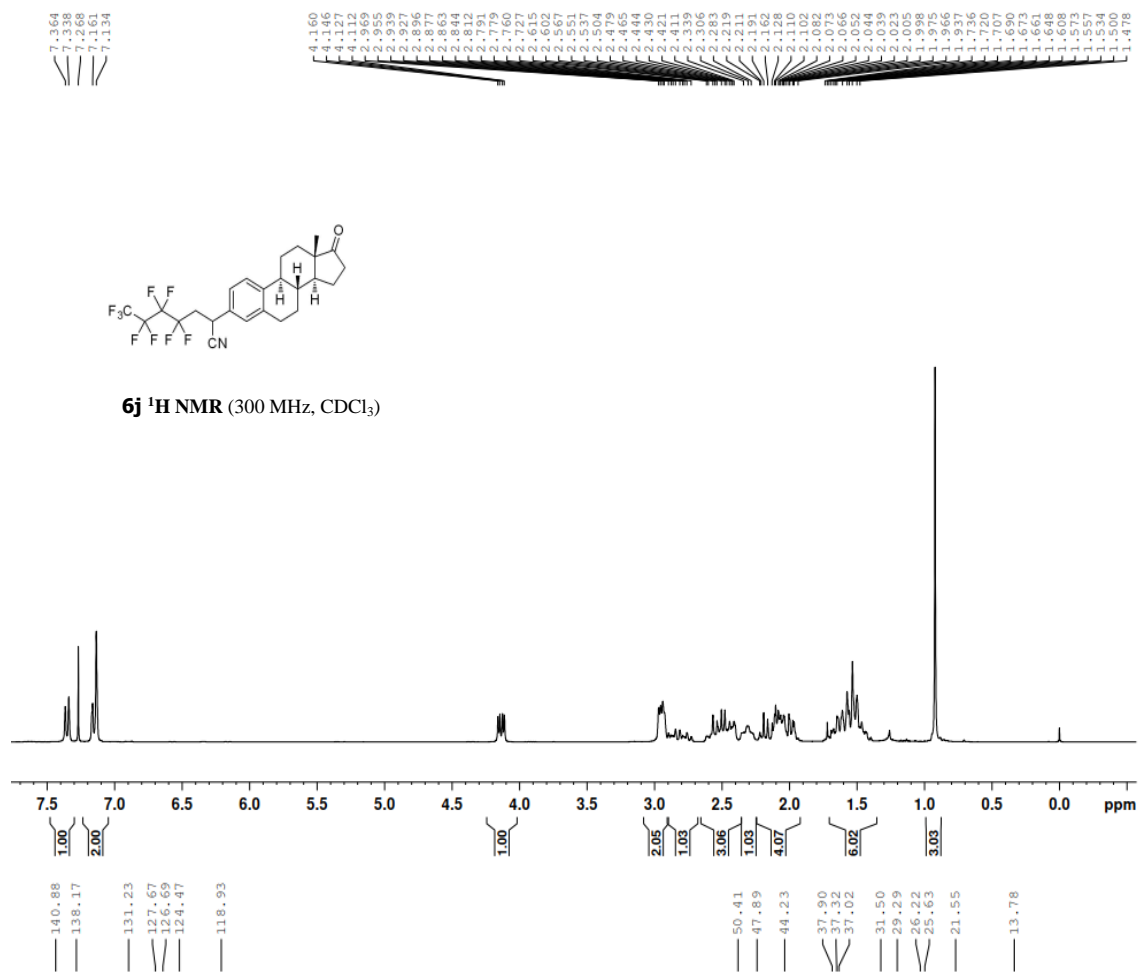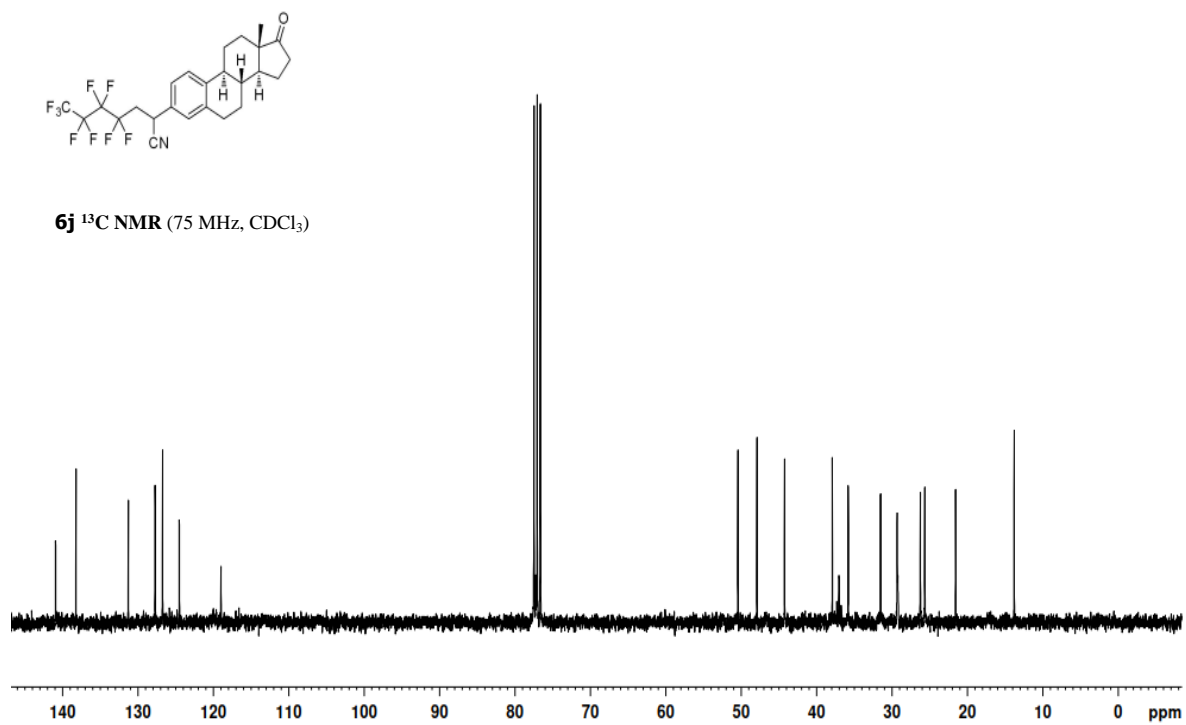

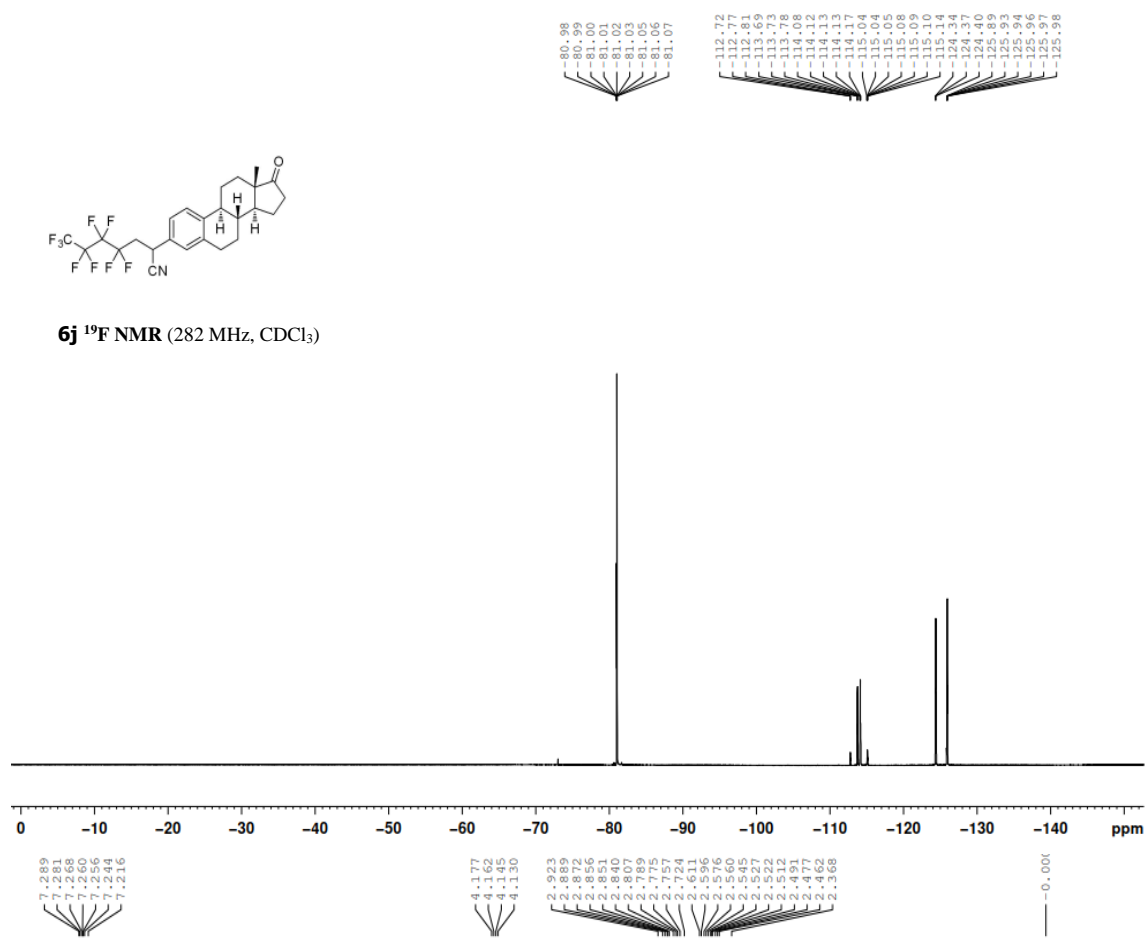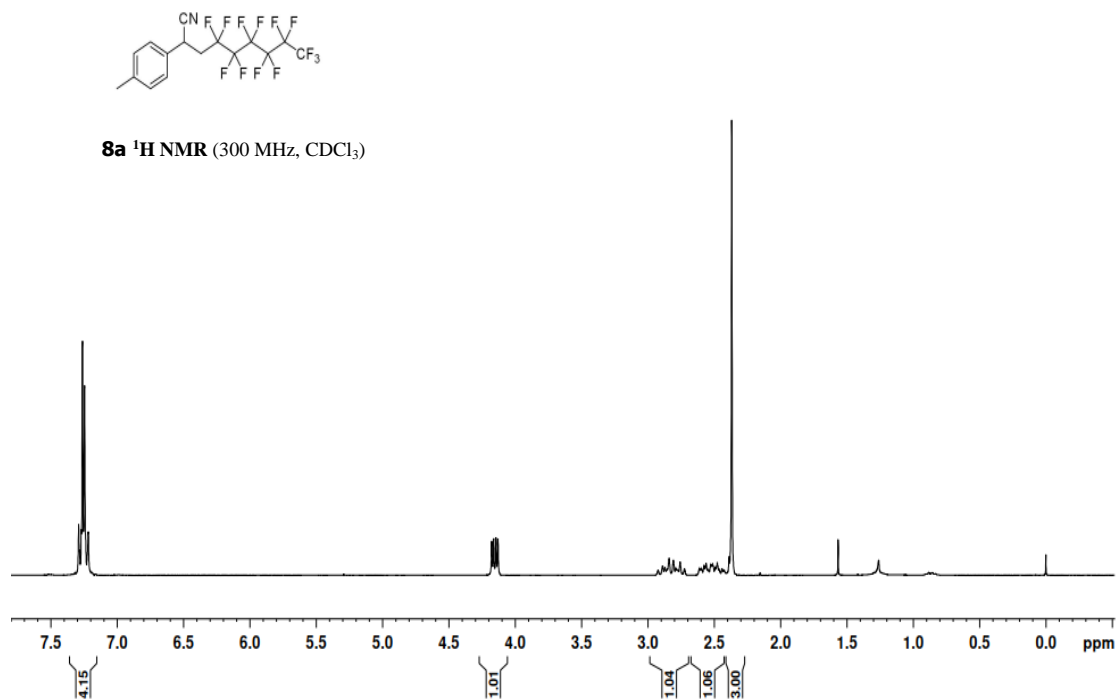

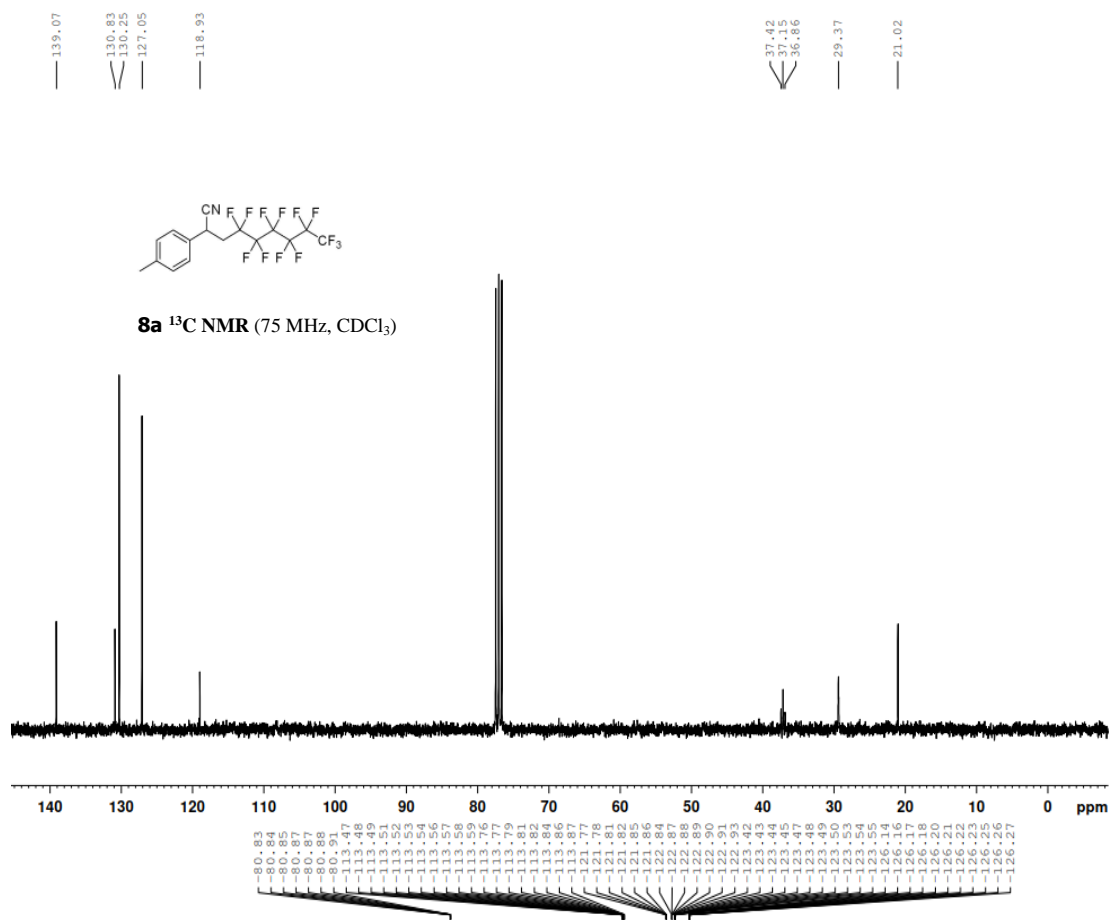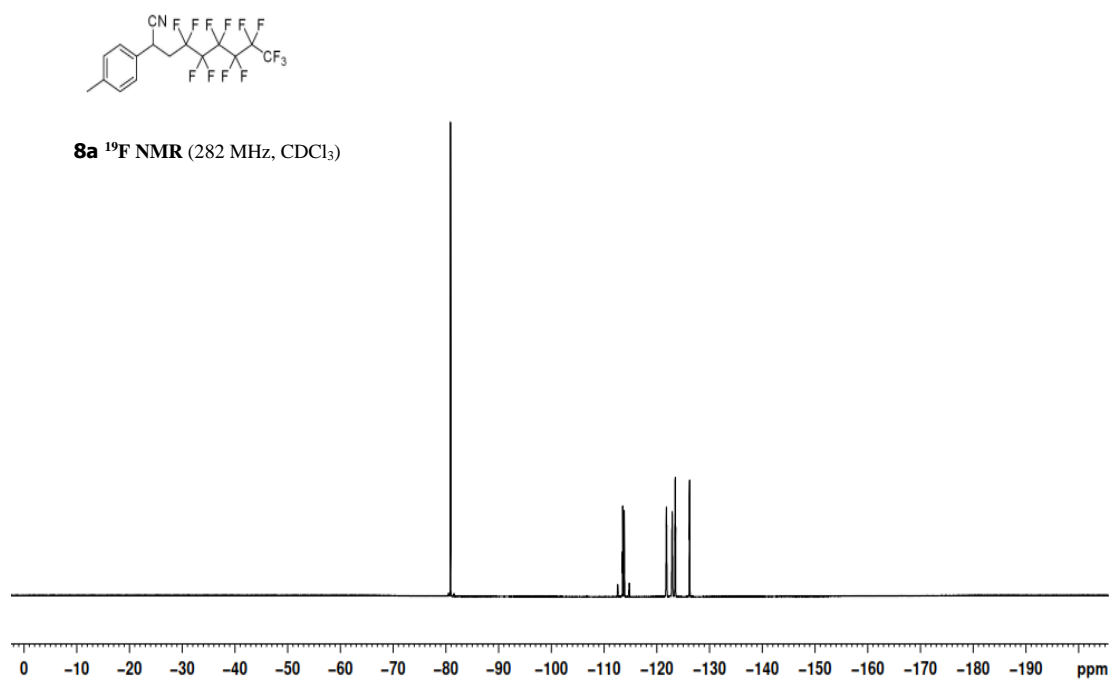

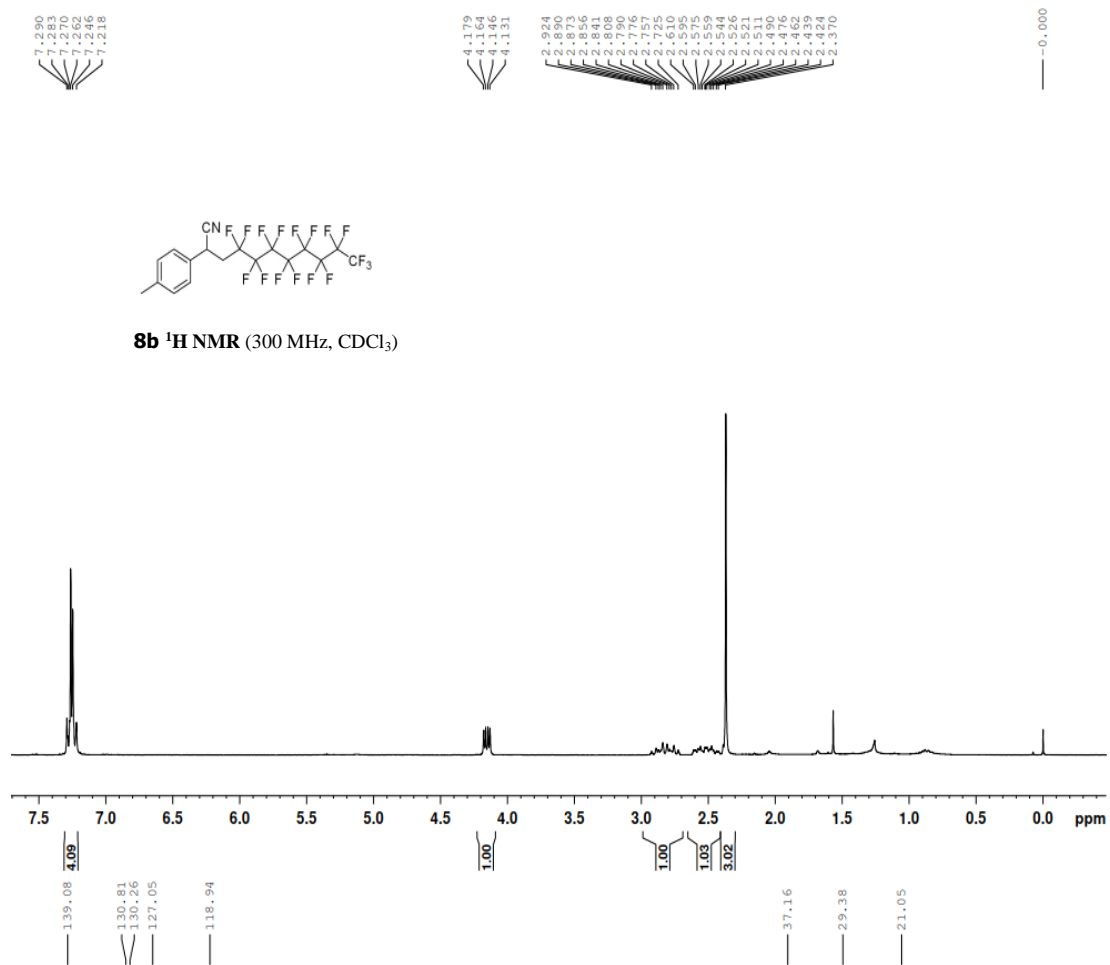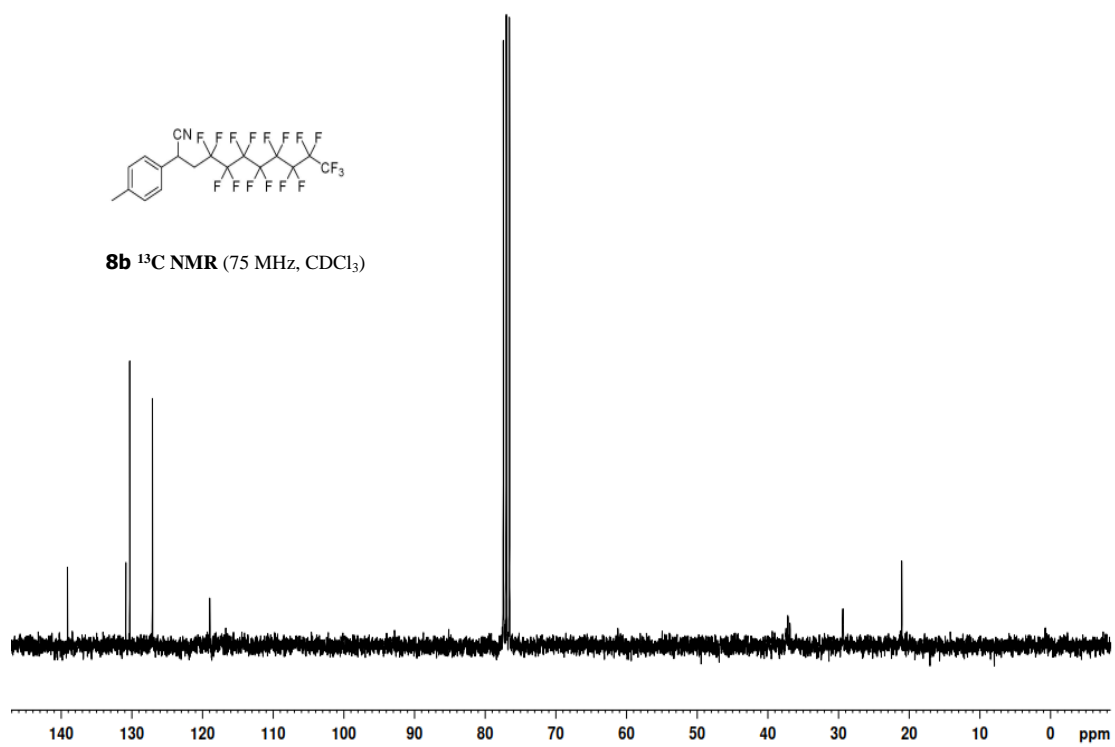



139.04  
128.83  
128.35  
126.78  
119.63

34.76  
33.79  
33.49  
33.19  
32.81  
23.55

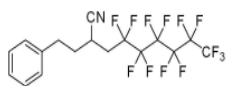

**8c**  $^{13}\text{C}$  NMR (75 MHz,  $\text{CDCl}_3$ )

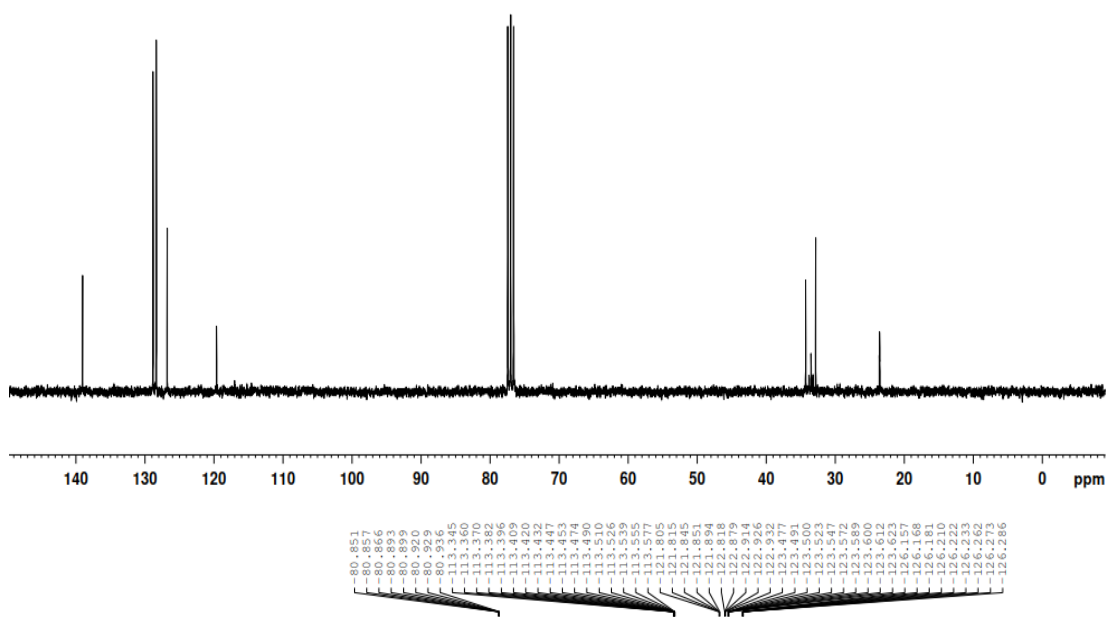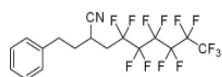

**8c**  $^{19}\text{F}$  NMR (282 MHz,  $\text{CDCl}_3$ )

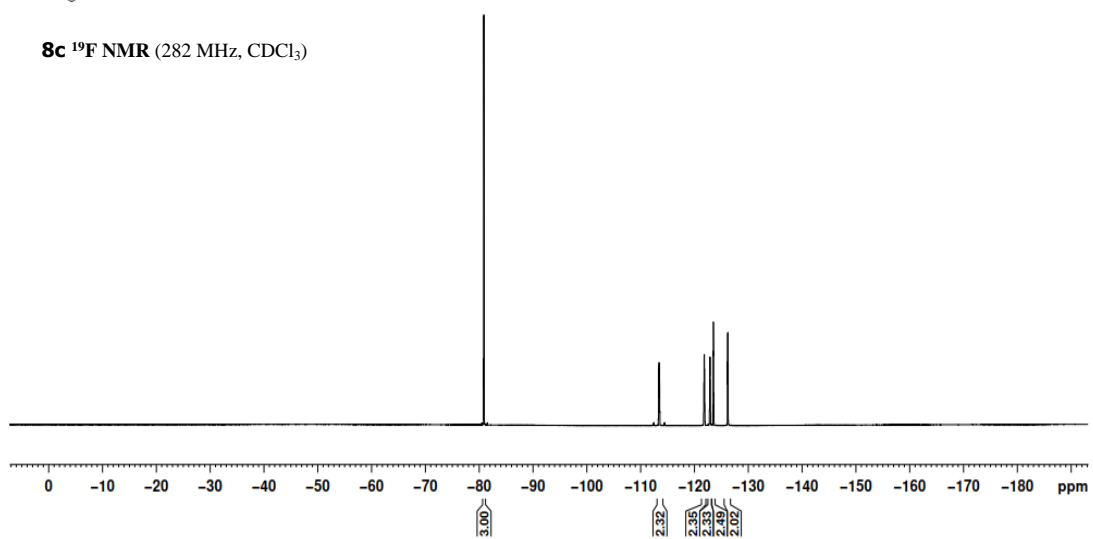

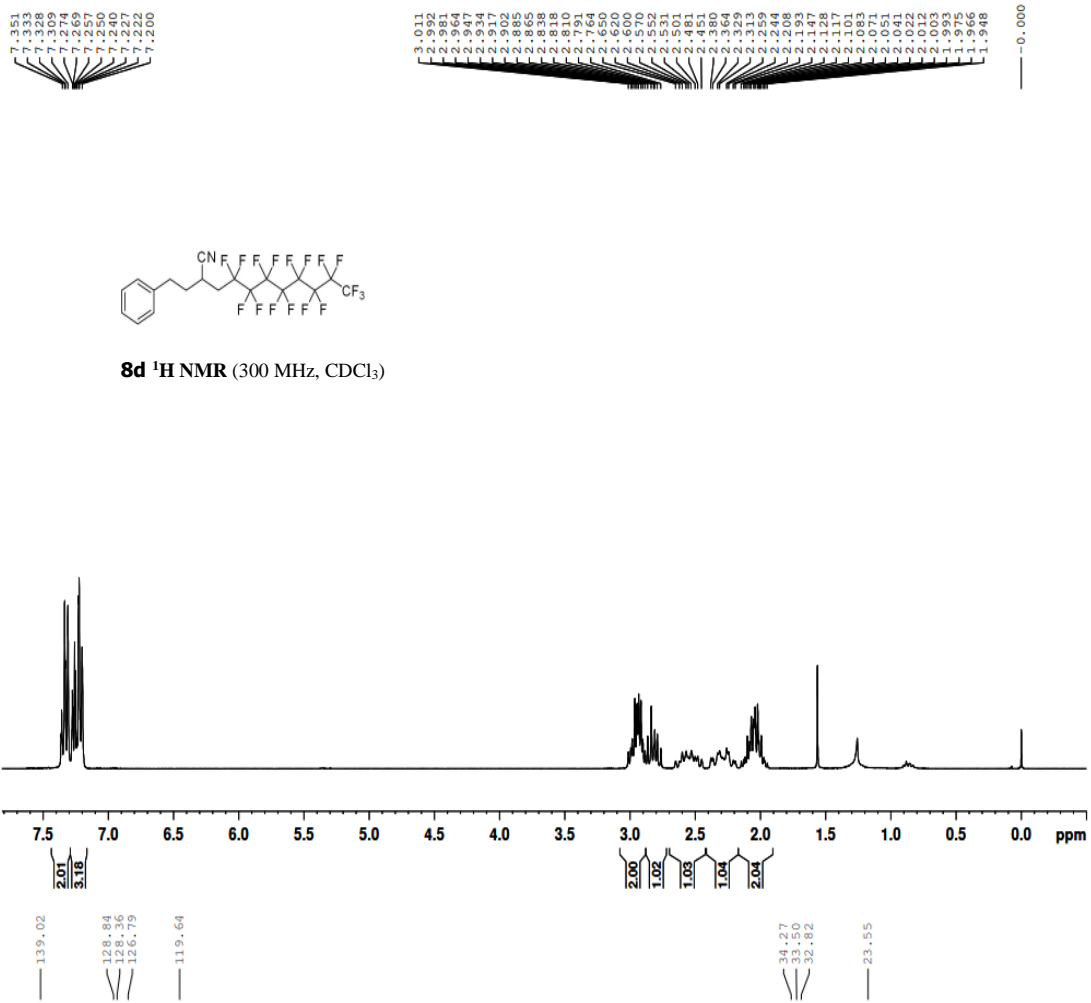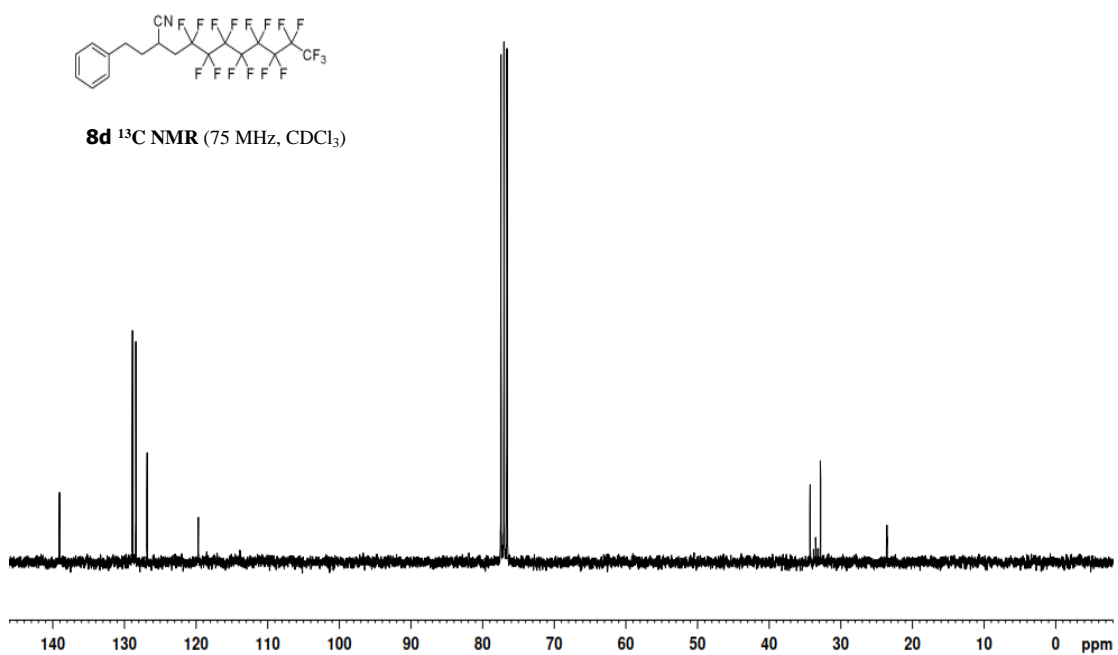





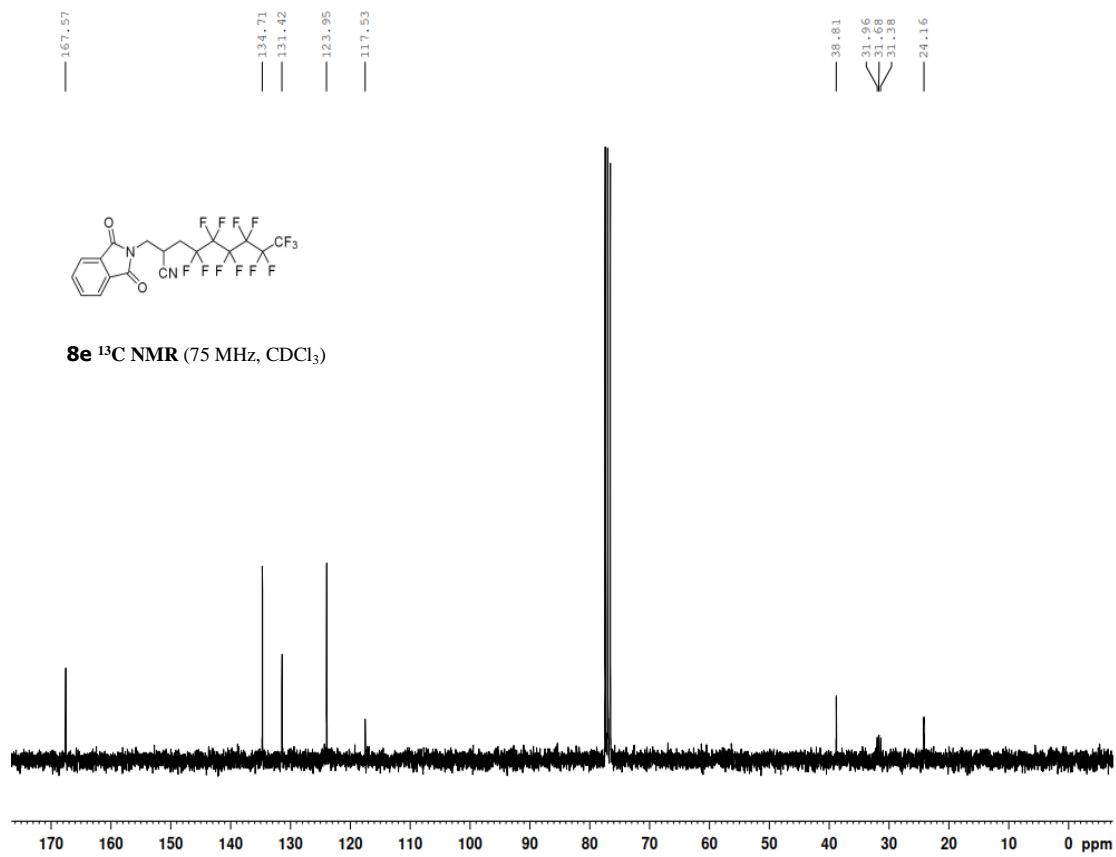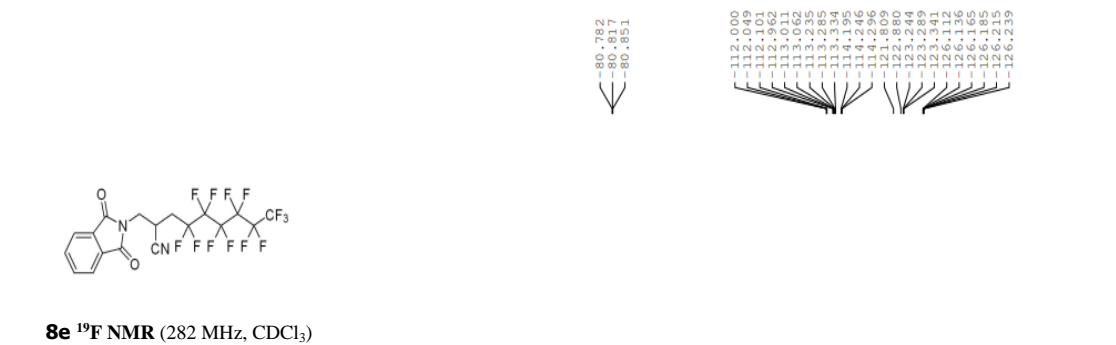

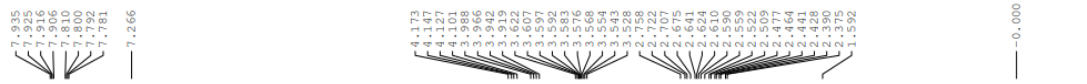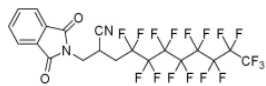

**8f** <sup>1</sup>H NMR (300 MHz, CDCl<sub>3</sub>)

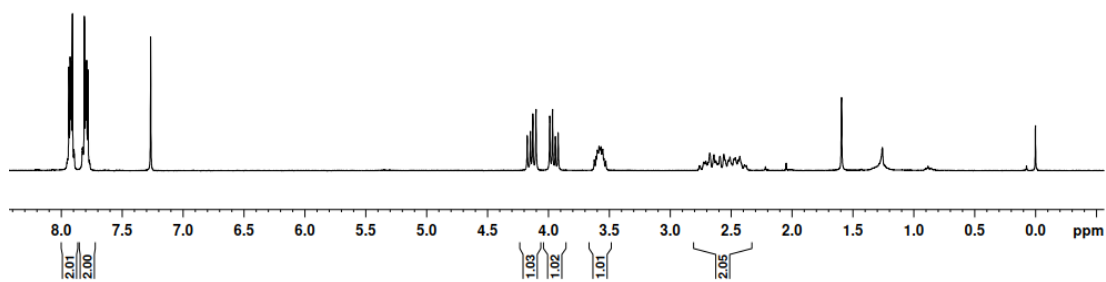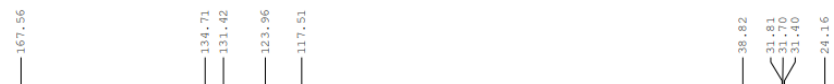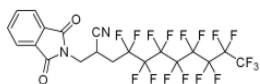

**8f** <sup>13</sup>C NMR (75 MHz, CDCl<sub>3</sub>)

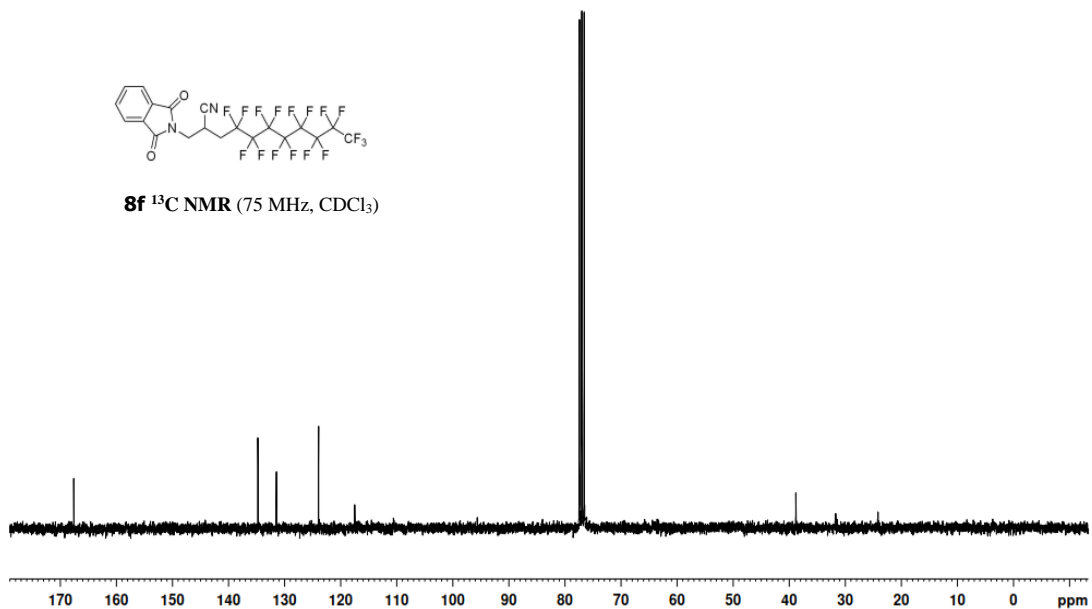

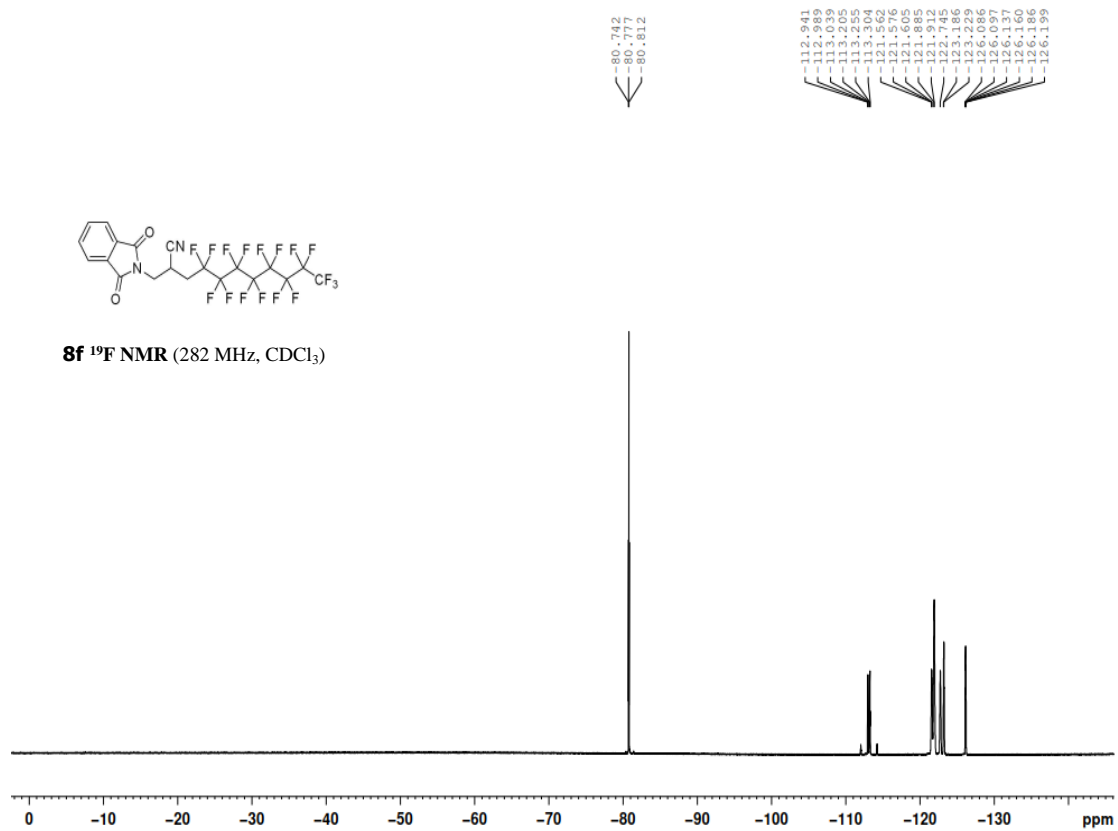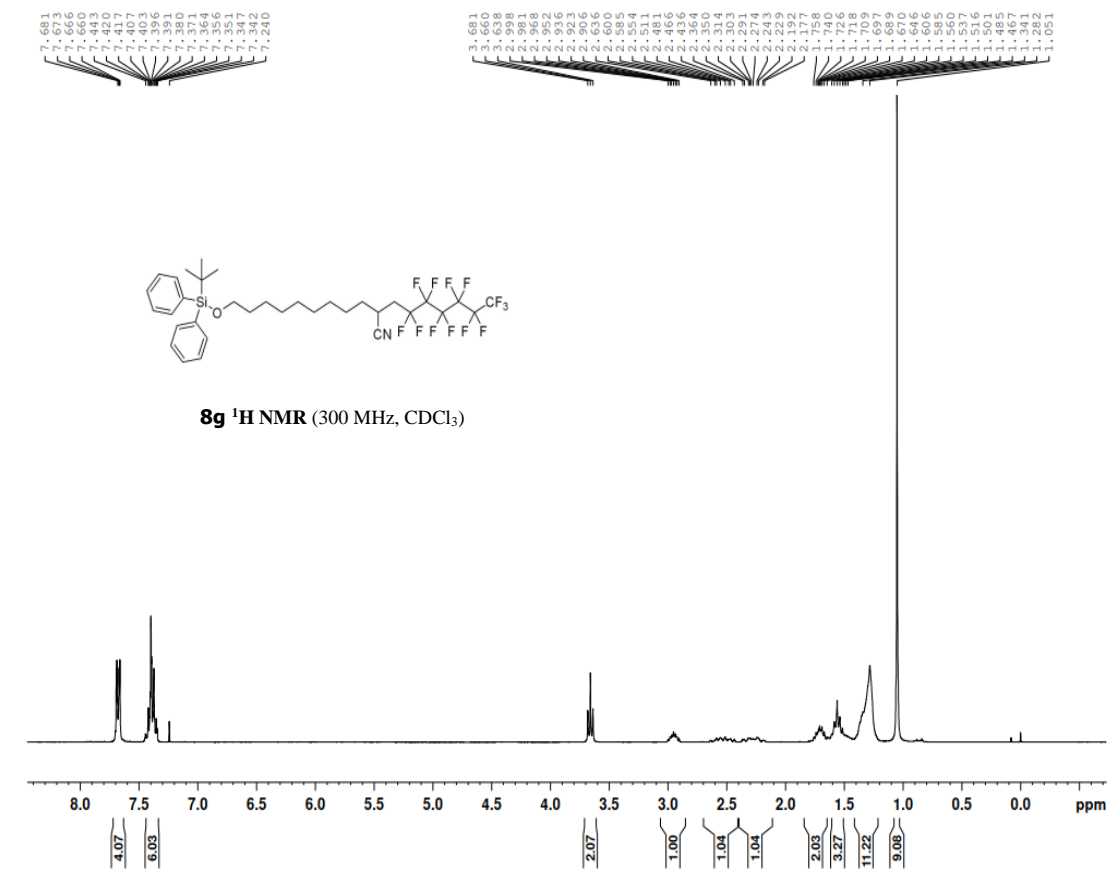

135.59  
134.17  
129.49  
127.56  
119.96

63.96

33.87  
33.58  
33.29  
32.71  
32.51  
29.41  
29.27  
29.19  
28.85  
28.61  
26.75  
25.73  
24.11  
19.22

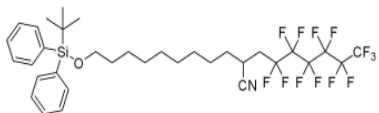

**8g** <sup>13</sup>C NMR (75 MHz, CDCl<sub>3</sub>)

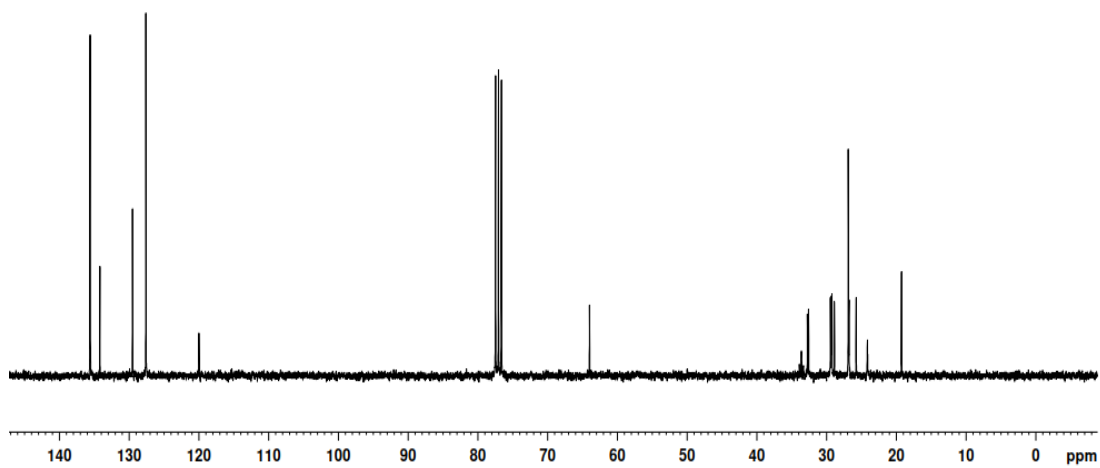

80.797  
80.803  
80.812  
80.839  
80.874  
80.879  
80.881  
113.443  
113.455  
113.478  
113.478  
113.494  
113.499  
113.505  
113.505  
113.564  
113.578  
113.597  
113.603  
113.623  
113.678  
113.687  
113.700  
113.700  
121.823  
121.829  
121.858  
121.875  
122.815  
122.850  
122.885  
122.936  
123.438  
123.438  
123.448  
123.472  
123.537  
123.548

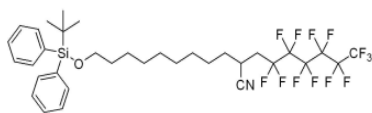

**8g** <sup>19</sup>F NMR (282 MHz, CDCl<sub>3</sub>)

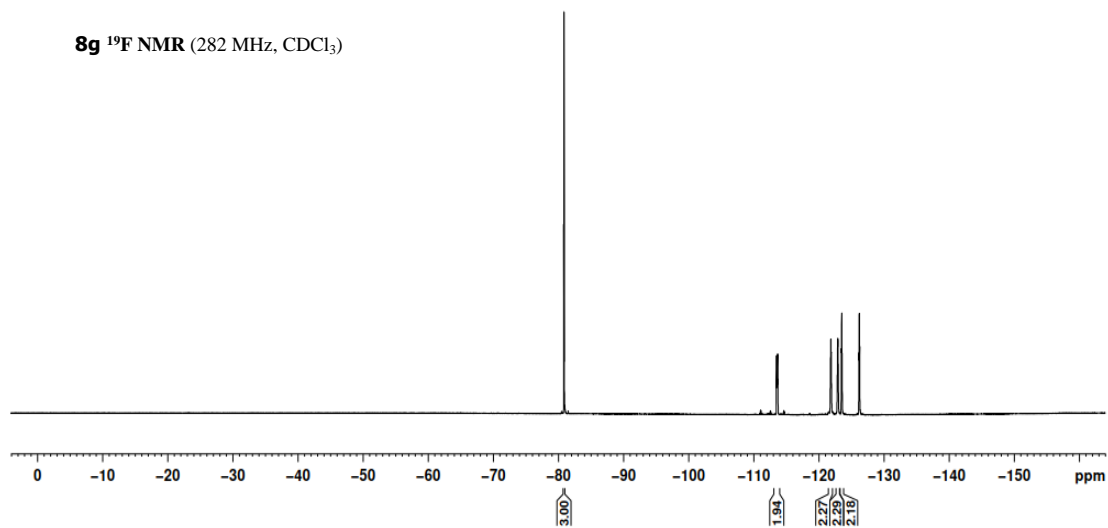

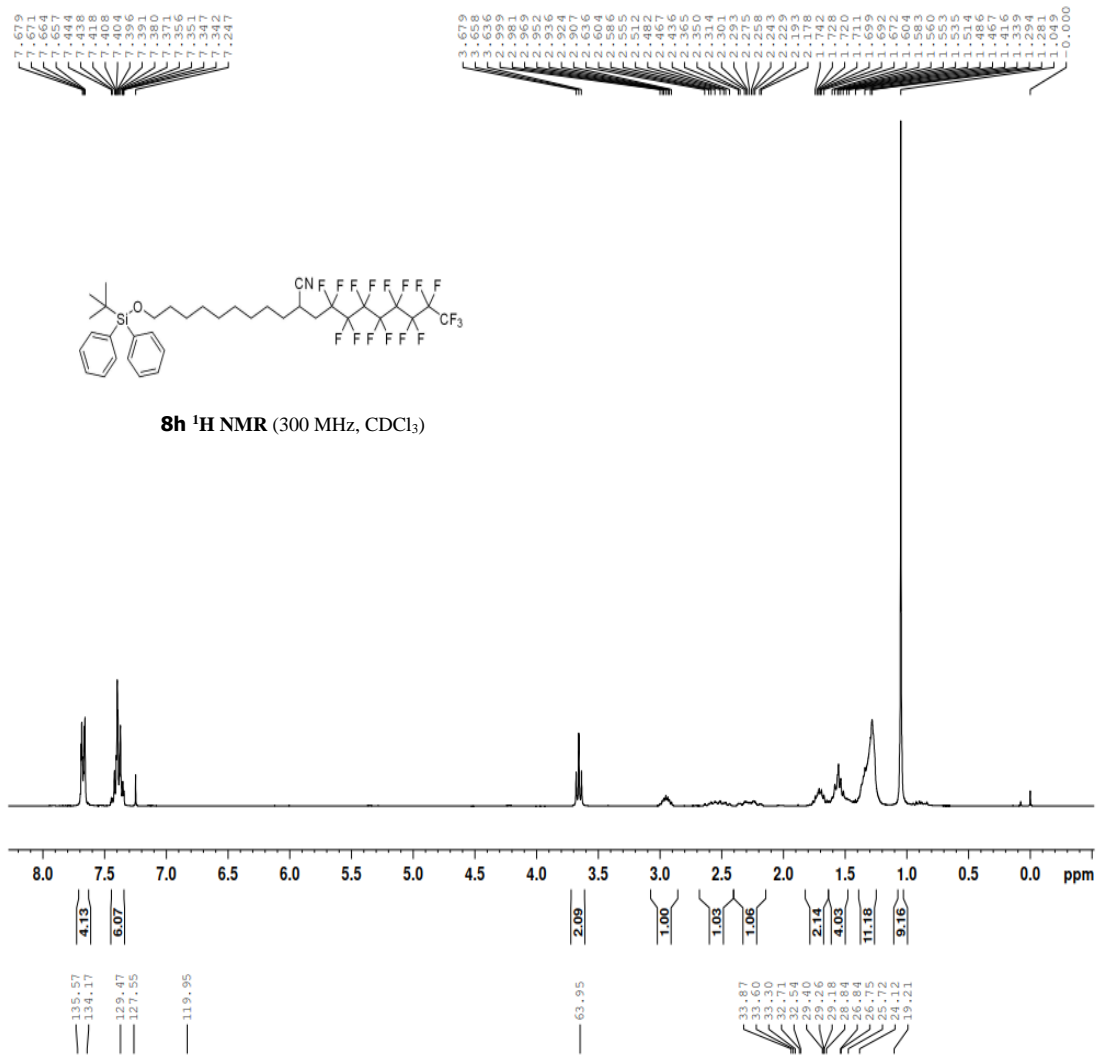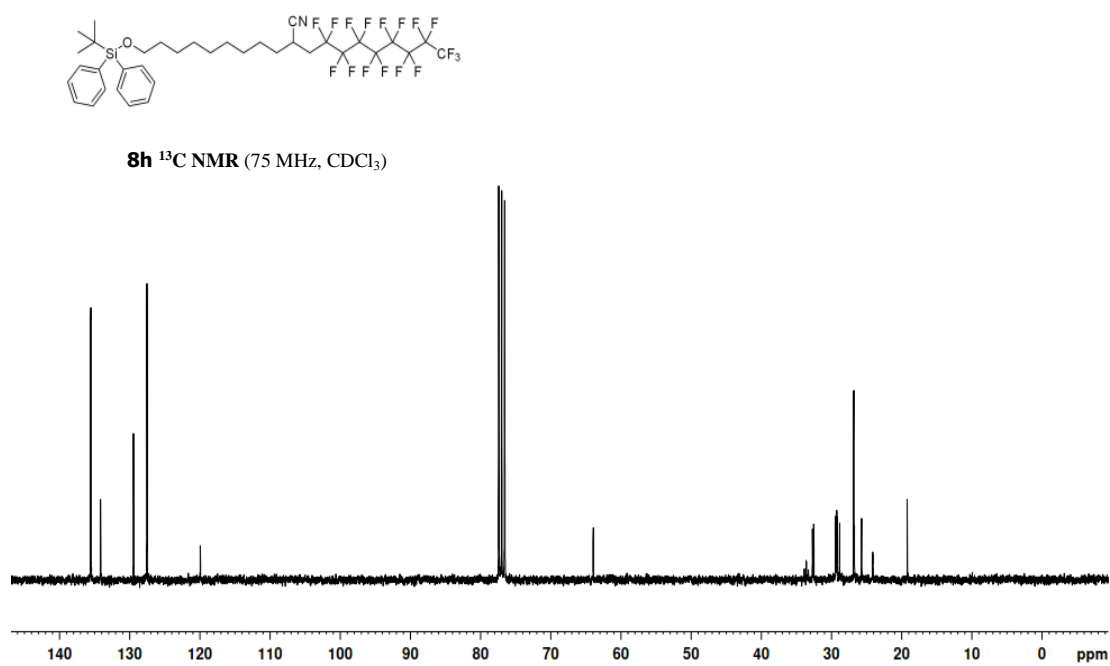



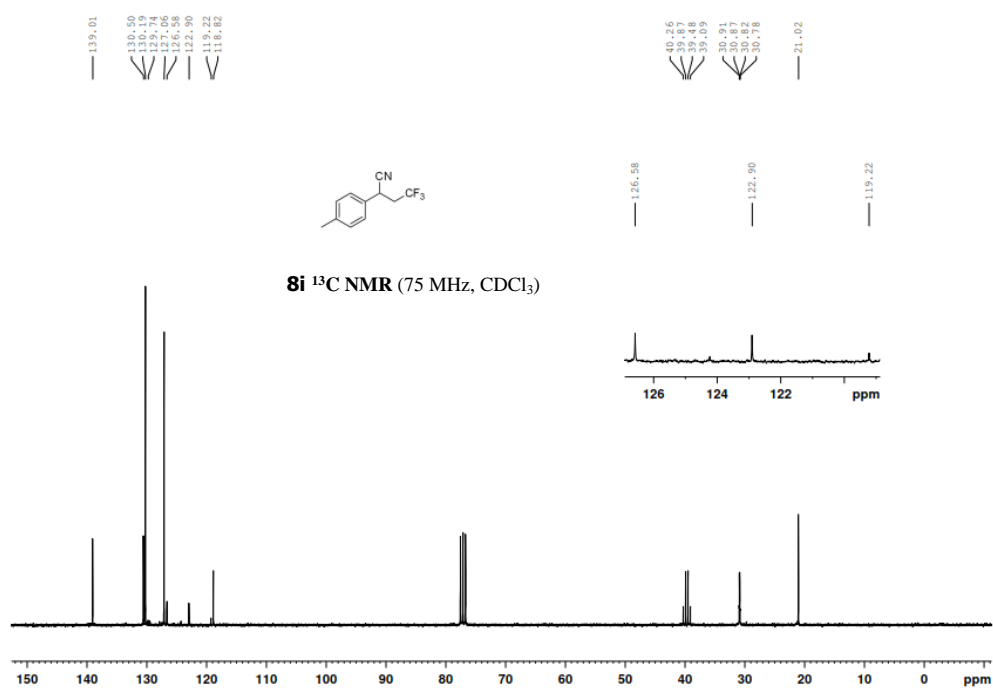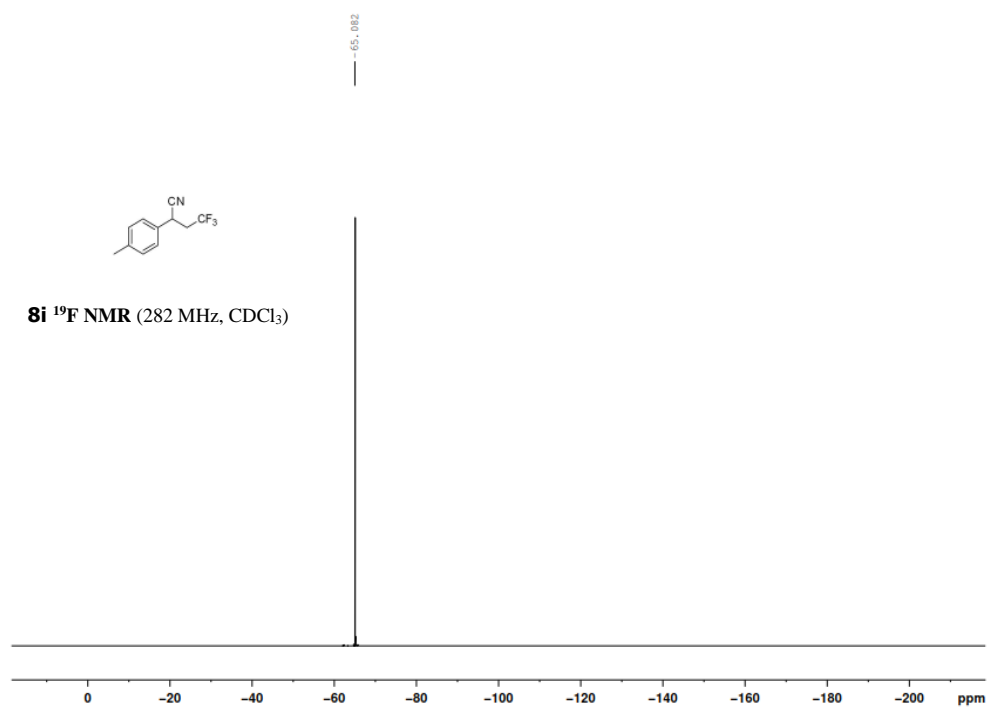

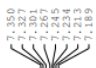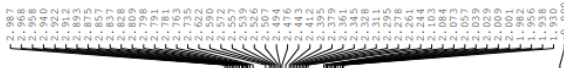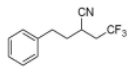

**8j** <sup>1</sup>H NMR (300 MHz, CDCl<sub>3</sub>)

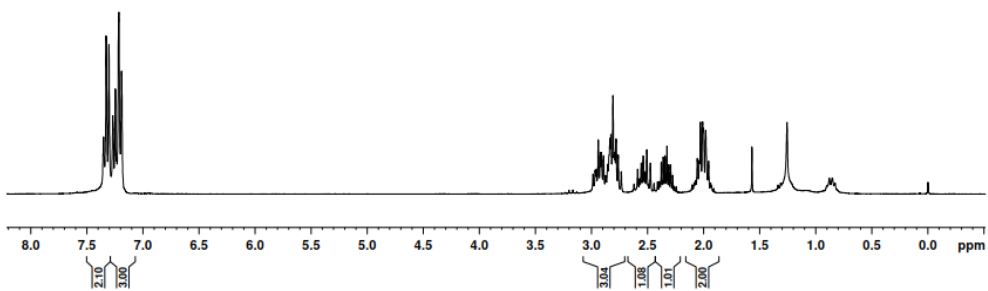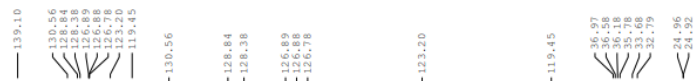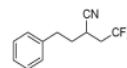

**8j** <sup>13</sup>C NMR (75 MHz, CDCl<sub>3</sub>)

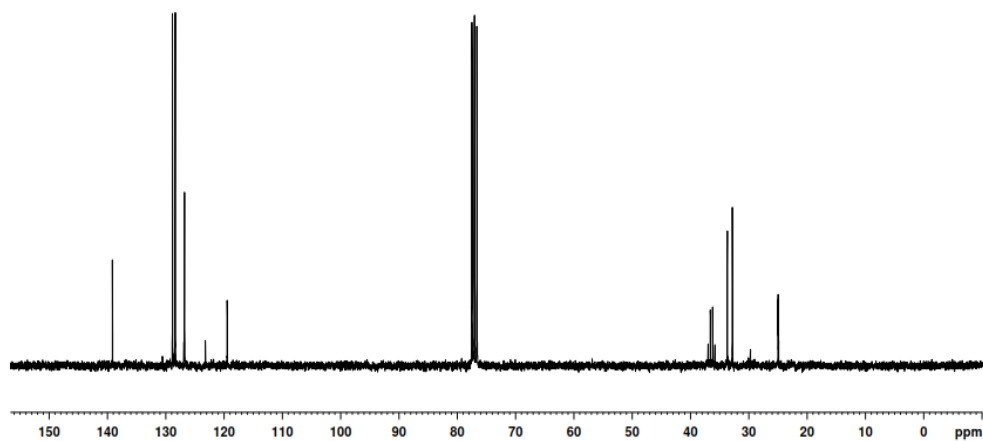



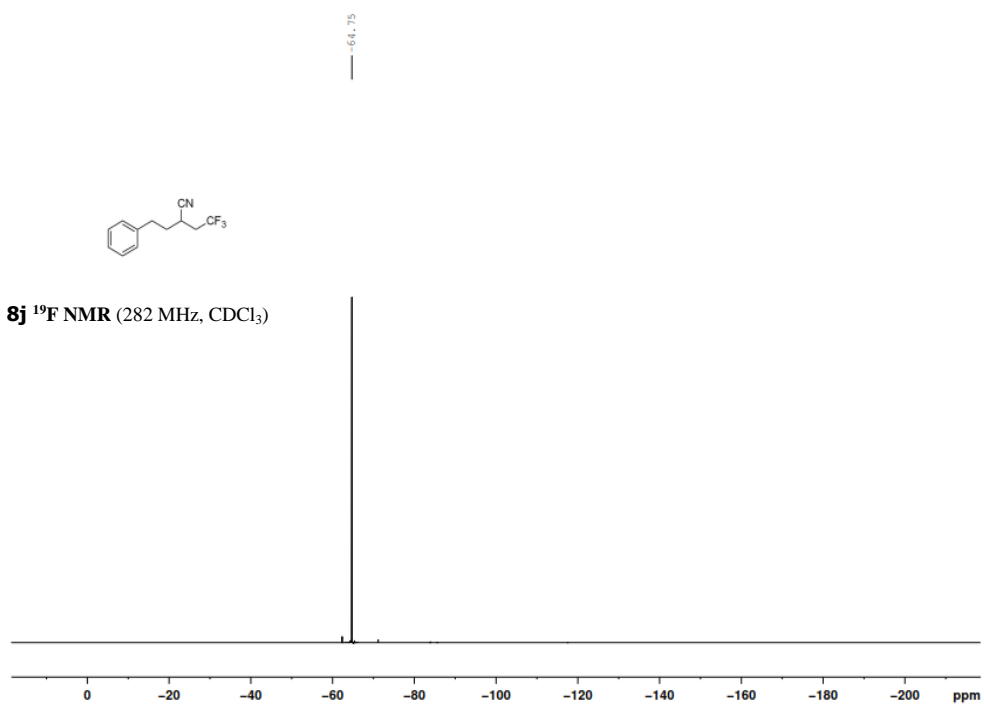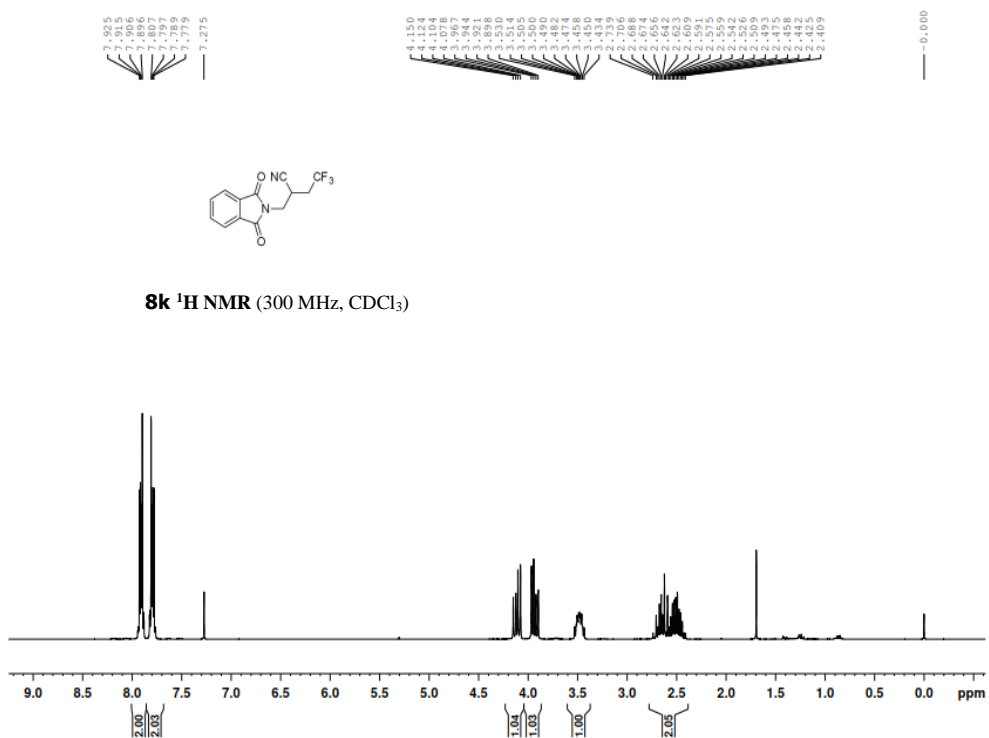

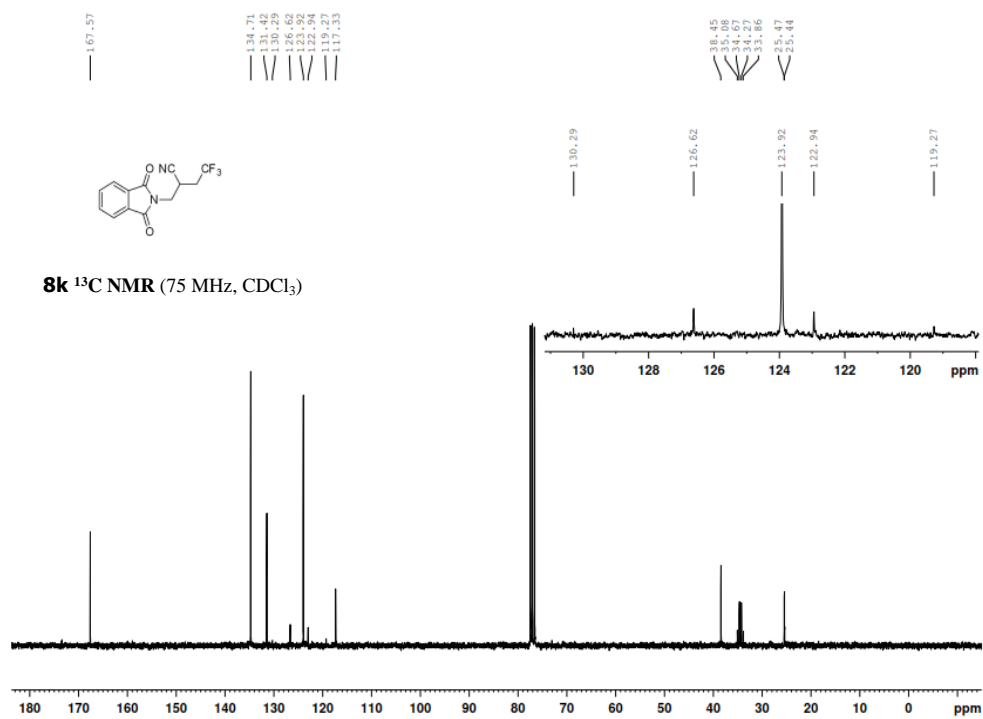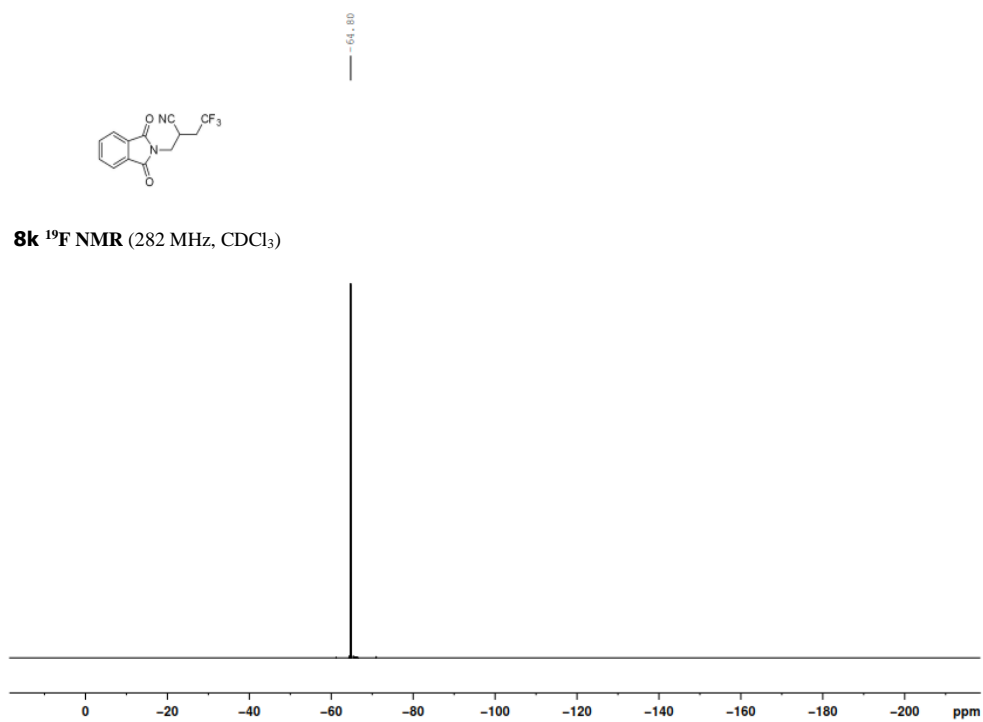

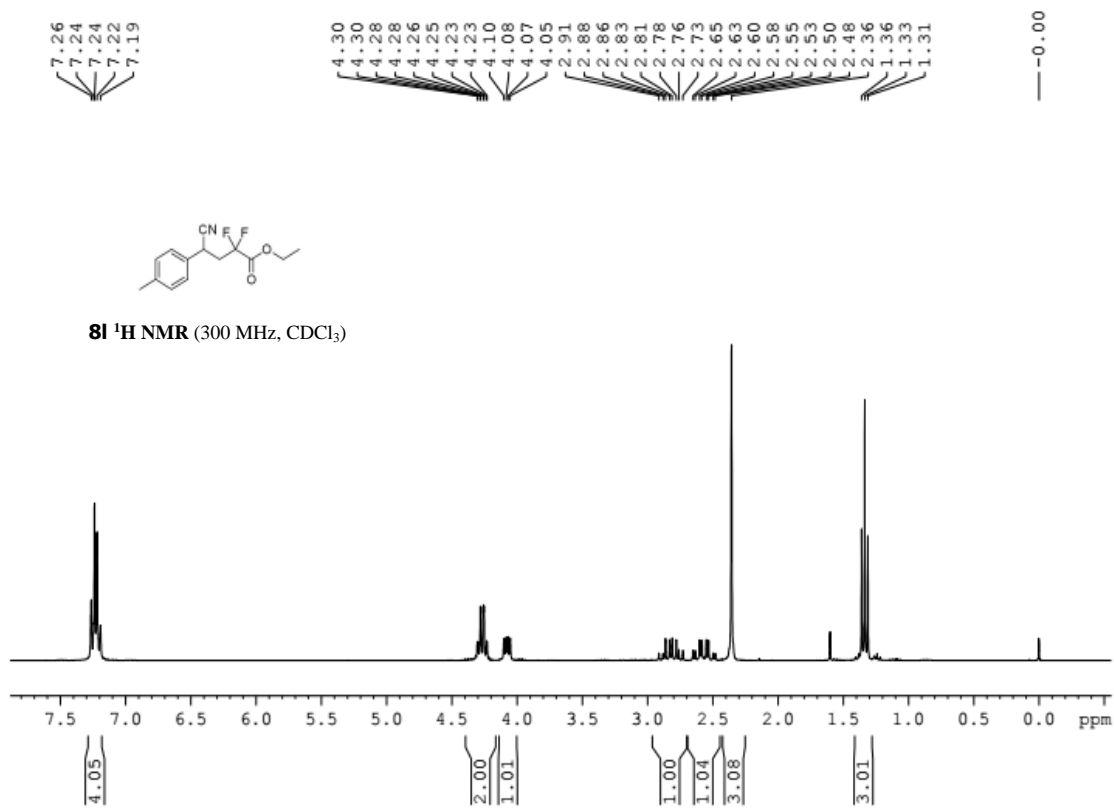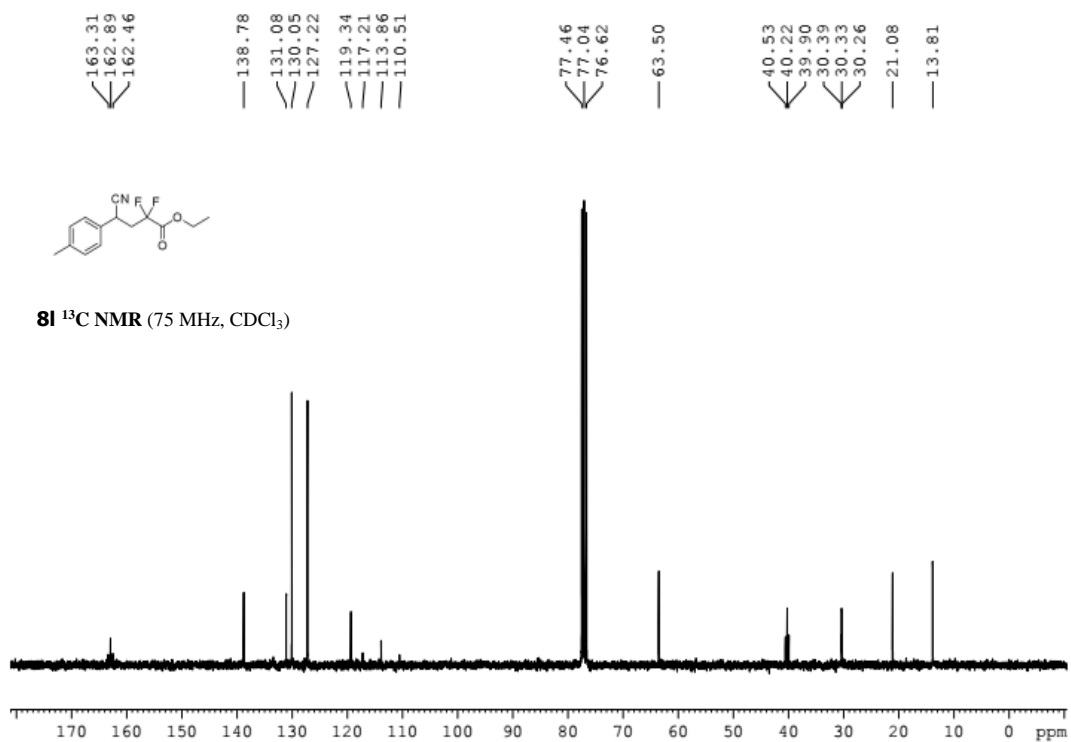

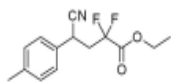

**8**  $^{19}\text{F}$  NMR (282 MHz,  $\text{CDCl}_3$ )

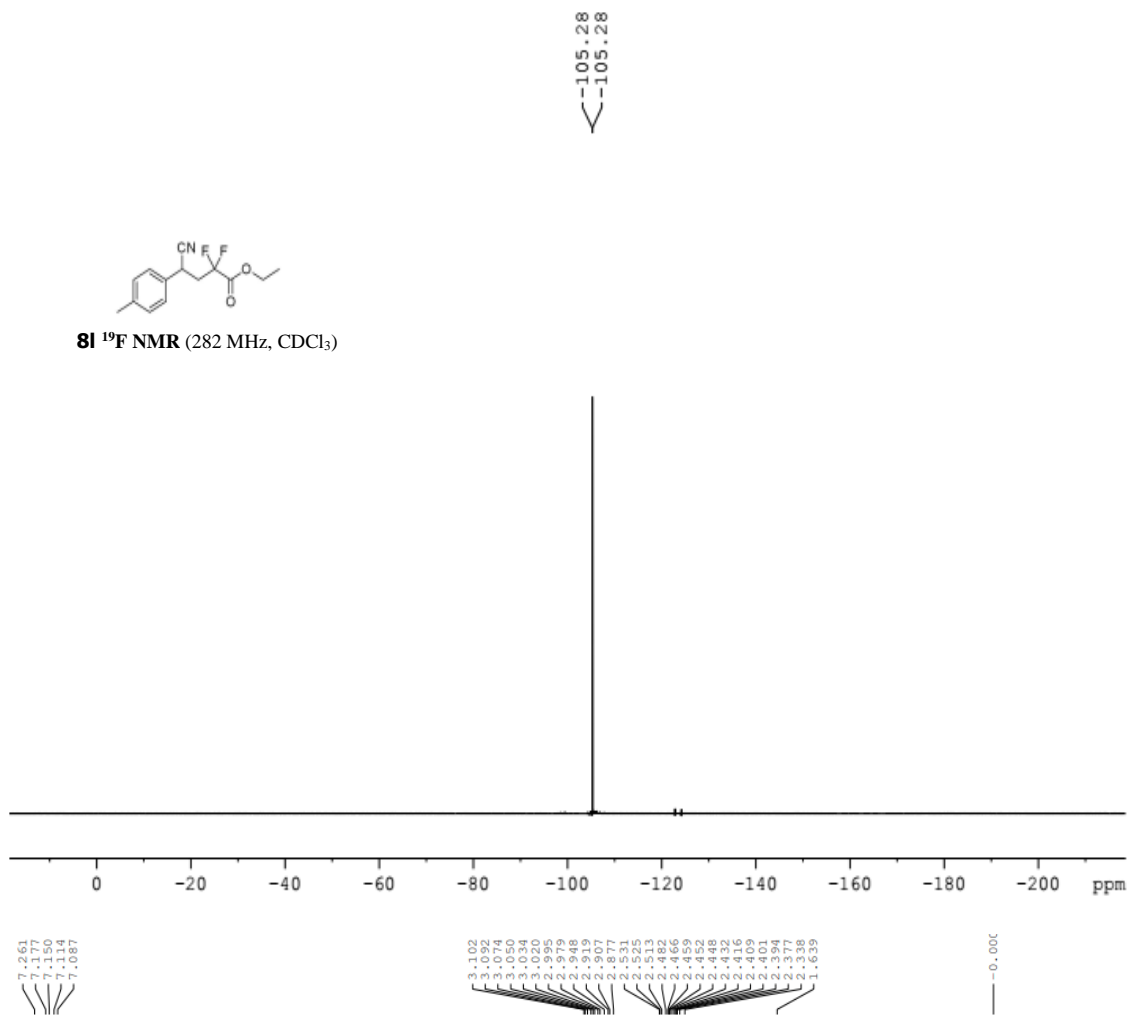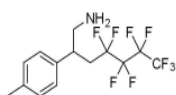

**9**  $^1\text{H}$  NMR (300 MHz,  $\text{CDCl}_3$ )

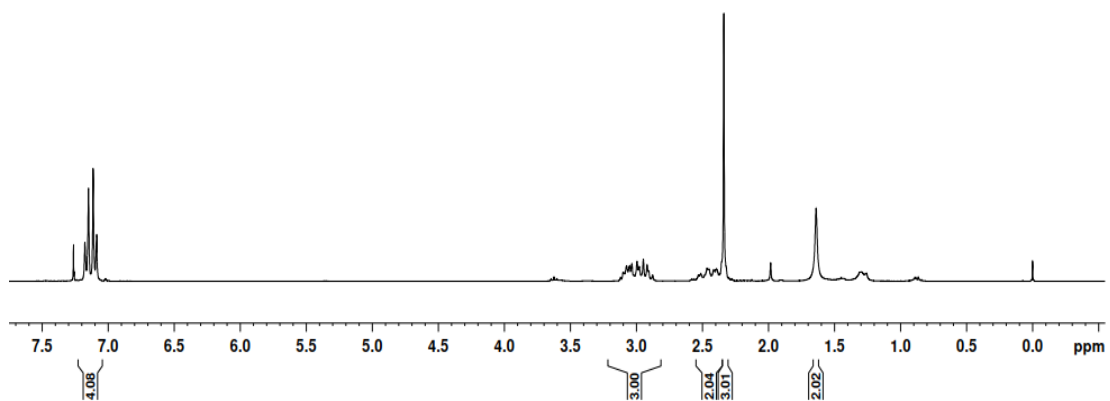

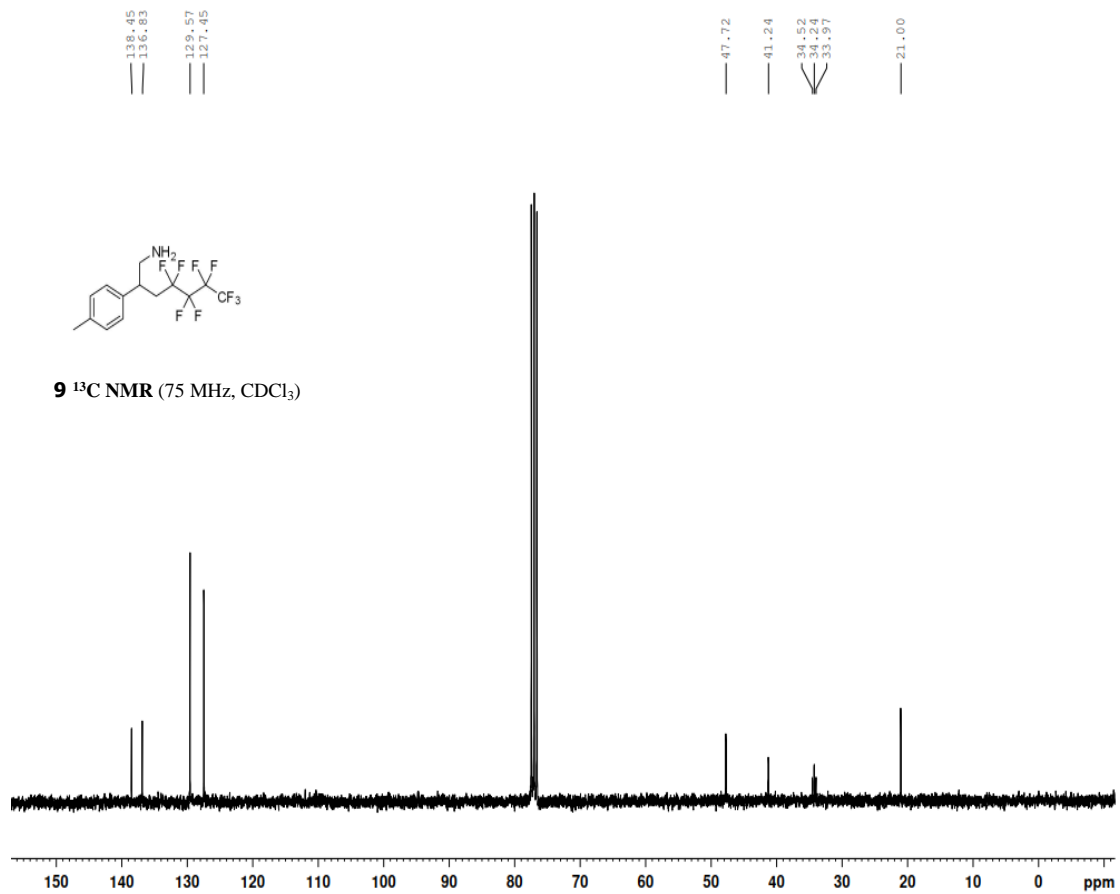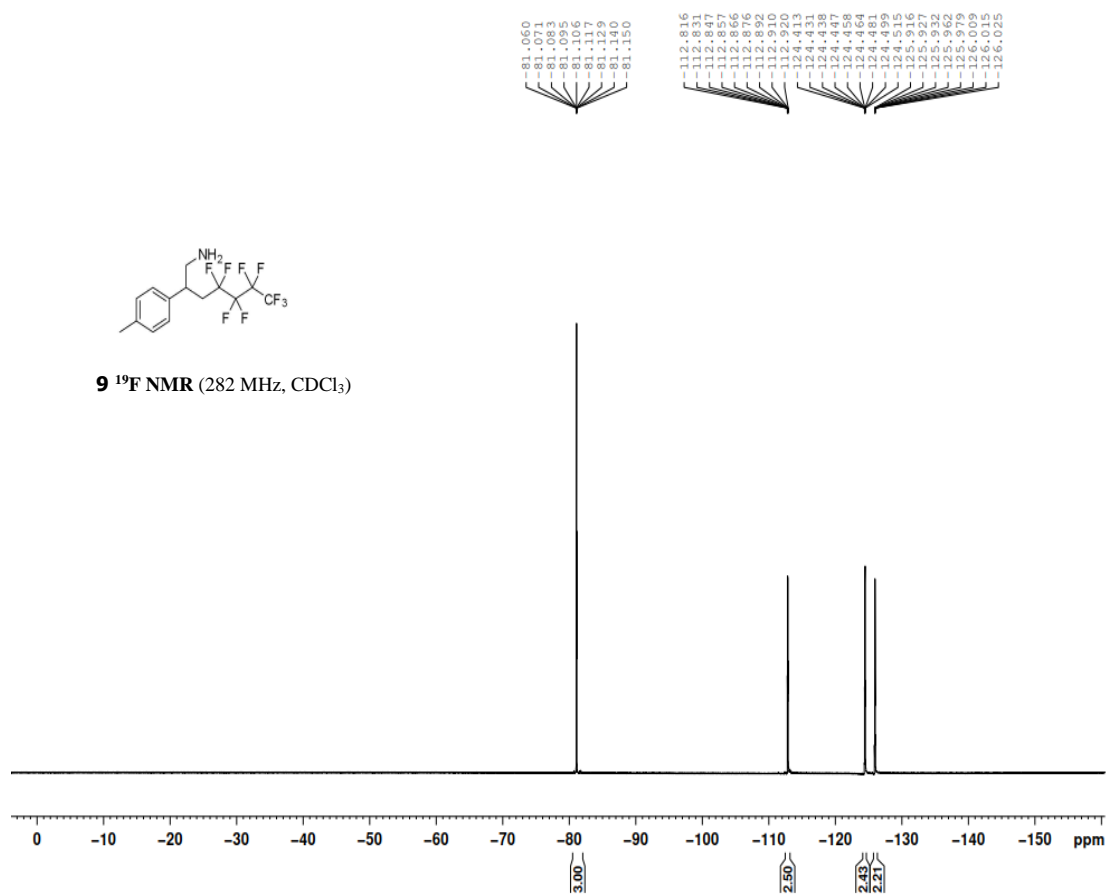

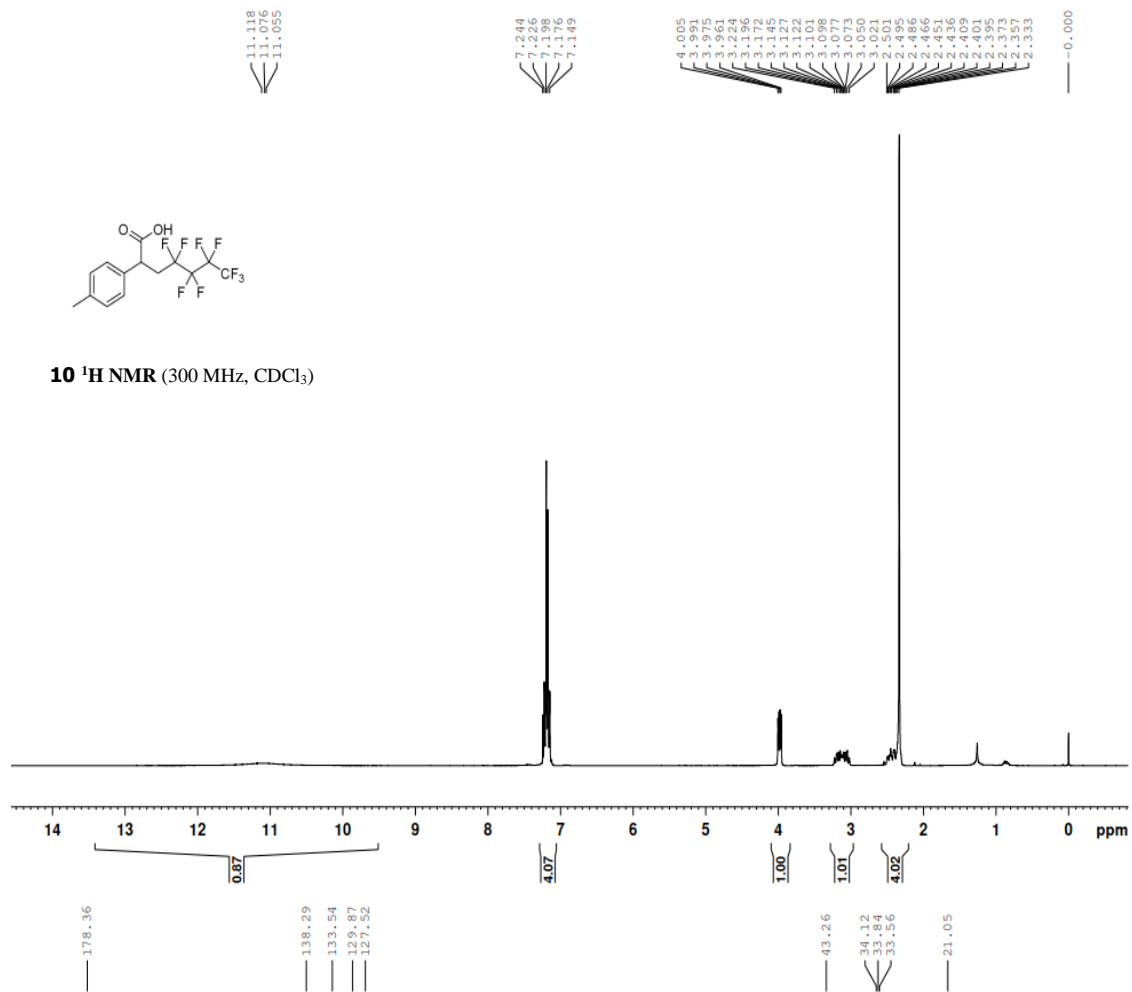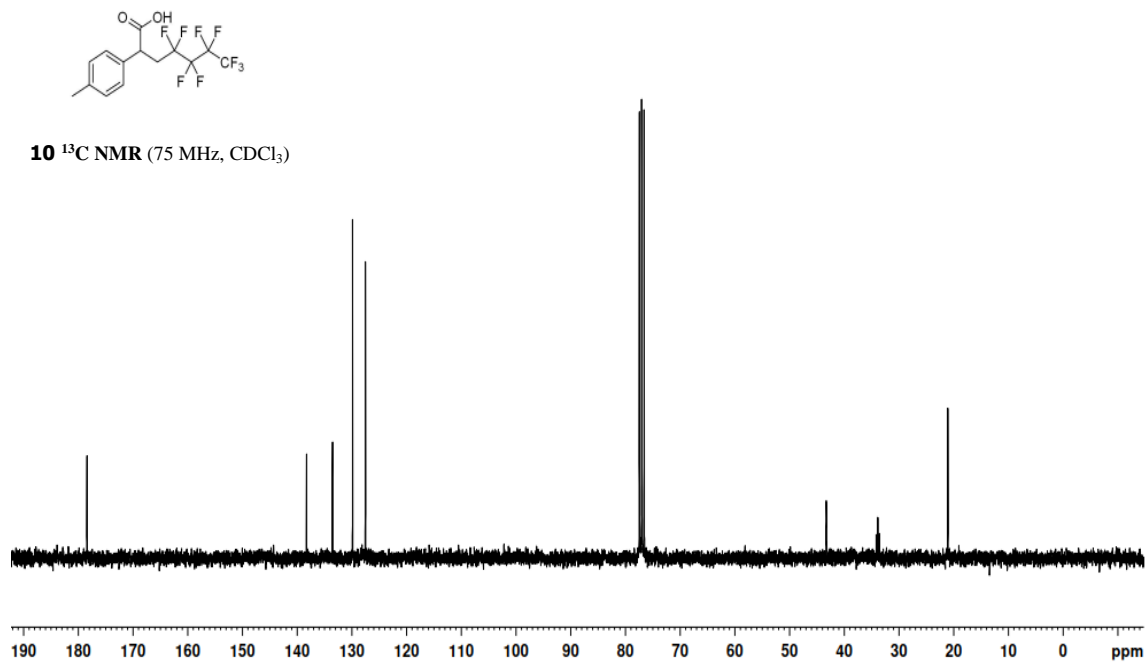

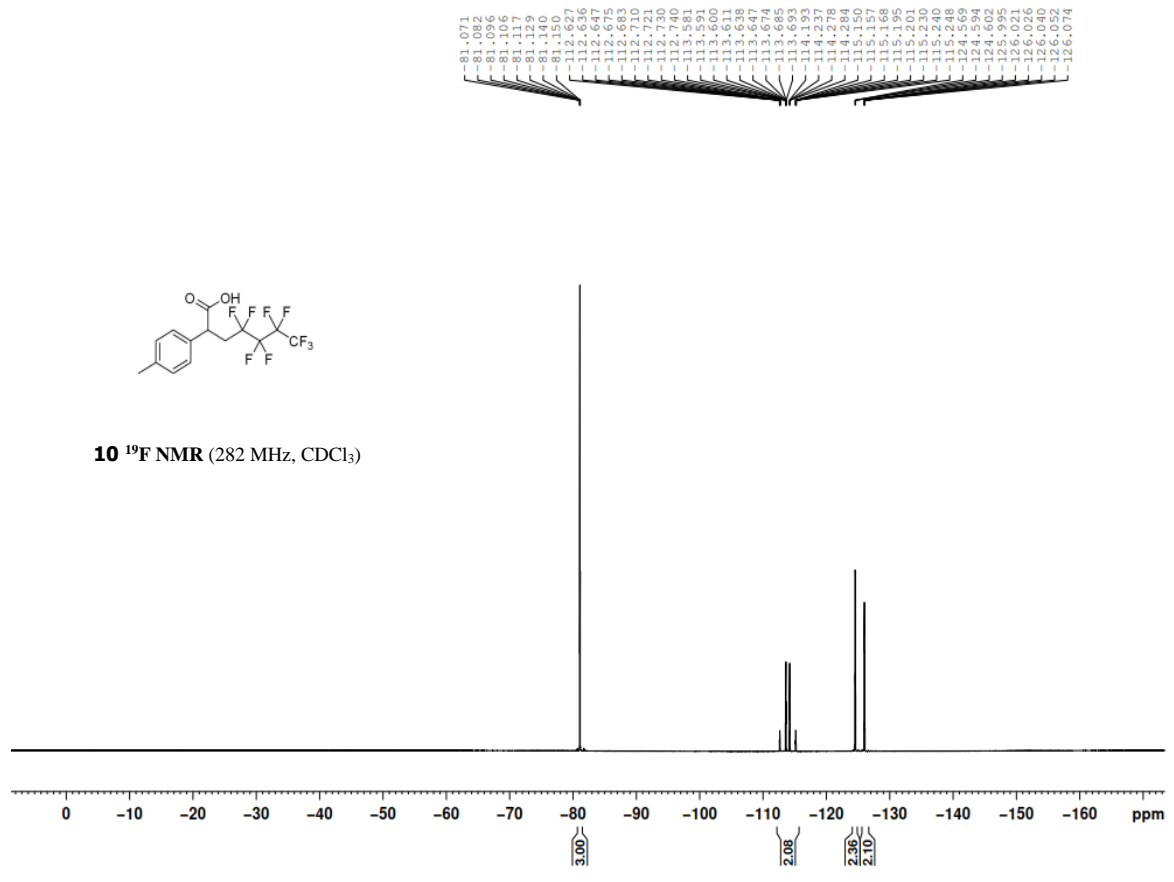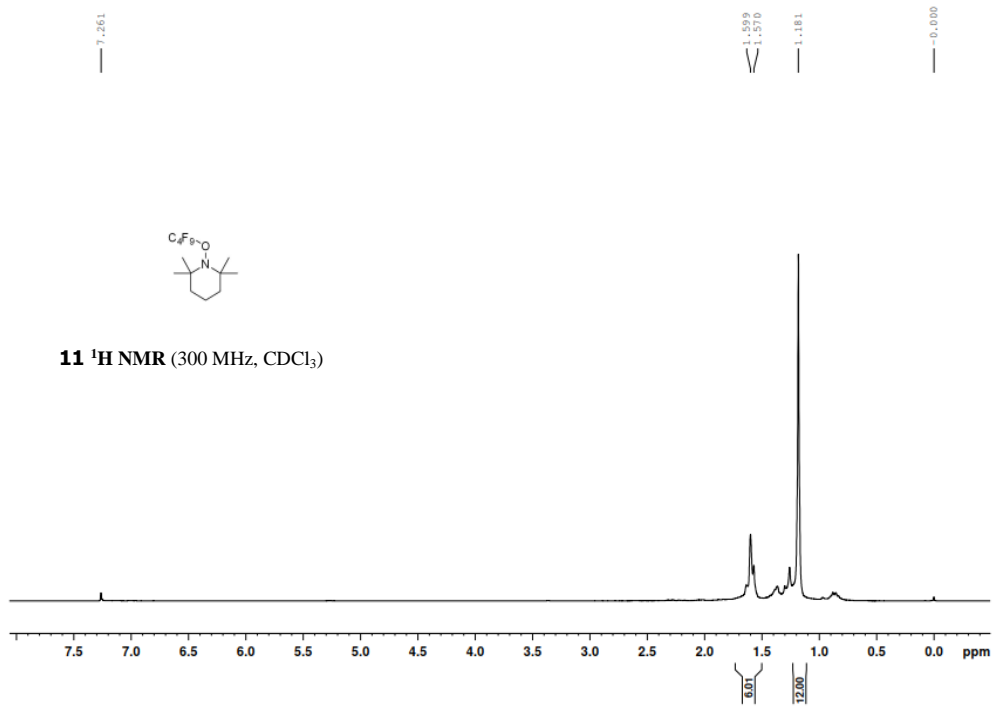

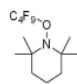

**11**  $^{13}\text{C}$  NMR (75 MHz,  $\text{CDCl}_3$ )

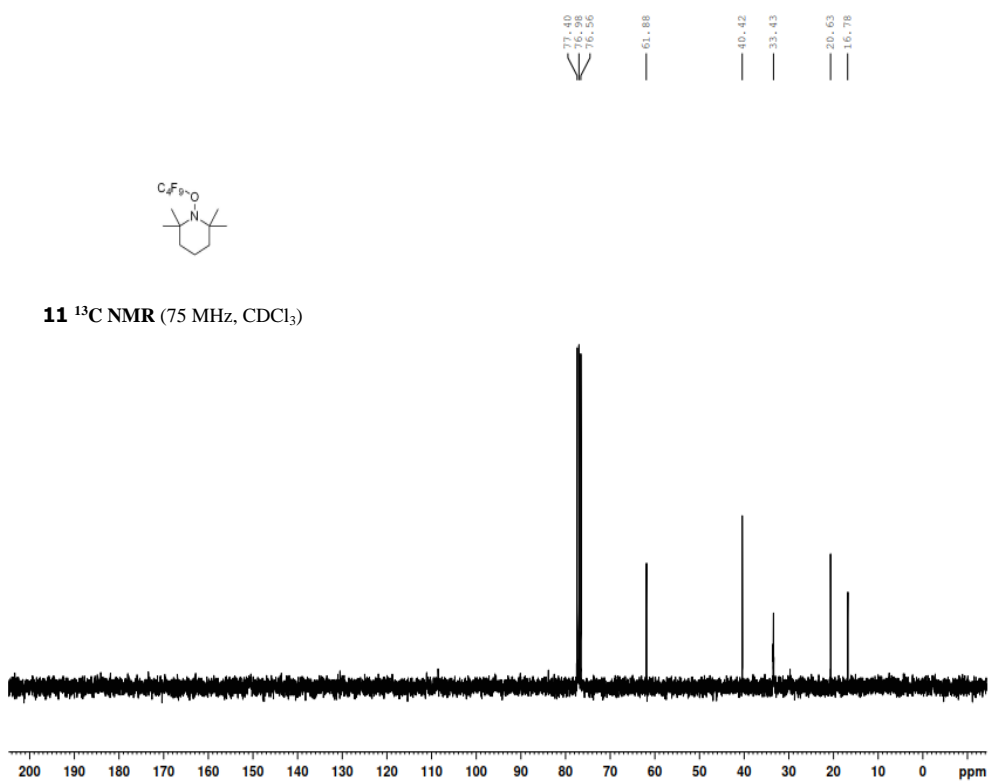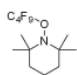

**11**  $^{19}\text{F}$  NMR (282 MHz,  $\text{CDCl}_3$ )

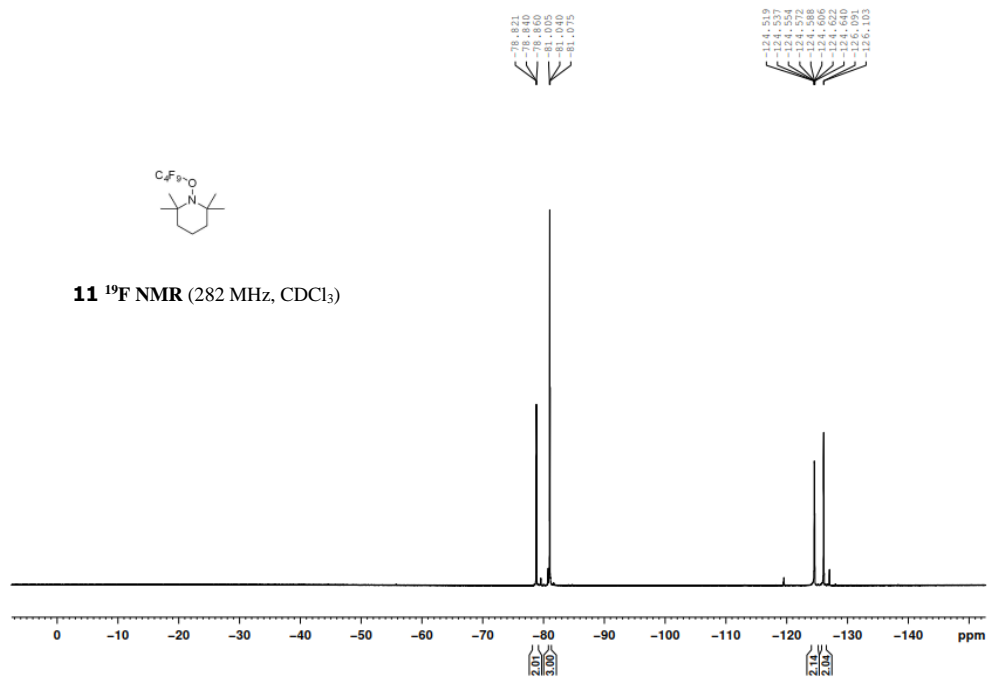

Supplement: c7cc07128k1.pdf [file c7cc07128k1.pdf]
